# Supplementary material for: Synthesis of novel pyrrolidine 3,4-diol derivatives as inhibitors of α-L-fucosidases
Source: Royal Society of Chemistry journal article supplement (doi:10.1039/b819867e), 2009-01-01

## Supporting Information

### Synthesis of Novel Pyrrolidine 3,4-Diol Derivatives as Inhibitors of $\alpha$ -L-Fucosidases.

*Elena Moreno-Clavijo,<sup>a</sup> Ana T. Carmona,<sup>a\*</sup> Yolanda Vera-Ayoso,<sup>a</sup> Antonio J. Moreno-Vargas,<sup>a</sup> Claudia Bello,<sup>b</sup> Pierre Vogel<sup>b</sup> and Inmaculada Robina.<sup>a\*</sup>*

a. Departamento de Química Orgánica, Facultad de Química, Universidad de Sevilla, Apartado 1203, E-41071 Sevilla, Spain.

b. Laboratory of Glycochemistry and Asymmetric Synthesis, Swiss Federal Institute of Technology (EPFL) 1015 Lausanne, Switzerland

[robina@us.es](mailto:robina@us.es), [anater@us.es](mailto:anater@us.es)

- General Methods and Experimental Procedures S2-S14
- Copies of <sup>1</sup>H and <sup>13</sup>C NMR spectra of compounds **39**, **40**, **24b**, **44**, **45**, **46**, **19a**, **20b**, **21b**, **54**, **21a**, **42**, **43**, **25b**, **47**, **49**, **19b**, **50**, **59**, **60**, **61**, **63**, **64**, **65**, **66**. S15-S40
- Lineweaver-Burk plots for enzymatic inhibition measurements of compounds **18a**, **18b**, **19a**, **20a**, **21a**, **21b**. S41-S47

**General Methods:** Optical rotations were measured in a 1.0 cm or 1.0 dm tube with a Perkin–Elmer 241MC spectropolarimeter.  $^1\text{H}$  and  $^{13}\text{C}$  NMR spectra were obtained for solutions in  $\text{CDCl}_3$ ,  $[\text{d}_6]\text{DMSO}$ ,  $\text{CD}_3\text{OD}$  and  $\text{D}_2\text{O}$ . All the assignments were confirmed by two-dimensional NMR experiments. The FAB mass spectra were obtained using glycerol or 3-nitrobenzyl alcohol as the matrix. TLC was performed on silica gel HF<sub>254</sub> (Merck), with detection by UV light charring with  $\text{H}_2\text{SO}_4$  or with Pancaldi reagent  $[(\text{NH}_4)_6\text{MoO}_4, \text{Ce}(\text{SO}_4)_2, \text{H}_2\text{SO}_4, \text{H}_2\text{O}]$ . Silica gel 60 (Merck, 230 mesh) was used for preparative chromatography.

For experimental procedures, spectroscopic data and NMR spectra for compounds **26-37**, **18a**, **18b** see: A. J. Moreno Vargas, A. T. Carmona, F. Mora, P. Vogel, I. Robina *Chem. Commun.* **2005**, 4949 (Supporting Information).

**5-deoxy-2,3-O-isopropylidene-L-lyxofuranose (41):** To a stirred solution of L-fucose (4 g, 24.36 mmol) in DMF (55 mL) at 0 °C was added 2,2-dimethoxypropane (13.8 mL) and PTSA (90 mg, 0.53 mmol). The reaction was stirred for 3 h at r.t. and then treated with  $\text{Na}_2\text{CO}_3$ . The mixture was filtered and the solution evaporated under reduced pressure. The residue was then dissolved in water and washed with petroleum ether.  $\text{NaIO}_4$  (6 g, 28 mmol) was added to the aqueous phase and the mixture was stirred for 1 h at r.t..  $\text{NaOH}$  (1N) was then added until basic pH and the reaction was stirred at r.t. for 1 h. The reaction mixture was then neutralized with  $\text{HCl}$  (1N) and extracted with ethyl acetate. The organic phase was dried ( $\text{Na}_2\text{SO}_4$ ), filtered and concentrated. The resulting residue was purified by column chromatography (petroleum ether:ethyl acetate, 3:1) to give pure **41** (2.76 g, 65%). P.f. = 48-50 °C;  $[\alpha]_{\text{D}}^{20}$  -28.0 (*c* 1 in  $\text{CH}_2\text{Cl}_2$ ); IR ( $\nu$   $\text{cm}^{-1}$ ) 3442 (OH), 2985, 2930, 1382, 1210, 1055; CIMS 157  $[(\text{M}-\text{H}_2\text{O} + \text{H})^+, 89\%]$ . Anal. calcd. for  $\text{C}_8\text{H}_{14}\text{O}_4$ : C, 55.16; H, 8.10. Found: C, 54.90; H, 7.83. Data for  $\alpha$ -anomer:  $^1\text{H}$  NMR (300 MHz,  $\text{CDCl}_3$ ,  $\delta$  ppm)  $\delta$  1.31-1.33 (6H, m, 4-Me,  $\text{C}(\text{CH}_3)_2$ ), 1.47 (3H, s,

$C(CH_3)_2$ ), 2.51 (1H, brs, OH), 4.31 (1H, qd,  $J_{4,Me} = 6.3$ ,  $J_{4,3} = 3.0$ , 4-H), 4.59-4.64 (2H, m, 2-H, 3-H), 5.34 (1H, s, 1-H).  $^{13}C$  NMR (75.4 MHz,  $CD_3Cl$ ,  $\delta$  ppm)  $\delta$  13.6 (4-Me), 25.2 ( $C(CH_3)_2$ ), 26.3 ( $C(CH_3)_2$ ), 76.3 (C-4), 81.2, 86.2 (C-2, C-3), 101.2 (C-1), 112.5 ( $C(CH_3)_2$ ); Data for  $\beta$ -anomer:  $^1H$  NMR (300 MHz,  $CDCl_3$ ,  $\delta$  ppm)  $\delta$  1.32 (3H, m, Me-4), 1.38 (3H, s,  $C(CH_3)_2$ ), 1.54 (3H, s,  $C(CH_3)_2$ ), 3.65 (1H, qd,  $J_{4,Me} = 6.3$ ,  $J_{4,3} = 3.0$ , 4-H), 3.84 (1H, d,  $J_{OH,1} = 12.3$ , OH), 4.49 (1H, dd,  $J_{2,3} = 6.0$ ,  $J_{2,1} = 3.3$ , 2-H), 4.54 (1H, dd, 3-H), 4.95 (1H, dd, 1-H).  $^{13}C$  NMR (75.4 MHz,  $CDCl_3$ ,  $\delta$  ppm)  $\delta$  13.4 (4-Me), 25.1 ( $C(CH_3)_2$ ), 26.0 ( $C(CH_3)_2$ ), 71.9 (C-4), 79.4, 81.2 (C-2, C-3), 96.7 (C-1), 113.1 ( $C(CH_3)_2$ ).

**(Z) and (E)- Ethyl 2,3,7-trideoxy-4,5-O-isopropylidene-L-lyxo-hept-2-enoate (42 and 43):** To a solution of **41** (2.66 g, 15.27 mmol) in dry toluene (31 mL), ethoxycarbonyltriphenylmethylenephosphorane (10 g, 28.7 mmol) was added, and the mixture was heated under reflux for 4 h. Then, the solvent was evaporated and the resulting residue was purified by column chromatography (ether:petroleum ether 1:2→1:1) to afford **42** (433 mg, 12%) and **43** (2.17 g, 58%), both as oils. Data for **42**:  $[\alpha]_D^{20} +100.7$  ( $c$  1.1 in  $CH_2Cl_2$ ); IR ( $\nu$   $cm^{-1}$ ) 3542 (OH), 2983, 2936, 1725 (C=O);  $^1H$  NMR (300 MHz,  $CDCl_3$ ,  $\delta$  ppm)  $\delta$  1.17 (3H, d,  $J_{Me,6} = 6.3$ , 6-Me), 1.28 (3H, t,  $^2J_{H,H} = 7.2$ ,  $CH_2CH_3$ ), 1.39, 1.52 (3H each, 2s,  $C(CH_3)_2$ ), 3.62 (1H, m, 6-H), 4.15 (2H, q,  $CH_2CH_3$ ), 4.29 (1H, dd,  $J_{5,4} = 7.5$ ,  $J_{5,6} = 3.0$ , 5-H), 5.60 (1H, td,  $J_{4,3} = 7.5$ ,  $J_{4,2} = 1.5$ , 4-H), 5.92 (1H, dd,  $J_{2,3} = 11.7$ , 2-H), 6.44 (1H, dd, 3-H).  $^{13}C$  NMR (75.4 MHz,  $CDCl_3$ ,  $\delta$  ppm)  $\delta$  14.3 ( $CH_2CH_3$ ), 20.6 (6-Me), 24.5, 26.4 ( $C(CH_3)_2$ ), 60.6 ( $CH_2CH_3$ ), 65.7 (C-6), 74.9 (C-4), 82.2 (C-5), 108.8 ( $C(CH_3)_2$ ), 120.1 (C-2), 147.6 (C-3), 166.0 (C=O); CIMS 229 [(M-Me) $^+$ , 15%], 245 [(M+H) $^+$ , 2%]; CIHRMS  $m/z$  found 245.1376, calcd. for  $C_{12}H_{21}O_5$  (M+H) $^+$ : 245.1389. Data for **43**:  $[\alpha]_D^{20} -1.6$  ( $c$  1.3 in  $CH_2Cl_2$ ); IR ( $\nu$   $cm^{-1}$ )

3454 (OH), 2984, 2937, 1722 (C=O), 1372, 1303, 1263;  $^1\text{H NMR}$  (300 MHz,  $\text{CDCl}_3$ ,  $\delta$  ppm)  $\delta$  1.16 (3H, d,  $J_{\text{Me},6} = 6.3$ , 6-Me), 1.29 (3H, t,  $\text{CH}_2\text{CH}_3$ ), 1.40, 1.54 (3H each, 2s,  $\text{C}(\text{CH}_3)_2$ ), 3.73 (1H, q,  $J_{6,5} = 6.3$ , 6-H), 4.03 (1H, t,  $J_{5,4} = 6.6$ , 5-H), 4.20 (2H, q,  $^2J_{\text{H,H}} = 7.2$ ,  $\text{CH}_2\text{CH}_3$ ), 4.69 (1H, td,  $J_{4,3} = 6.6$ ,  $J_{4,2} = 1.2$ , 4-H), 6.07 (1H, dd,  $J_{2,3} = 15.6$ , 2-H), 6.88 (1H, dd, 3-H).  $^{13}\text{C NMR}$  (75.4 MHz,  $\text{CDCl}_3$ ,  $\delta$  ppm)  $\delta$  14.3 ( $\text{CH}_2\text{CH}_3$ ), 19.3 (6-Me), 25.4, 27.8 ( $\text{C}(\text{CH}_3)_2$ ), 60.8 ( $\text{CH}_2\text{CH}_3$ ), 66.0 (C-6), 76.4 (C-4), 82.7 (C-5), 109.6 ( $\text{C}(\text{CH}_3)_2$ ), 123.9 (C-2), 142.6 (C-3), 165.9 (C=O); CIMS 245 [(M + H) $^+$ , 9%]; CIHRMS  $m/z$  found 245.1390, calcd. for  $\text{C}_{12}\text{H}_{21}\text{O}_5$  (M+H) $^+$ : 245.1389

**Ethyl 2,3,6,7-tetradecoxy-3,6-imino-4,5-O-isopropylidene-D-*altro*-heptanoate and ethyl 2,3,6,7-tetradecoxy-3,6-imino-4,5-O-isopropylidene-D-*allo*-heptanoate ((2R and 2S,3S,4R,5R)-2-ethoxycarbonylmethyl-3,4-O-isopropylidene-5-methyl-pyrrolidine-3,4-diol) (25a and 25b):** A solution of **43** (2.1 g, 8.60 mmol) in dry  $\text{CH}_2\text{Cl}_2$  was added dropwise to a stirred solution of methanesulphonyl chloride (2.4 mL, 31.1 mmol) in dry pyridine (9 mL) cooled to 0 °C. The mixture was left at r.t. overnight. Then, the mixture was cooled to 0 °C, water was added and the reaction was stirred for 15 min at r.t.. The solvent was evaporated, the crude diluted with dichloromethane, washed with  $\text{H}_2\text{O}$  and brine. The organic phase was dried, filtered and concentrated. The residue was then dissolved in EtOH, cooled to 0 °C, and saturated with  $\text{NH}_3$ . After 5 days at r.t., the solvent was evaporated and the residue was treated with  $\text{NH}_4\text{OH}$  (25%) and extracted with  $\text{CH}_2\text{Cl}_2$ . The organic phase was washed with satd. aq. sol. of  $\text{NaHCO}_3$  and  $\text{H}_2\text{O}$  until neutral pH. The organic phase was dried ( $\text{Na}_2\text{SO}_4$ ), filtered and concentrated. The resulting residue was purified by column chromatography (ethyl acetate (1%  $\text{Et}_3\text{N}$ ) to afford **25a** (1.09 g) and **25b** (0.22 g) (63%, 2 steps). Data for **25a**:  $[\alpha]_{\text{D}}^{20} -40.5$  ( $c$  1.2 in  $\text{CH}_2\text{Cl}_2$ ); IR ( $\nu$   $\text{cm}^{-1}$ ) 2980, 2934, 1734 (C=O), 1373, 1263, 1209, 1066, 1045, 872;  $^1\text{H NMR}$  (300 MHz,  $\text{CDCl}_3$ ,  $\delta$  ppm)  $\delta$  1.05 (3H, d,  $J_{\text{Me},6} = 7.2$ , 6-Me), 1.26 (3H, t,  $^2J_{\text{H,H}} =$

7.2,  $\text{CH}_2\text{CH}_3$ ), 1.29, 1.44 (3H each, 2s,  $\text{C}(\text{CH}_3)_2$ ), 2.15 (1H, s, *NH*), 2.56 (1H, dd,  $^2J_{2a,2b} = 16.2$ ,  $J_{2a,3} = 6.6$ , 2a-H), 2.65 (1H, dd,  $J_{2b,3} = 7.5$ , 2b-H), 3.31 (1H, q, 6-H), 3.44 (1H, m, 3-H), 4.15 (2H, q,  $\text{CH}_2\text{CH}_3$ ), 4.39 (1H, d,  $J_{5,4} = 5.7$ , 5-H), 4.66 (1H, dd,  $J_{4,3} = 4.7$ , 4-H).  $^{13}\text{C}$  NMR (75.4 MHz,  $\text{CDCl}_3$ ,  $\delta$  ppm)  $\delta$  14.3 ( $\text{CH}_2\text{CH}_3$ ), 17.4 (6-Me), 24.2, 26.1 ( $\text{C}(\text{CH}_3)_2$ ), 33.8 (C-2), 56.5 (C-3), 58.7 (C-6), 60.6 ( $\text{CH}_2\text{CH}_3$ ), 82.7 (C-4), 87.3 (C-5), 111.1 ( $\text{C}(\text{CH}_3)_2$ ), 172.1 (C=O); CIMS 245 [(M + H)<sup>+</sup>, 14%], 244 [(M)<sup>+</sup>, 100%]; CIHRMS  $m/z$  found 244.1553, calcd. for  $\text{C}_{12}\text{H}_{22}\text{NO}_4$  (M+H)<sup>+</sup>: 244.1549. Anal. calcd. for  $\text{C}_{12}\text{H}_{21}\text{NO}_4$ : C, 59.24; H, 8.70; N, 5.76. Found: C, 58.91; H, 8.28; N, 5.68. Data for **25b**:  $[\alpha]_{\text{D}}^{20}$  -17.6 ( $c$  1.31 in  $\text{CH}_2\text{Cl}_2$ ); IR ( $\nu$   $\text{cm}^{-1}$ ) 3349 (*NH*), 2981, 2930, 1733 (C=O), 1372;  $^1\text{H}$  NMR (300 MHz,  $\text{CDCl}_3$ ,  $\delta$  ppm)  $\delta$  1.21 (3H, d,  $J_{\text{Me},6} = 6.6$ , 6-Me), 1.24 (3H, t,  $^2J_{\text{H,H}} = 7.2$ ,  $\text{CH}_2\text{CH}_3$ ), 1.29, 1.49 (3H each, 2s,  $\text{C}(\text{CH}_3)_2$ ), 2.28 (1H, br s, *NH*), 2.46 (1H, dd,  $^2J_{2a,2b} = 16.2$ ,  $J_{2a,3} = 9.0$ , 2a-H), 2.72 (1H, dd,  $J_{2b,3} = 4.2$ , 2b-H), 3.20 (1H, m, 6-H), 3.45 (1H, m, 3-H), 4.09-4.20 (3H, m, 5-H,  $\text{CH}_2\text{CH}_3$ ), 4.26 (1H, dd,  $J_{4,5} = 7.2$ ,  $J_{4,3} = 5.1$ , 4-H).  $^{13}\text{C}$  NMR (75.4 MHz,  $\text{CDCl}_3$ ,  $\delta$  ppm)  $\delta$  14.3 ( $\text{CH}_2\text{CH}_3$ ), 19.5 (6-Me), 25.5, 27.5 ( $\text{C}(\text{CH}_3)_2$ ), 38.6 (C-2), 59.7 (C-6), 60.7, 60.8 (C-3,  $\text{CH}_2\text{CH}_3$ ), 84.7 (C-4), 87.3 (C-5), 117.2 ( $\text{C}(\text{CH}_3)_2$ ), 172.1 (C=O); CIMS 245 [(M + H)<sup>+</sup>, 6%], 244 [(M)<sup>+</sup>, 54%]; CIHRMS  $m/z$  found 244.1544, calcd. for  $\text{C}_{12}\text{H}_{22}\text{NO}_4$  (M+H)<sup>+</sup>: 244.1549.

**Ethyl *N*-Benzyloxycarbonyl-2,3,6,7-tetra-deoxy-3,6-imino-4,5-*O*-isopropylidene-*D*,*altro*-heptanoate ((2*R*,3*S*,4*R*,5*R*)-*N*-Benzyloxycarbonyl-2-ethoxycarbonylmethyl-3,4-*O*-isopropylidene-5-methyl-pyrrolidine-3,4-diol) (47):** To a solution of **25a** (0.866 g, 3.56 mmol) in 1:1 EtOH:H<sub>2</sub>O (48 mL), NaHCO<sub>3</sub> (0.51 g, 6.05 mmol) and CbzCl (0.562 mL, 3.92 mmol) were added. After stirring for 2 h at r.t., the mixture was poured into satd. aq. sol. of NaHCO<sub>3</sub> and extracted with AcOEt. The organic phases were dried (Na<sub>2</sub>SO<sub>4</sub>), filtered and concentrated. The resulting residue was purified by

column chromatography (ether:petroleum ether 1:2) to give pure **47** (1.21 g, 90%).  $[\alpha]_{\text{D}}^{20}$  -76.6 (*c* 1.1 in  $\text{CH}_2\text{Cl}_2$ ); IR ( $\nu \text{ cm}^{-1}$ ) 2983, 1732 (C=O), 1703 (C=O);  $^1\text{H NMR}$  (500 MHz,  $\text{DMSO-}d_6$ , 353 K,  $\delta$  ppm)  $\delta$  1.12 (3H, d,  $J_{6,\text{Me}} = 6.9$ , 6-Me), 1.18 (3H, t,  $^2J_{\text{H,H}} = 7.0$ ,  $\text{CH}_2\text{CH}_3$ ), 1.26, 1.38 (3H each, 2s,  $\text{C}(\text{CH}_3)_2$ ), 2.49 (1H, dd,  $^2J_{2\text{a},2\text{b}} = 16.5$ ,  $J_{2\text{a},3} = 9.0$ , 2a-H), 3.14 (1H, m, 2b-H), 4.00 (1H, q, 6-H), 4.07 (2H, m,  $\text{CH}_2\text{CH}_3$ ), 4.14 (1H, m, 3-H), 4.43 (1H, d,  $J_{5,4} = 6.0$ , 5-H), 4.83 (1H, t,  $J_{4,3} = 6.0$ , 4-H), 5.06 (1H, d,  $^2J_{\text{H,H}} = 12.5$ ,  $\text{CH}_2$  of Cbz), 5.11 (1H, d,  $\text{CH}_2$  of Cbz), 7.31-7.38 (5H, m, H-arom.).  $^{13}\text{C NMR}$  (125.7 MHz,  $\text{DMSO-}d_6$ , 353 K,  $\delta$  ppm)  $\delta$  13.5 ( $\text{CH}_2\text{CH}_3$ ), 16.2 (6-Me), 24.4, 25.2 ( $\text{C}(\text{CH}_3)_2$ ), 39.5 (C-2), 56.0 (C-3), 57.9, 59.1 (C-6,  $\text{CH}_2\text{CH}_3$ ), 65.7 ( $\text{CH}_2$  of Cbz), 78.4 (C-4), 82.9 (C-5), 110.4 ( $\text{C}(\text{CH}_3)_2$ ), 127.2, 127.4, 127.9, 136.4, (C-Ar), 154.0 (C=O of Cbz), 170.2 (COOEt); CIMS 378  $[(\text{M} + \text{H})^+]$ , 7%), 377  $[(\text{M})^+]$ , 4%; CIHRMS  $m/z$  found 378.1930, calcd. for  $\text{C}_{20}\text{H}_{28}\text{NO}_6$   $(\text{M} + \text{H})^+$ : 378.1916.

**(2R,3S,4R,5R)-N-Benzyloxycarbonyl-(2-(2-aminophenylcarbamoylmethyl)-3,4-O-isopropylidene-5-methylpyrrolidine-3,4-diol (48):** A solution of **47** (1.18 g, 3.12 mmol) in 2:1 EtOH: NaOH (90 mL) was heated to 50 °C for 1.5 h. The mixture was neutralized with IRA-120H<sup>+</sup>, filtered and concentrated. The crude acid was then dissolved in DMF and *o*-phenylenediamine (0.371 g, 3.43 mmol), DIPEA (1.07 mL, 6.24 mmol) and pyBOP (1.79 g, 3.43 mmol) were added. The mixture was stirred at r.t. for 4 h. After evaporation of the solvent, the residue was dissolved in  $\text{CH}_2\text{Cl}_2$  and washed with satd. aq. sol. of citric acid and brine. The organic phase was dried ( $\text{Na}_2\text{SO}_4$ ), filtered and concentrated. The resulting residue was purified by column chromatography ( $\text{CH}_2\text{Cl}_2$ :MeOH, 40:1) to give pure **48** (1.22 g, 89%, 2 steps).  $[\alpha]_{\text{D}}^{20}$  -49 (*c* 0.95 in  $\text{CH}_2\text{Cl}_2$ ); IR ( $\nu \text{ cm}^{-1}$ ) 3446 (NH), 3364 (NH), 3030, 2984, 2932, 1697 (C=O);  $^1\text{H NMR}$  (500 MHz,  $\text{DMSO-}d_6$ , 353 K,  $\delta$  ppm)  $\delta$  1.13 (3H, d,  $J_{\text{Me},5} = 7.0$ , 5-Me), 1.28, 1.44 (3H each, 2s,  $\text{C}(\text{CH}_3)_2$ ), 2.63 (1H, dd,  $^2J_{1'\text{a},1'\text{b}} = 15.5$ ,  $J_{1'\text{a},2} = 9.0$ , 1'a-H), 3.31 (1H,

br d, 1'b-H), 4.02 (1H, q, 5-H), 4.23 (1H, m, 2-H), 4.42 (1H, d,  $J_{4,3} = 6.0$ , 4-H), 4.67 (2H, brs, NH<sub>2</sub>), 4.84 (1H, t,  $J_{3,2} = 6.0$ , 3-H), 5.09 (1H, d,  $^2J_{H,H} = 12.5$ , CH<sub>2</sub> of Cbz), 5.12 (1H, d, CH<sub>2</sub> of Cbz), 6.52 (1H, td,  $J = 7.5$ ,  $J = 1.5$ , H-arom.), 6.71 (1H, dd,  $J = 8.0$ ,  $J = 1.5$ , H-arom), 6.90 (1H, td,  $J = 8.0$ ,  $J = 1.5$ , H-arom.), 7.09 (1H, d,  $J = 7.5$ , H-arom), 7.29-7.39 (5H, m, H-arom. of Cbz), 8.79 (1H, brs, CONH). <sup>13</sup>C NMR (125.7 MHz, DMSO-*d*<sub>6</sub>, 353 K, δ ppm) δ 16.1 (Me-5), 24.5, 25.6 (C(CH<sub>3</sub>)<sub>2</sub>), 34.9 (C-1'), 56.3 (C-2), 58.3 (C-5), 65.6 (CH<sub>2</sub> of Cbz), 79.0 (C-3), 82.8 (C-4), 110.3 (C(CH<sub>3</sub>)<sub>2</sub>), 115.2, 115.7, 123.1, 125.6, 127.2, 127.4, 127.9, 136.5, 142.3 (C-Ar), 154.1 (C=O of Cbz), 169.1 (CONH); CIMS 440 [(M + H)<sup>+</sup>, 8%], 439 [(M)<sup>+</sup>, 18%], 91 (100); CIHRMS *m/z* found 439.2110, calcd. for C<sub>24</sub>H<sub>29</sub>N<sub>3</sub>O<sub>5</sub> (M)<sup>+</sup>: 439.2107. Anal. calcd. for C<sub>24</sub>H<sub>29</sub>N<sub>3</sub>O<sub>5</sub>: C, 65.59; H, 6.65; N, 9.56. Found: C, 65.58; H, 6.72; N, 9.13.

**(2R,3S,4R,5R)-N-Benzyloxycarbonyl-(2-(1H-Benzoimidazol-2-ylmethyl)-3,4-O-**

**isopropylidene-5-methylpyrrolidine-3,4-diol (49):** A solution of **48** (41 mg, 0.09 mmol) in glacial AcOH (1.5 mL) was stirred at 65 °C for 4 h. Then, the solvent was evaporated and the resulting residue was purified by column chromatography (ether:petroleum ether, 10:1) to give pure **49** (39 mg, 100%).  $[\alpha]_D^{20}$  -48.6 (*c* 1.1 in CH<sub>2</sub>Cl<sub>2</sub>); IR (ν cm<sup>-1</sup>) 2895, 2933, 1701 (C=O); <sup>1</sup>H NMR (300 MHz, DMSO-*d*<sub>6</sub>, δ ppm) δ 1.18 (3H, d,  $J_{Me,5} = 6.9$ , 5-Me), 1.23, 1.43 (3H each, 2s, C(CH<sub>3</sub>)<sub>2</sub>), 3.15 (1H, m, 1'a-H), 3.90 (1H, dd,  $^2J_{1'b,1'a} = 15.9$ ,  $J_{1'b,2} = 3.6$ , 1'b-H), 4.08 (1H, q, 5-H), 4.44 (1H, d,  $J_{4,3} = 6.0$ , 4-H), 4.53 (1H, m, 2-H), 4.88 (1H, t,  $J_{3,2} = 6.0$ , 3-H), 5.09 (2H, s, CH<sub>2</sub> of Cbz), 7.09-7.14 (2H, m, H-arom.), 7.27-7.37 (5H, m, H-arom.), 7.46 (2H, brs, H-arom.), 11.81 (1H, s, NH). <sup>13</sup>C NMR (75.4 MHz, DMSO-*d*<sub>6</sub>, δ ppm) δ 16.1 (5-Me), 24.5, 25.7 (C(CH<sub>3</sub>)<sub>2</sub>), 27.4 (C-1'), 57.6 (C-2), 58.8 (C-5), 65.7 (CH<sub>2</sub> of Cbz), 78.8 (C-3), 82.8 (C-4), 110.4 (C(CH<sub>3</sub>)<sub>2</sub>), 119.2, 127.2, 127.4, 127.9, 136.5, 152.5 (C-Ar), 154.6 (C=O of

Cbz); CIMS 422 [(M + H)<sup>+</sup>, 100%], 421 [(M)<sup>+</sup>, 51%]; CIHRMS *m/z* found 422.2061, calcd. for C<sub>24</sub>H<sub>28</sub>N<sub>3</sub>O<sub>4</sub> (M+H)<sup>+</sup>: 422.2079.

**(2R,3S,4R,5R)-2-(1H-Benzoimidazol-2-ylmethyl)-5-methylpyrrolidine-3,4-diol**

**hydrochloride (19b)**: A solution of **49** (50 mg, 0.119 mmol) in MeOH (6 mL) was hydrogenated with Pd-C (10%) as catalyst. After 30 min, the catalyst was filtered off and the solution concentrated. The residue was purified by column chromatography (CH<sub>2</sub>Cl<sub>2</sub>:MeOH, 14:1) and the pure product thus obtained (27.3 mg, 0.095 mmol, 80%) was treated with 4M HCl (1 mL) and stirred for 12 h at r.t. After evaporation of the solvent, the resulting residue was purified by column chromatography (CH<sub>2</sub>Cl<sub>2</sub>:MeOH, 4:1) to give pure **19b** (19.7 mg, 73%). [ $\alpha$ ]<sub>D</sub><sup>25</sup> + 20.5 (*c* 1.3 in MeOH); IR ( $\nu$  cm<sup>-1</sup>) 3252-2927 (OH, NH), 1445, 1272, 1129, 743; <sup>1</sup>H NMR (300 MHz, CD<sub>3</sub>OD,  $\delta$  ppm)  $\delta$  1.48 (3H, d, *J*<sub>Me,5</sub> = 6.6, 5-Me), 3.39 (1H, dd, <sup>2</sup>*J*<sub>1'a,1'b</sub> = 15.9, *J*<sub>1'a,2</sub> = 7.8, 1'a-H), 3.54 (1H, dd, *J*<sub>1'b,2</sub> = 7.2, 1'b-H), 3.61 (1H, m, 5-H), 3.98 (1H, dd, *J*<sub>4,5</sub> = 9.0, 4-H), 4.18 (1H, t, *J*<sub>3,2</sub> = *J*<sub>3,4</sub> = 3.6, 3-H), 4.28 (1H, m, 2-H), 7.25 (2H, dd, H-arom.), 7.55 (2H, dd, *J* = 3.3, *J* = 6.0, H-arom.). <sup>13</sup>C NMR (75.4 MHz, CD<sub>3</sub>OD,  $\delta$  ppm)  $\delta$  15.8 (5-Me), 27.3 (C-1'), 58.2 (C-5), 59.8 (C-2), 72.1 (C-3), 78.3 (C-4), 115.6, 123.8, 139.3, 151.5 (C-Ar); CIMS 248 [(M+H)<sup>+</sup>, 45%]; CIHRMS *m/z* found 248.1396, calcd. for C<sub>13</sub>H<sub>18</sub>N<sub>3</sub>O<sub>2</sub> (M + H)<sup>+</sup>: 248.1399.

Data for compound **50**: <sup>1</sup>H NMR (300 MHz, CD<sub>3</sub>OD,  $\delta$  ppm)  $\delta$  1.31 (3H, d, *J* = 6.3), 2.85 (1H, m), 2.92 (1H, dd, *J* = 17.5, *J* = 6.5), 3.43 (1H, dd, *J* = 17.5, *J* = 8.7), 3.77 (1H, dd, *J* = 6.3, *J* = 5.8), 3.85 (1H, dt, *J* = 8.7, *J* = 6.3), 4.28 (1H, t, *J* = 6.3), 5.05 (1H, d, *J* = 12.6), 5.26 (1H, d, *J* = 12.6), 7.19-7.27 (2H, m), 7.46-7.51 (1H, m), 7.54-7.60 (1H, m). <sup>13</sup>C NMR (75.4 MHz, CD<sub>3</sub>OD,  $\delta$  ppm)  $\delta$  17.7, 23.2, 58.5, 59.6, 61.4, 71.7, 78.3, 110.4, 118.9, 123.2, 123.4, 134.6, 143.0, 152.3; CIMS 259 [(M)<sup>+</sup>, 30%], 260 [(M+H)<sup>+</sup>, 100%]; CIHRMS *m/z* found 259.1319, calcd. for C<sub>13</sub>H<sub>18</sub>N<sub>3</sub>O<sub>2</sub> (M)<sup>+</sup>: 259.1321.



**Ethyl *N*-Benzyloxycarbonyl-2,3,6-trideoxy-3,6-imino-4,5:7,8-di-*O*-isopropylidene-*D*-glycero-*L*-*altro* and *L*-*allo*-octonates (**58**):** To a solution of ethyl 2,3,6-trideoxy-3,6-imino-4,5:7,8-di-*O*-isopropylidene-*D*-glycero-*L*-*altro*- and *L*-*allo*-octonates<sup>1</sup> (4.07 g, 12.37 mmol) in EtOH:H<sub>2</sub>O (1/1, 80 mL), NaHCO<sub>3</sub> (1.76 g, 21.05 mmol) and CbzCl (1.92 mL, 13.63 mmol) were added. After stirring 12 h at r.t., sat. aq. soln. of NaHCO<sub>3</sub> was added and the mixture was extracted with ethyl acetate. The organic phase was dried over Na<sub>2</sub>SO<sub>4</sub> and concentrated. The residue was used in the next step without further purification.

**Ethyl *N*-Benzyloxycarbonyl-2,3,6-trideoxy-3,6-imino-4,5-*O*-isopropylidene-*D*-glycero-*L*-*altro* and *L*-*allo*-octonates (**59** and **60**):** To a solution of **58** (540 mg, 1.166 mmol) in MeCN (5.3 mL), Zn(NO<sub>3</sub>)<sub>2</sub>·6H<sub>2</sub>O (1.04 g, 3.50 mmol) was added. After heating at 50 °C for 8 h, the solvent was evaporated. The residue was diluted with CH<sub>2</sub>Cl<sub>2</sub> and washed with water and brine. The organic phases were dried, filtered and concentrated. Column chromatography (petroleum ether:AcOEt, 1:1 → 1:3) afforded **60** (10.7 mg, 9%) and **59** (160.1 mg, 66%) as syrups. Data for **60**:  $[\alpha]_{\text{D}}^{22} +39.2$  (*c* 1.0 in CH<sub>2</sub>Cl<sub>2</sub>). <sup>1</sup>H NMR (500 MHz, DMSO-*d*<sub>6</sub>, 363 K, δ ppm) δ 1.18 (3H, t, *J*<sub>H,H</sub> = 7.0, OCH<sub>2</sub>CH<sub>3</sub>), 1.25, 1.32 (3H each, 2s, C(CH<sub>3</sub>)<sub>2</sub>), 2.67 (1H, dd, <sup>2</sup>*J*<sub>2a,2b</sub> = 15.0, *J*<sub>2a,3</sub> = 5.0, 2a-H), 2.82 (1H, dd, *J*<sub>2b,3</sub> = 10.0, 2b-H), 3.28 (1H, dd, <sup>2</sup>*J*<sub>8a,8b</sub> = 11.0, *J*<sub>8a,7</sub> = 6.5, 8a-H), 3.42 (1H, dd, *J*<sub>8b,7</sub> = 5.0, 8b-H), 3.68 (1H, m, H-7), 4.07 (2H, m, OCH<sub>2</sub>CH<sub>3</sub>), 4.15 (1H, brs, OH-8), 4.19 (1H, d, *J*<sub>6,7</sub> = 3.5, 6-H), 4.23 (1H, ddd, *J*<sub>3,4</sub> = 1.7, 3-H), 4.48 (1H, dd, *J*<sub>4,5</sub> = 5.7, 4-H), 4.72 (1H, d, 5-H), 4.83 (1H, brs, OH-7), 5.14 (2H, s, CH<sub>2</sub>Ph), 7.30-7.37 (5H, m, Ph). <sup>13</sup>C NMR (125.7 MHz, DMSO-*d*<sub>6</sub>, 363 K, δ ppm) δ 13.5 (OCH<sub>2</sub>CH<sub>3</sub>), 24.7, 26.7 (C(CH<sub>3</sub>)<sub>2</sub>), 37.3 (C-2), 59.4 (OCH<sub>2</sub>CH<sub>3</sub>), 62.7 (C-8), 62.8 (C-3), 65.8 (C-6), 66.1 (CH<sub>2</sub>Ph), 71.5 (C-7), 82.2 (C-5), 84.0 (C-4), 110.0 (C(CH<sub>3</sub>)<sub>2</sub>), 126.7, 127.3, 127.9, (C

<sup>1</sup> Wightman, H. *et al. Tetrahedron* **1993**, 49, 3827-3840.

arom.), 136.5 (Cq arom.), 154.9 (C=O of Cbz), 170.1 (COOEt). CIHRMS  $m/z$  found 424.1960, calcd. for  $C_{21}H_{29}NO_8+H$ : 424.1971. Data for **59**:  $[\alpha]_D^{22} +66.7$  ( $c$  1.6 in  $CH_2Cl_2$ ).  $^1H$  NMR (500 MHz, DMSO- $d_6$ , 363 K,  $\delta$  ppm)  $\delta$  1.18 (3H, t,  $J_{H,H} = 7.0$ ,  $OCH_2CH_3$ ), 1.27, 1.36 (3H each, 2s,  $C(CH_3)_2$ ), 2.46 (1H, dd,  $^2J_{2a,2b} = 17.0$ ,  $J_{2a,3} = 8.5$ , 2a-H), 3.22 (1H, brs, 2b-H), 3.29 (1H, dt,  $^2J_{8a,8b} = 11.0$ ,  $J_{8a,7} = J_{8a,OH} = 5.7$ , 8a-H), 3.38 (1H, dt,  $J_{8b,7} = J_{8b,OH} = 4.5$ , 8b-H), 3.82 (1H, brs, 6-H), 4.04-4.10 (3H, m, 7-H,  $OCH_2CH_3$ ), 4.22-4.25 (2H, m, 3-H,  $OH$ -8), 4.73 (1H, dd,  $J_{4,3} = 6.0$ , 4-H), 4.77 (1H, t,  $J_{5,4} = J_{5,6} = 6.5$ , 5-H), 5.02, 5.10 (1H each, 2d,  $J_{H,H'} = 12.7$ ,  $CH_2Ph$ ), 7.32-7.37 (5H, m, Ph).  $^{13}C$  NMR (125.7 MHz, DMSO- $d_6$ , 363 K,  $\delta$  ppm)  $\delta$  13.5 ( $OCH_2CH_3$ ), 24.4, 25.3 ( $C(CH_3)_2$ ), 33.6 (C-2), 58.0 (C-3), 59.0 ( $OCH_2CH_3$ ), 62.3 (C-8), 64.8 (C-7), 65.6 ( $CH_2Ph$ ), 70.2 (C-6), 79.3 (C-4), 79.7 (C-5), 109.8 ( $C(CH_3)_2$ ), 127.1, 127.3, 127.8 (C arom.), 136.4 (Cq. arom.), 154.0 (C=O of Cbz), 170.3 (COOEt). CIHRMS  $m/z$  found 424.1955, calcd. for  $C_{21}H_{29}NO_8+H$ : 424.1971.

**(2S,3R,4S,5S)-N-Benzyloxycarbonyl-2-ethoxycarbonylmethyl-5-formyl-3,4-O-**

**isopropylidene-pyrrolidine-3,4-diol (61):** A solution of  $NaIO_4$  (356 mg, 1.65 mmol) in water (6 mL) was added dropwise to a solution of **59** (348 mg, 0.823 mmol) in THF (5 mL) cooled to 0°C. After stirring 3 h at r.t., THF was evaporated and the residue dissolved in  $CH_2Cl_2$  (20 mL) and washed successively with water, sat. aq. soln. of  $NaHCO_3$  and brine. The organic phase was dried, filtered and concentrated to give crude aldehyde **61** (300 mg, 93%) which was used for the next step without further purification.  $^1H$  NMR (300 MHz, DMSO- $d_6$ , 363 K,  $\delta$  ppm)  $\delta$  1.18 (3H, t,  $J_{H,H} = 7.0$ ,  $OCH_2CH_3$ ), 1.29, 1.41 (3H each, 2s,  $C(CH_3)_2$ ), 2.60 (1H, dd,  $^2J_{1'a,1'b} = 16.5$ ,  $J_{1'a,2} = 9.3$ , 1'a-H), 3.18 (1H, m, 1'b-H), 4.06 (2H, m,  $OCH_2CH_3$ ), 4.28 (1H, m, 2-H), 4.46 (1H, brs, 5-H), 4.70 (1H, t,  $J_{3,2} = J_{3,4} = 6.3$ , 3-H), 4.79 (1H, t,  $J_{4,5} = 6.3$ , 4-H), 5.08 (2H, s,  $CH_2Ph$ ), 7.31-7.37 (5H, m, Ph), 9.55 (1H, d,  $J_{CHO,5} = 1.5$ ,  $CHO$ ).  $^{13}C$  NMR (75.4 MHz,

DMSO-*d*<sub>6</sub>, 363 K,  $\delta$  ppm)  $\delta$  13.4 (OCH<sub>2</sub>CH<sub>3</sub>), 24.4, 25.3 (C(CH<sub>3</sub>)<sub>2</sub>), 33.3 (C-1'), 57.7 (C-2), 59.1 (OCH<sub>2</sub>CH<sub>3</sub>), 66.2 (CH<sub>2</sub>Ph), 70.8 (C-5), 77.1 (C-4), 78.8 (C-3), 111.2 (C(CH<sub>3</sub>)<sub>2</sub>), 127.1, 127.4, 127.8, (C arom.), 135.8 (Cq arom.), 154.1 (C=O of Cbz), 169.8 (COOEt), 197.7 (CHO). CIHRMS *m/z* found 392.1711, cald. for C<sub>20</sub>H<sub>25</sub>NO<sub>7</sub>+H: 392.1709.

**(2*S*,3*R*,4*S*,5*S*)-*N*-Benzyloxycarbonyl-2-ethoxycarbonylmethyl-5-carboxy-3,4-*O*-isopropylidene-pyrrolidine-3,4-diol (**62**):** To a stirred solution of aldehyde **61** (300 mg, 0.767 mmol) and 2-methyl-2-butene (0.85 mL) in *t*-butanol (9.4 mL), a solution of NaClO<sub>2</sub> (0.77 g, 18.53 mmol) and NaH<sub>2</sub>PO<sub>4</sub> (1.33 mg, 18.53 mmol) in water (7.5 mL) was added. The reaction mixture was stirred overnight at r.t. Then, the solvent was evaporated, the resulting residue was dissolved in CH<sub>2</sub>Cl<sub>2</sub>, washed with water, the organic phase dried (Na<sub>2</sub>SO<sub>4</sub>) and the solvent evaporated to give **62** (272 mg, 87 %), which was used in the next step without further purification.

**(2*S*,3*S*,4*R*,5*S*)-*N*-Benzyloxycarbonyl-2-(2-aminophenylcarbamoyl)-5-ethoxycarbonylmethyl-3,4-*O*-isopropylidene-pyrrolidine-3,4-diol (**63**):** To a solution of **62** (250 mg, 0.614 mmol) and *o*-phenylenediamine (72.8 mg, 0.676 mmol) in DMF, PyBOP (350 mg, 1.35 mmol) and DIPEA (208  $\mu$ L, 1.35 mmol) were added, and the mixture was stirred at r.t. for 12 h. Then, the solvent was evaporated, the resulting residue was dissolved in CH<sub>2</sub>Cl<sub>2</sub> and washed with HCl 1N, sat. aq. soln. of NaHCO<sub>3</sub> and brine. The resulting crude was purified by column chromatography (petroleum ether:AcOEt, 4:1 $\rightarrow$ 1:1) to give **63** (268 mg, 88%).  $[\alpha]_{\text{D}}^{22}$  +44.8 (*c* 1.3 in CH<sub>2</sub>Cl<sub>2</sub>). <sup>1</sup>H NMR (500 MHz, DMSO-*d*<sub>6</sub>, 363 K,  $\delta$  ppm)  $\delta$  1.20 (3H, t,  $J_{\text{H,H}}$  = 7.5, OCH<sub>2</sub>CH<sub>3</sub>), 1.33, 1.46 (3H each, 2s, C(CH<sub>3</sub>)<sub>2</sub>), 2.57 (1H, dd,  $J_{1'a,1'b}$  = 16.5,  $J_{1'a,5}$  = 9.5, 1'a-H), 3.23 (1H, m, 1'b-H), 4.09 (2H, m, OCH<sub>2</sub>CH<sub>3</sub>), 4.44 (1H, m, 5-H), 4.68 (1H, s, 2-H), 4.83-4.87 (2H, m, 4-H, 3-H), 5.05, 5.13 (1H each, 2d,  $J_{\text{H,H}'}$  = 14.0, CH<sub>2</sub>Ph), 6.53 (1H, t,  $J$  = 7.0,

Ar), 6.75 (1H, d,  $J = 6.9$ , Ar), 6.93 (1H, t,  $J = 6.8$ , Ar), 7.11 (1H, d,  $J = 7.0$ , Ar), 7.27-7.35 (5H, m, Ph), 9.43 (1H, brs, NH).  $^{13}\text{C}$  NMR (125.7 MHz, DMSO- $d_6$ , 363 K,  $\delta$  ppm)  $\delta$  13.5 (OCH<sub>2</sub>CH<sub>3</sub>), 24.4, 25.3 (C(CH<sub>3</sub>)<sub>2</sub>), 34.0 (C-1'), 58.4 (C-5), 59.1 (OCH<sub>2</sub>CH<sub>3</sub>), 66.0 (CH<sub>2</sub>Ph), 66.3 (C-2), 78.9, 81.1 (C-4, C-3), 110.9 (C(CH<sub>3</sub>)<sub>2</sub>), 115.5, 115.8, 122.2, 125.1, 125.8, 126.9, 127.3, 127.8, 135.9, 141.6 (C arom.), 154.8 (C=O of Cbz), 168.2 (CONH), 170.0 (COOEt). CIHRMS  $m/z$  found 497.2157, cald. for C<sub>26</sub>H<sub>31</sub>N<sub>3</sub>O<sub>7</sub>: 497.2162.

**(2S,3S,4R,5S)-N-Benzoyloxycarbonyl-2-(1H-benzoimidazol-2-yl)-5-**

**ethoxycarbonylmethyl-3,4-O-isopropylidene-pyrrolidine-3,4-diol (64):** Compound **63** (250 mg, 0.503 mmol) was dissolved in glacial AcOH (8.5 mL) and the mixture was stirred for 5 h at 50 °C. Then, the solvent was evaporated and the resulting residue was purified by column chromatography (petroleum ether:AcOEt 1:1) to give pure **64** (231 mg, 96 %).  $[\alpha]_{\text{D}}^{22} +98.4$  ( $c$  1.3 in CH<sub>2</sub>Cl<sub>2</sub>).  $^1\text{H}$  NMR (500 MHz, DMSO- $d_6$ , 363 K,  $\delta$  ppm)  $\delta$  1.21 (3H, t,  $J_{\text{H,H}} = 7.0$ , OCH<sub>2</sub>CH<sub>3</sub>), 1.30, 1.48 (3H each, 2s, C(CH<sub>3</sub>)<sub>2</sub>), 2.66 (1H, dd,  $J_{1'a,1'b} = 17.0$ ,  $J_{1'a,5} = 9.0$ , 1'a-H), 3.35 (1H, brd, 1'b-H), 4.11 (2H, m, OCH<sub>2</sub>CH<sub>3</sub>), 4.68 (1H, m, 5-H), 4.81 (1H, d,  $J_{3,4} = 5.8$ , 3-H), 4.97 (1H, t,  $J_{4,5} = 5.8$ , 4-H), 4.91, 4.99 (1H each, 2d,  $J_{\text{H,H}} = 12.5$ , CH<sub>2</sub>Ph), 5.21 (1H, s, 2-H), 7.06-7.55 (9H, m, Ar), 12.29 (1H, brs, NH).  $^{13}\text{C}$  NMR (125.7 MHz, DMSO- $d_6$ , 363 K,  $\delta$  ppm)  $\delta$  13.5 (OCH<sub>2</sub>CH<sub>3</sub>), 24.4, 25.3 (C(CH<sub>3</sub>)<sub>2</sub>), 33.7 (C-1'), 58.1 (C-5), 59.1 (OCH<sub>2</sub>CH<sub>3</sub>), 61.2 (C-2), 65.7 (CH<sub>2</sub>Ph), 79.0 (C-4), 82.0 (C-3), 110.9 (C(CH<sub>3</sub>)<sub>2</sub>), 118.3-135.9 (Ar), 152.2 (C=N), 154.4 (C=O of Cbz), 170.1 (COOEt). CIHRMS  $m/z$  found 480.2125, cald. for C<sub>26</sub>H<sub>29</sub>N<sub>3</sub>O<sub>6</sub>+H: 480.2135.

**(2S,3S,4R,5S)-N-tert-Butoxycarbonyl-2-(1H-benzoimidazol-2-yl)-5-**

**ethoxycarbonylmethyl-3,4-O-isopropylidene-pyrrolidine-3,4-diol (65):** To a solution of compound **64** (310 mg, 0.647 mmol) in THF (2 mL) and a few drops of MeOH, Pd/C

(38.7 mg) and (Boc)<sub>2</sub>O (155 mg, 0.711 mmol) were added. The mixture was hydrogenated overnight. After filtration through celite, the filtrate was purified by column chromatography (petroleum ether:AcOEt 2:1) to give **65** (230.2 mg, 80%).  $[\alpha]_{\text{D}}^{22} +73.2$  (*c* 0.9 in CH<sub>2</sub>Cl<sub>2</sub>). <sup>1</sup>H NMR (500 MHz, DMSO-*d*<sub>6</sub>, 363 K, δ ppm) δ 1.11 (9H, s, C(CH<sub>3</sub>)), 1.23 (3H, t, *J*<sub>H,H</sub> = 7.1, OCH<sub>2</sub>CH<sub>3</sub>), 1.29, 1.49 (3H each, 2s, C(CH<sub>3</sub>)<sub>2</sub>), 2.60 (1H, dd, *J*<sub>1'a,1'b</sub> = 16.5, *J*<sub>1'a,5</sub> = 4.5, 1'a-H), 3.29 (1H, dd, *J*<sub>1'b,5</sub> = 10.0, H-1'b), 4.12 (2H, q, OCH<sub>2</sub>CH<sub>3</sub>), 4.62 (1H, ddd, *J*<sub>5,4</sub> = 6.2, 5-H), 4.74 (1H, d, *J*<sub>3,4</sub> = 6.2, 3-H), 4.95 (1H, t, 4-H), 5.05 (1H, s, 2-H), 7.15-7.51 (9H, m, Ar), 12.25 (1H, brs, NH). <sup>13</sup>C NMR (125.7 MHz, DMSO-*d*<sub>6</sub>, 363 K, δ ppm) δ 13.6 (OCH<sub>2</sub>CH<sub>3</sub>), 24.4, 25.3 (C(CH<sub>3</sub>)<sub>2</sub>), 27.3 (C(CH<sub>3</sub>)<sub>3</sub>), 33.9 (C-1'), 57.8 (C-5), 59.1 (OCH<sub>2</sub>CH<sub>3</sub>), 61.4 (C-2), 78.8 (C-4), 79.2 (C(CH<sub>3</sub>)<sub>3</sub>), 82.1 (C-3), 111.0 (C(CH<sub>3</sub>)<sub>2</sub>), 111.1-121.2 (Ar), 153.1 (C=N), 154.0 (C=O of Cbz), 170.3 (COOEt). CIHRMS *m/z* found 446.2294, cald. for C<sub>23</sub>H<sub>31</sub>N<sub>3</sub>O<sub>6</sub> + H: 446.2291.

**(2S,3S,4R,5S)-N-tert-Butoxycarbonyl-2-(1H-benzoimidazol-2-yl)-5-(2-**

**hydroxyethyl)-3,4-O-isopropylidene-pyrrolidine-3,4-diol (66):** To a cooled solution of **65** (100 mg, 0.215 mmol) in dry THF (10 mL), LiAlH<sub>4</sub> (74 mg) was added. After 1 h at 0 °C, the reaction was quenched with H<sub>2</sub>O (500 μL) and 1M NaOH (200 μL). The reaction mixture was dried over Na<sub>2</sub>SO<sub>4</sub> and purified by column chromatography (petroleum ether:AcOEt 1:4) to give **66** (87 mg, 96%).  $[\alpha]_{\text{D}}^{22} +61.0$  (*c* 1.5 in CH<sub>2</sub>Cl<sub>2</sub>). <sup>1</sup>H NMR (500 MHz, DMSO-*d*<sub>6</sub>, 363 K, δ ppm) δ 1.12 (9H, s, C(CH<sub>3</sub>)<sub>3</sub>), 1.31, 1.50 (3H each, 2s, C(CH<sub>3</sub>)<sub>2</sub>), 1.94 (1H, m, 1'a-H), 2.50 (1H, m, 1'b-H), 3.55-3.64 (2H, m, 2'a-H, 2'b-H), 4.26 (1H, m, 5-H), 4.73 (1H, d, *J*<sub>3,4</sub> = 6.0, 3-H), 4.86 (1H, dd, *J*<sub>4,5</sub> = 5.5, 4-H), 5.00 (1H, s, 2-H), 7.14 (2H, m, Ar), 7.50 (2H, brs, Ar), 12.25 (1H, brs, NH). <sup>13</sup>C NMR (125.7 MHz, DMSO-*d*<sub>6</sub>, 363 K, δ ppm) δ 24.5, 25.9 (C(CH<sub>3</sub>)<sub>2</sub>), 27.3 (C(CH<sub>3</sub>)<sub>3</sub>), 31.4 (C-1'), 58.2 (C-2'), 58.9 (C-5), 62.2 (C-2), 78.6 (C(CH<sub>3</sub>)<sub>3</sub>), 79.5 (C-4), 80.1 (C-3),

110.6 ( $C(CH_3)_2$ ), 111.1-121.0 (Ar), 153.5, 154.0 (C=N, C=O of Boc). CIMS 404  $[(M+H)^+]$ , 98%]; CIHRMS  $m/z$  found 404.2201, cald. for  $C_{21}H_{30}N_3O_5 + H$ : 404.2185.

**(2S,3S,4R,5S)-2-(1H-benzoimidazol-2-yl)-5-(2-hydroxyethyl)-pyrrolidine-3,4-diol**

**(18c)**: Compound **66** (49.3 mg, 0.122 mmol) was treated with 4N HCl (4 mL) and stirred for 2 h at r.t. After evaporation of the solvent, the residue was treated with sat. aq. soln. of  $NH_4OH$  for 1 h. Then, elimination of the solvent and purification through chromatography column (DCM/MeOH/ $NH_4OH$  10:1:0.1  $\rightarrow$  2:1:0.1) afforded **18c** (30 mg, 92%).  $[\alpha]_D^{22}$  -23.0 ( $c$  1.0 in MeOH).  $^1H$  NMR (300 MHz,  $CD_3OD$ ,  $\delta$  ppm)  $\delta$  2.01 (2H, m, 1'a-H, 1'b-H), 3.75 (2H, m, 2'a-H, 2'b-H), 4.06 (1H, td,  $J_{5,1'a} = J_{5,1'b} = 6.9$ ,  $J_{5,4} = 3.0$ , 5-H), 4.29 (1H, t,  $J_{4,3} = 3.0$ , 4-H), 4.67-4.75 (2H, m, 2-H, 3-H).  $^{13}C$  NMR (125.7 MHz,  $CD_3OD$ ,  $\delta$  ppm)  $\delta$  31.6 (C-1'), 59.4 (C-2), 59.9 (C-2'), 62.2 (C-5), 73.2 (C-4), 78.8 (C-3), 116.8, 120.7, 125.9, 140.1 (C arom.), 150.3 (C=N). CIHRMS  $m/z$  found 264.1353, cald. for  $C_{13}H_{17}N_3O_3+H$ : 264.1348.

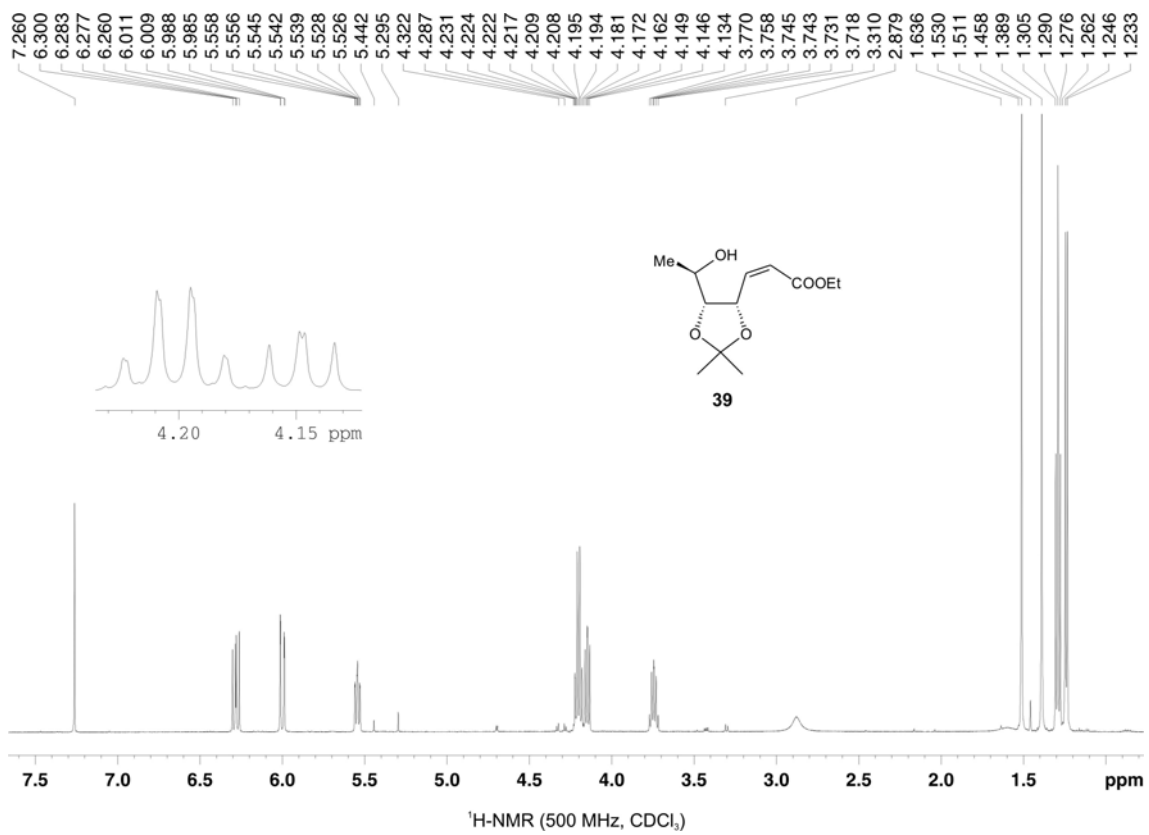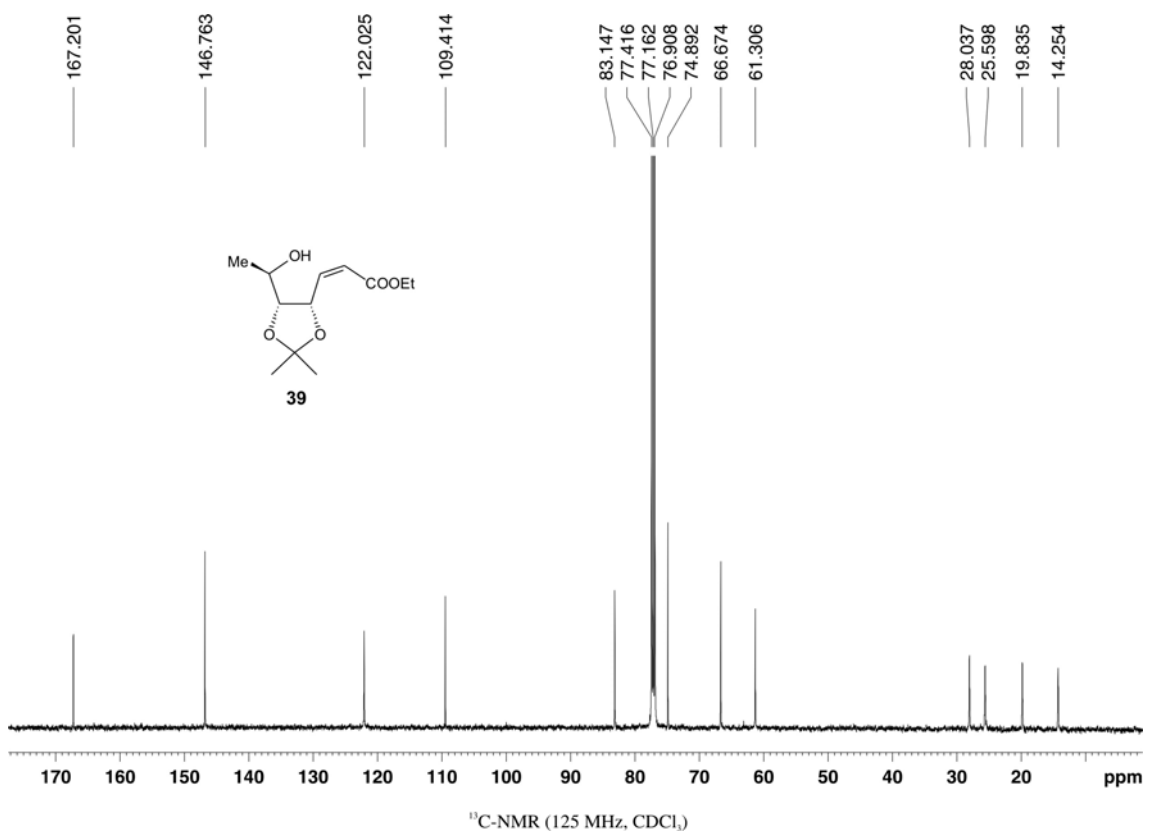

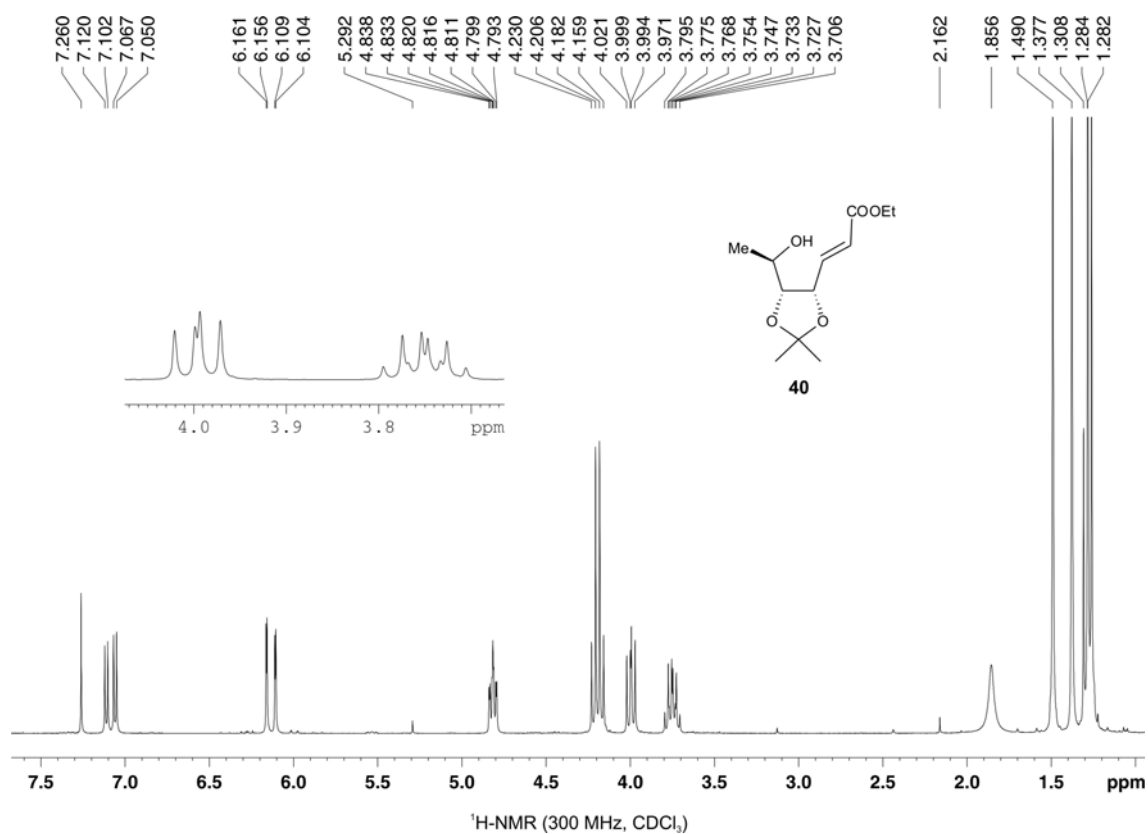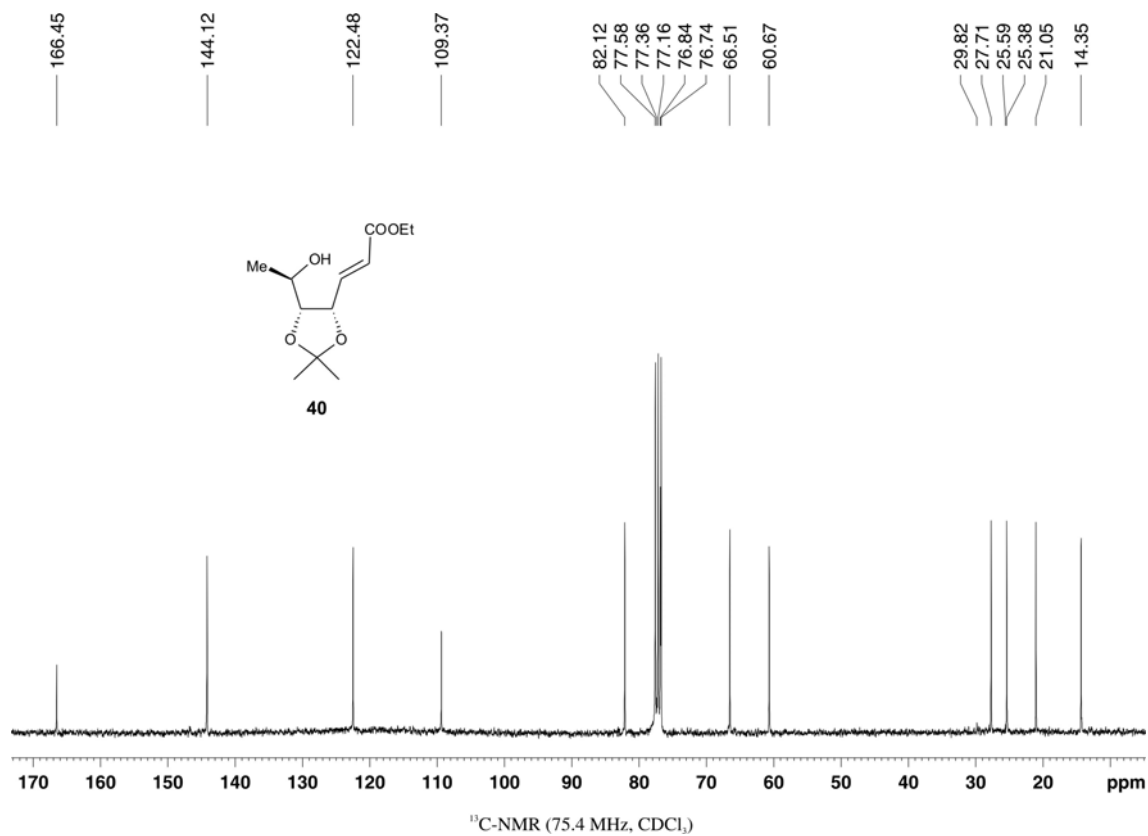



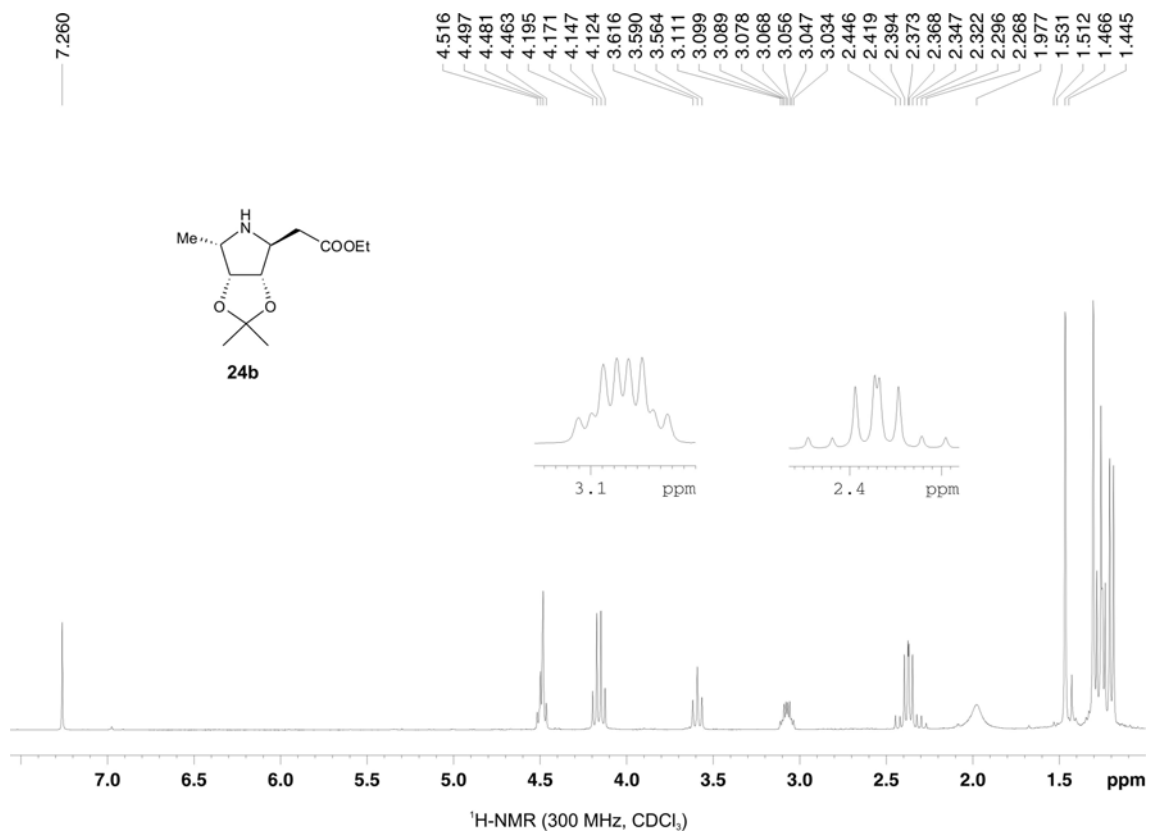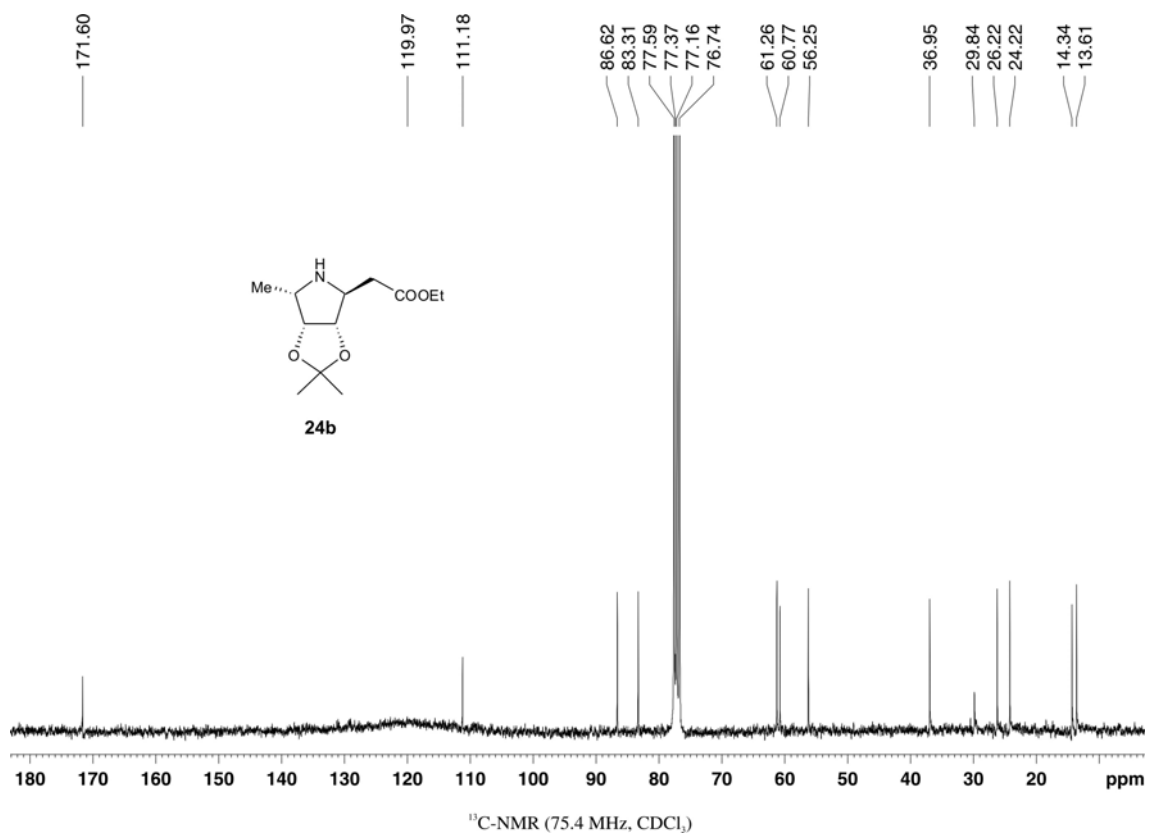

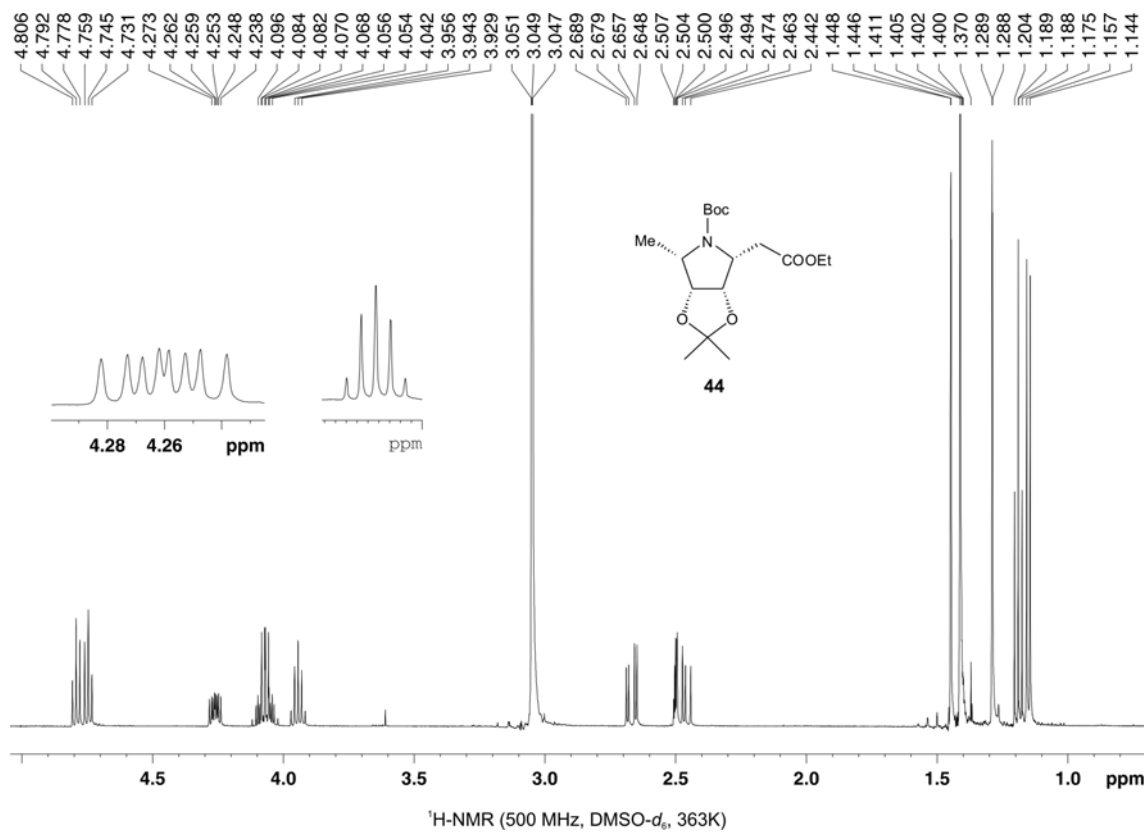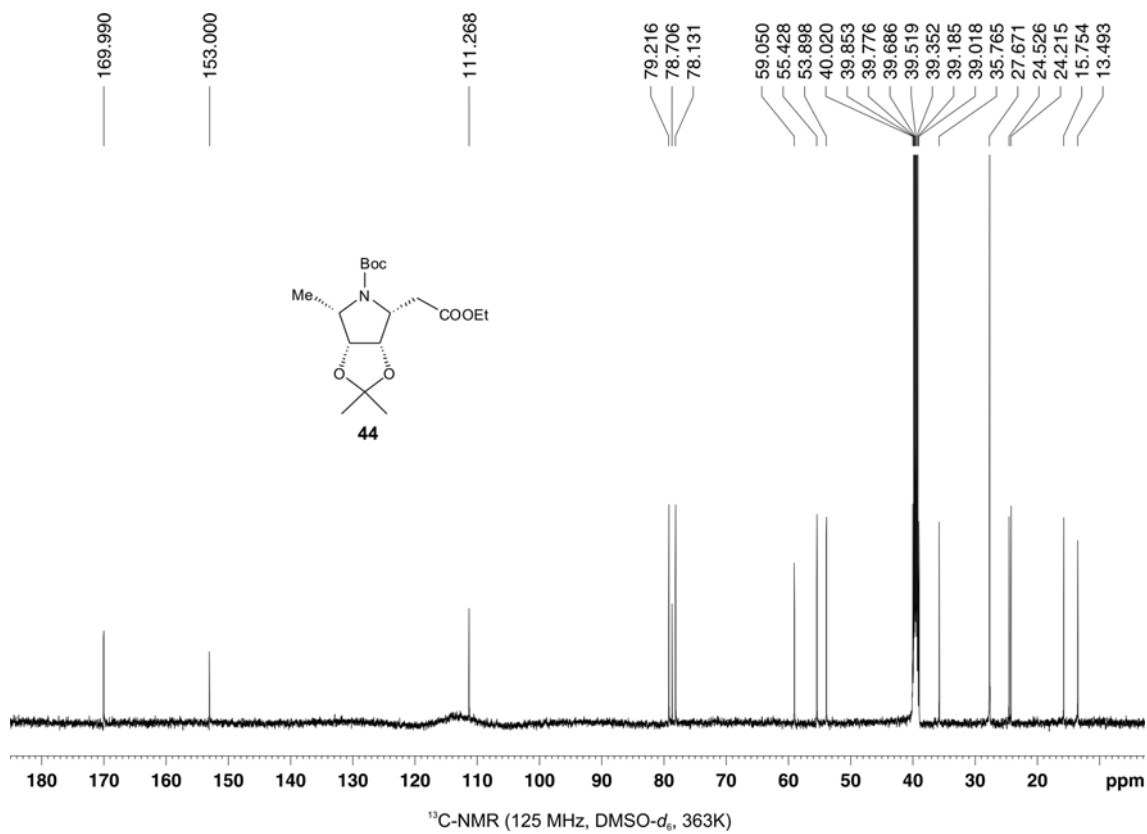

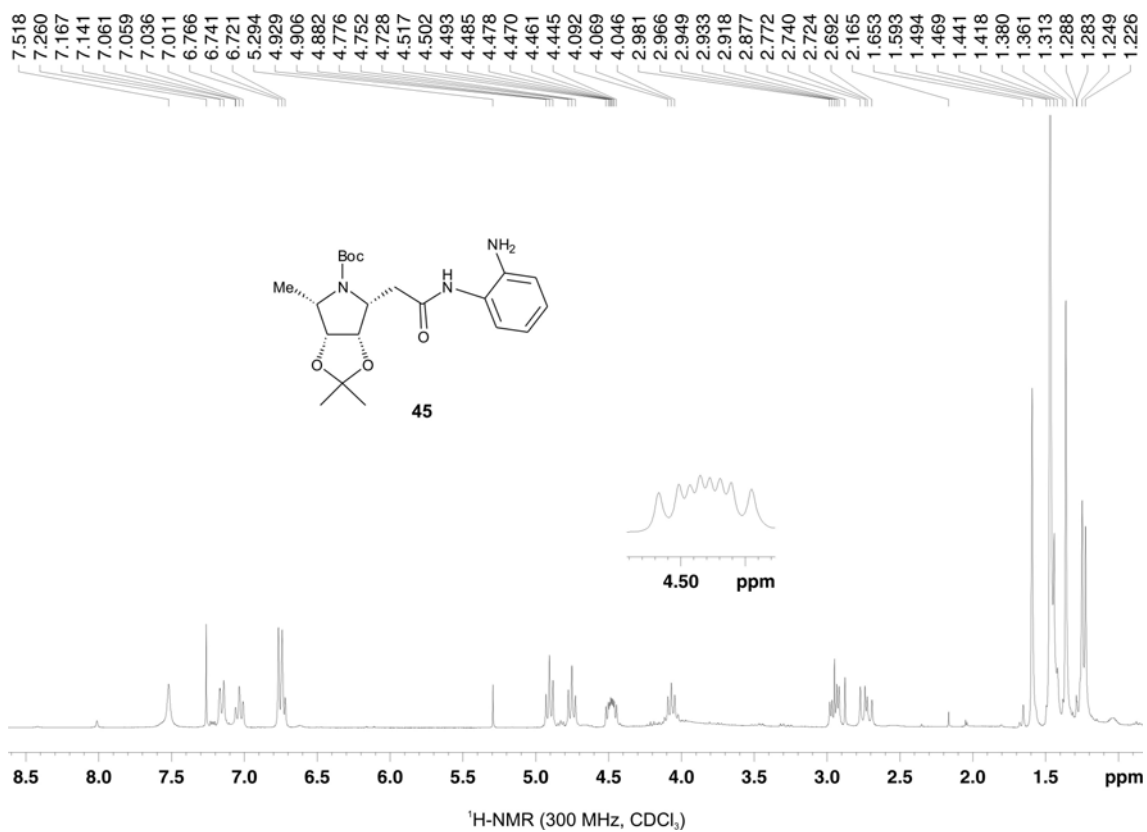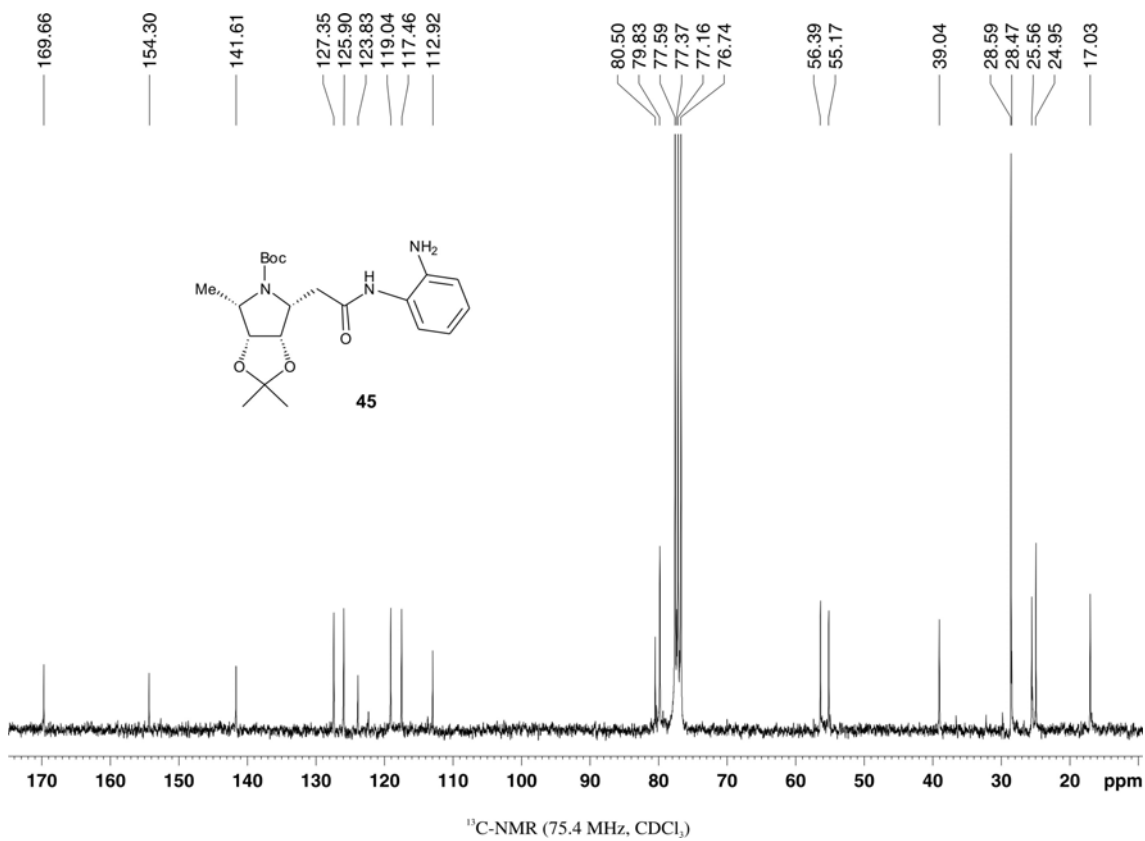

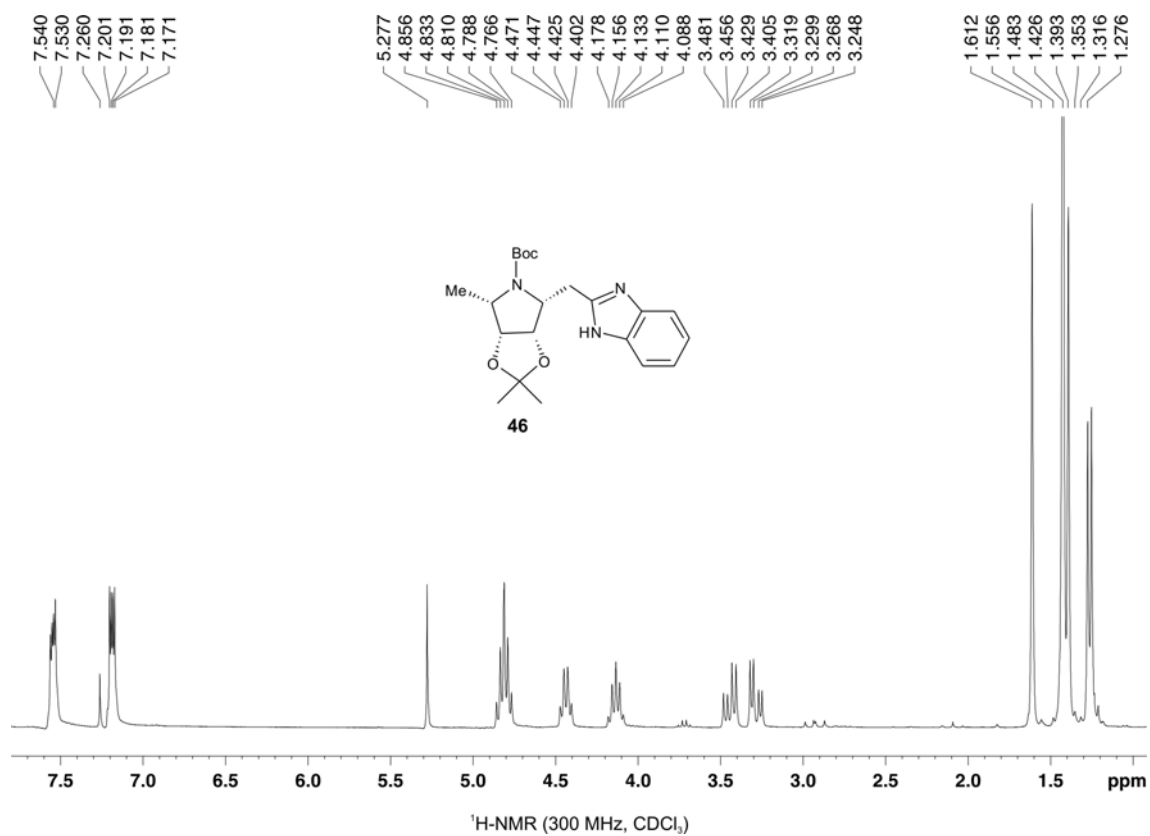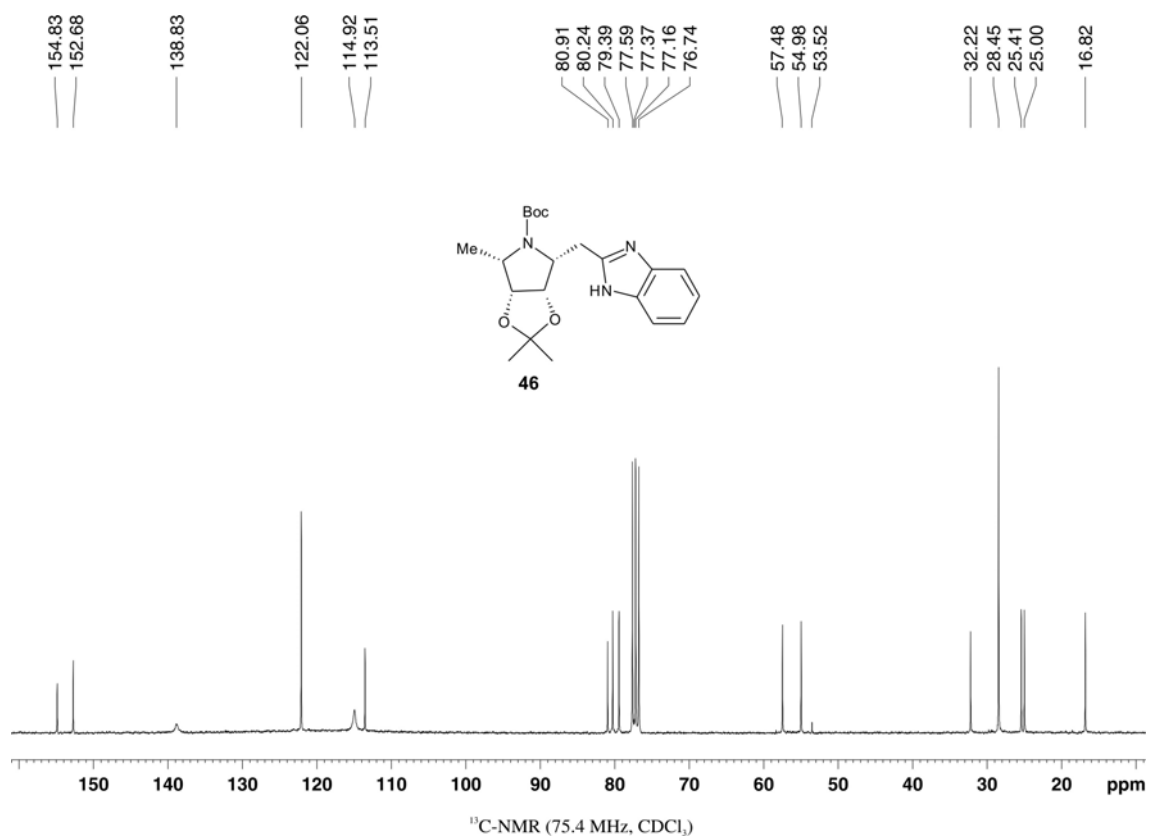

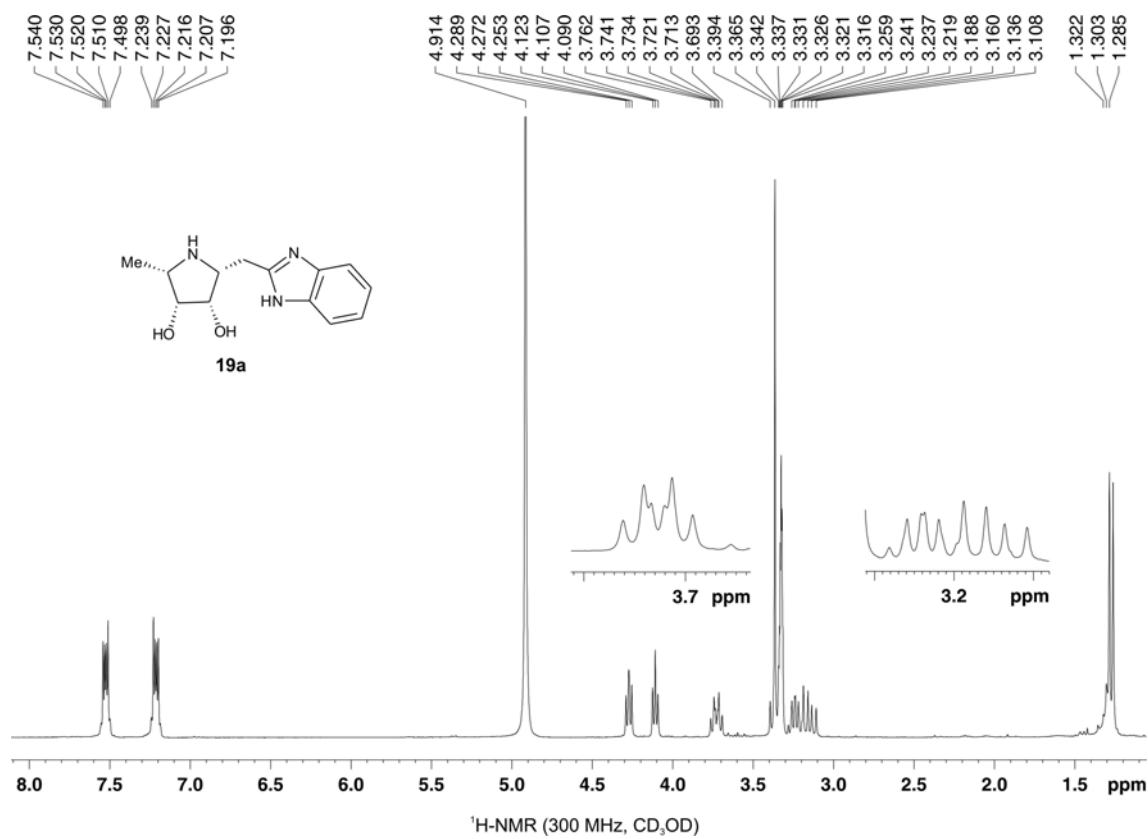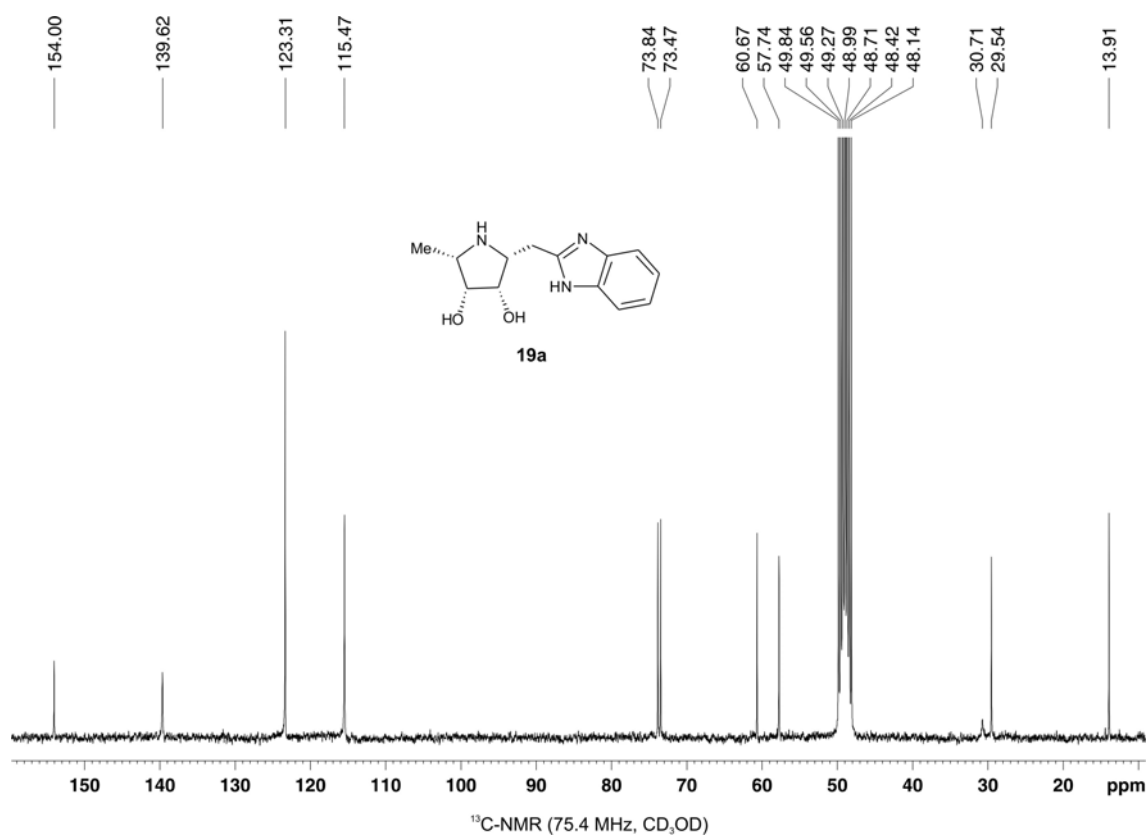

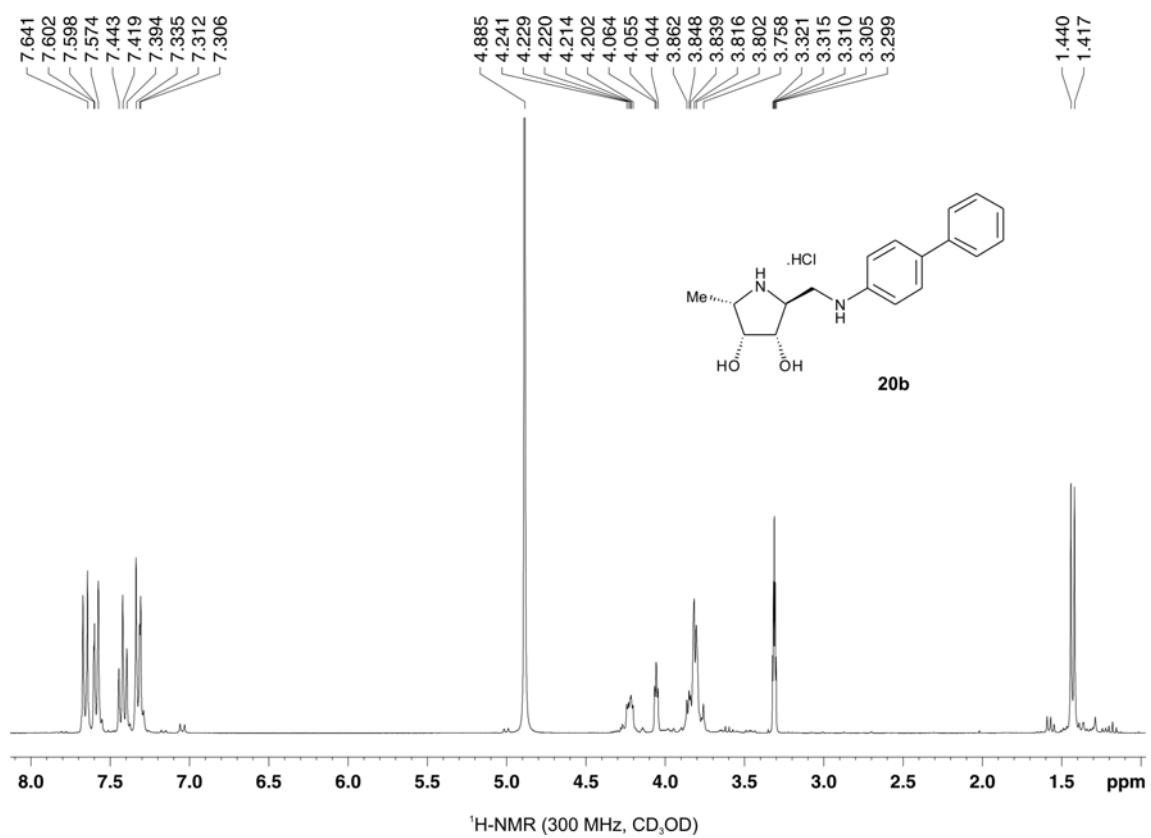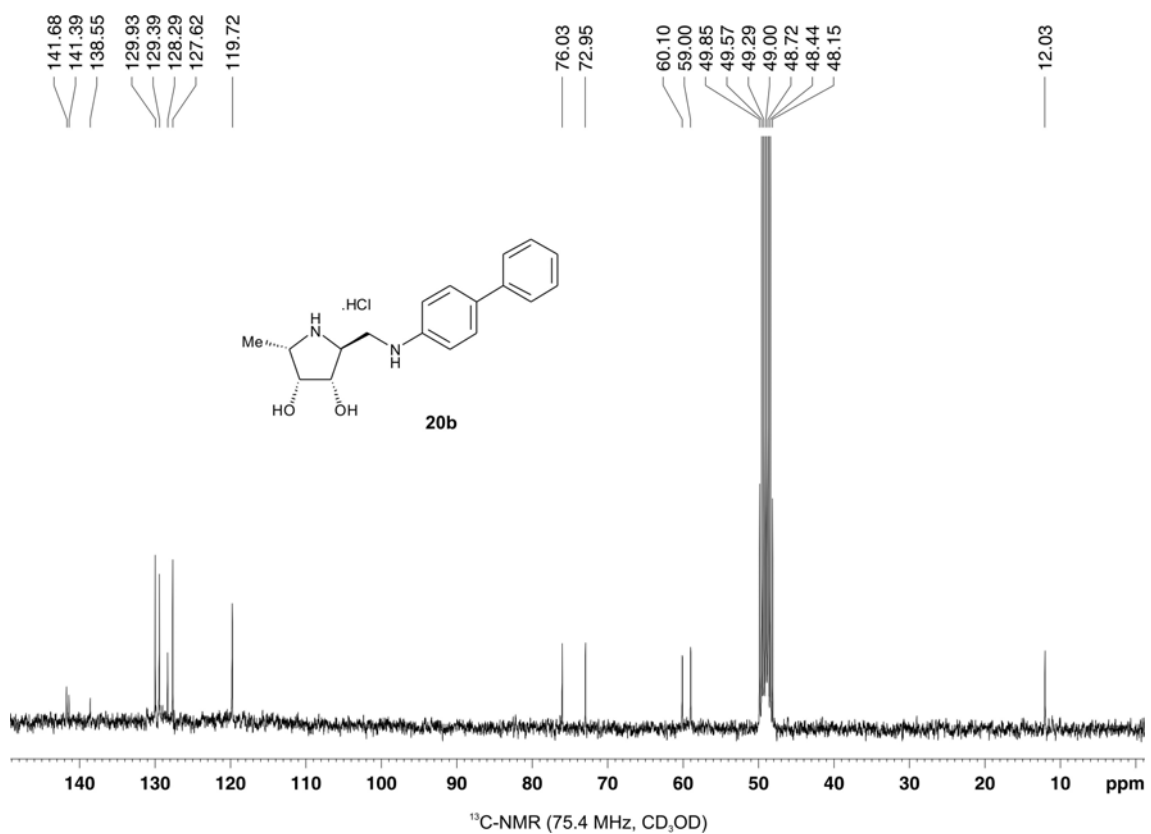

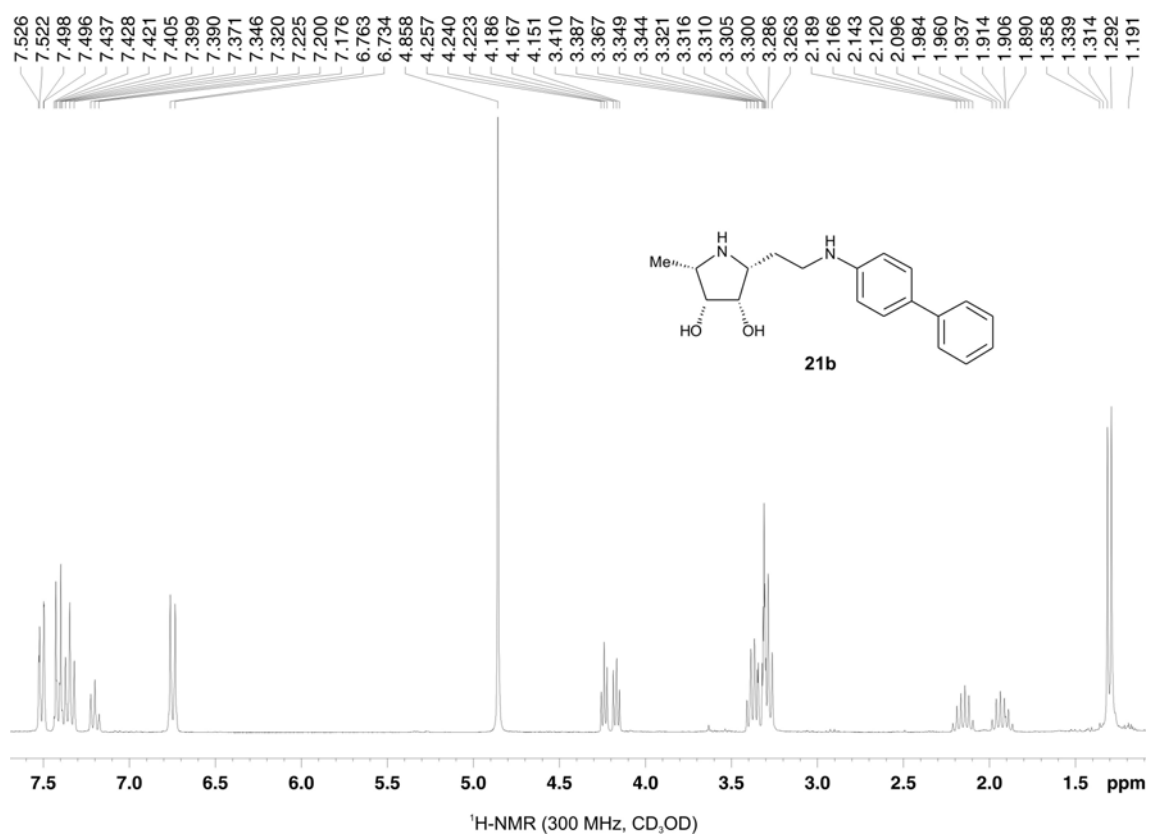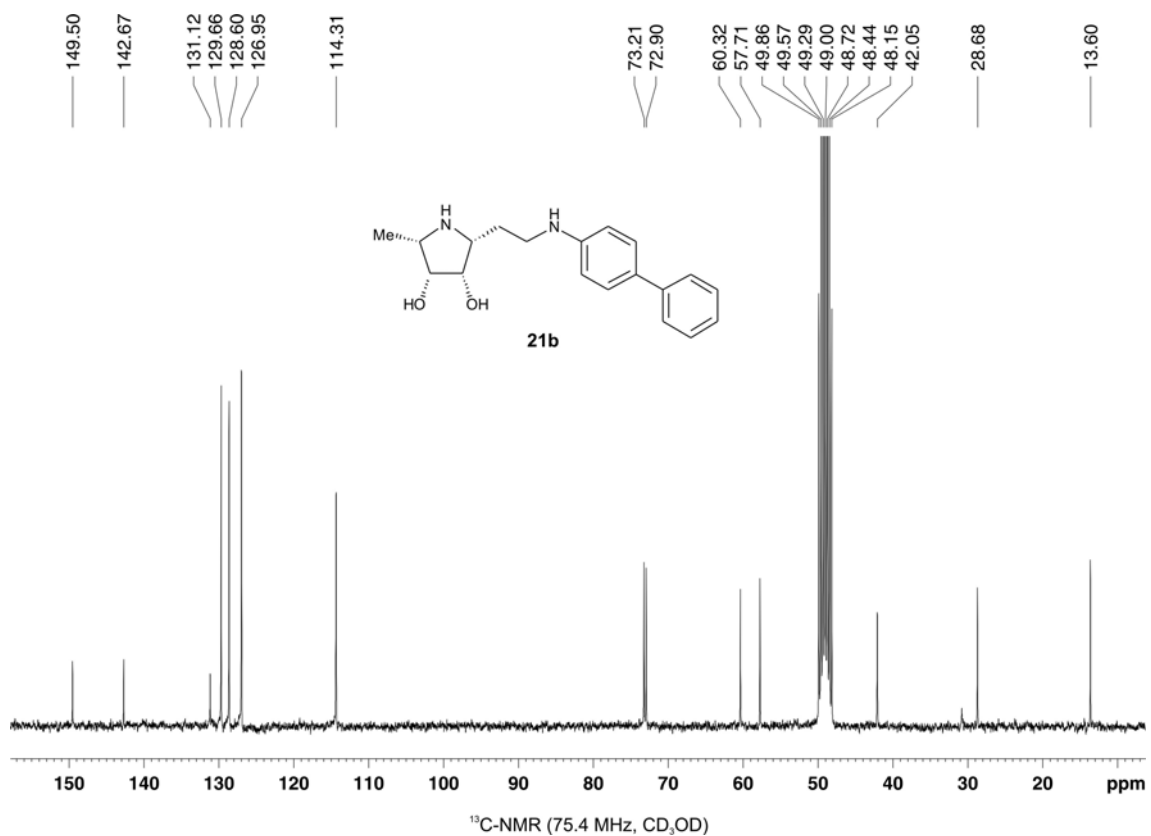

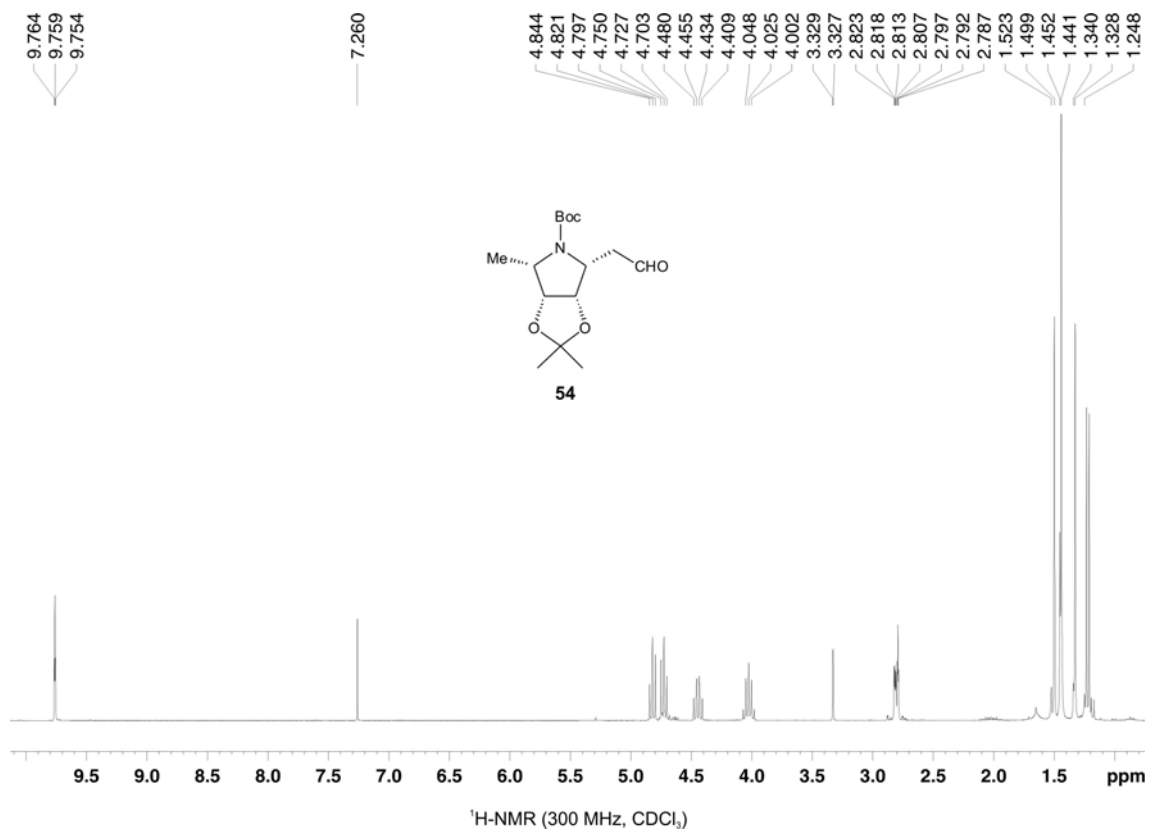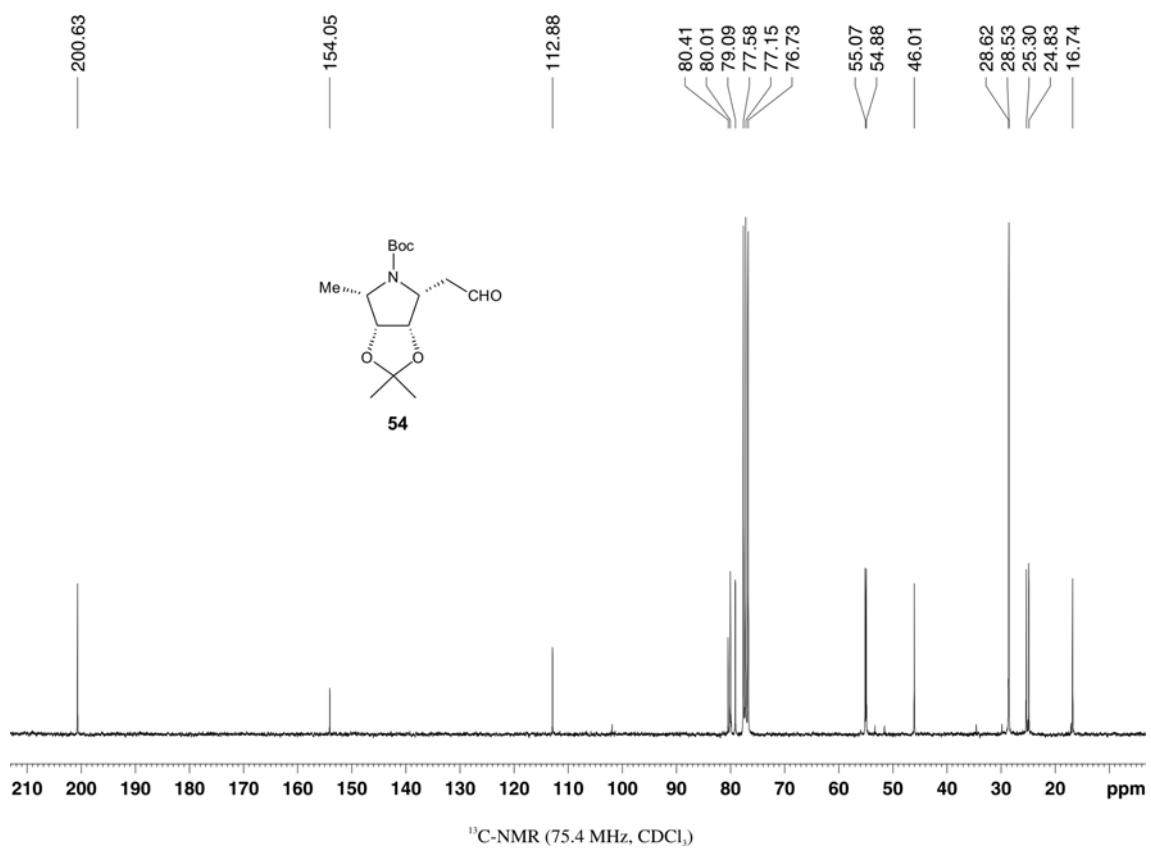



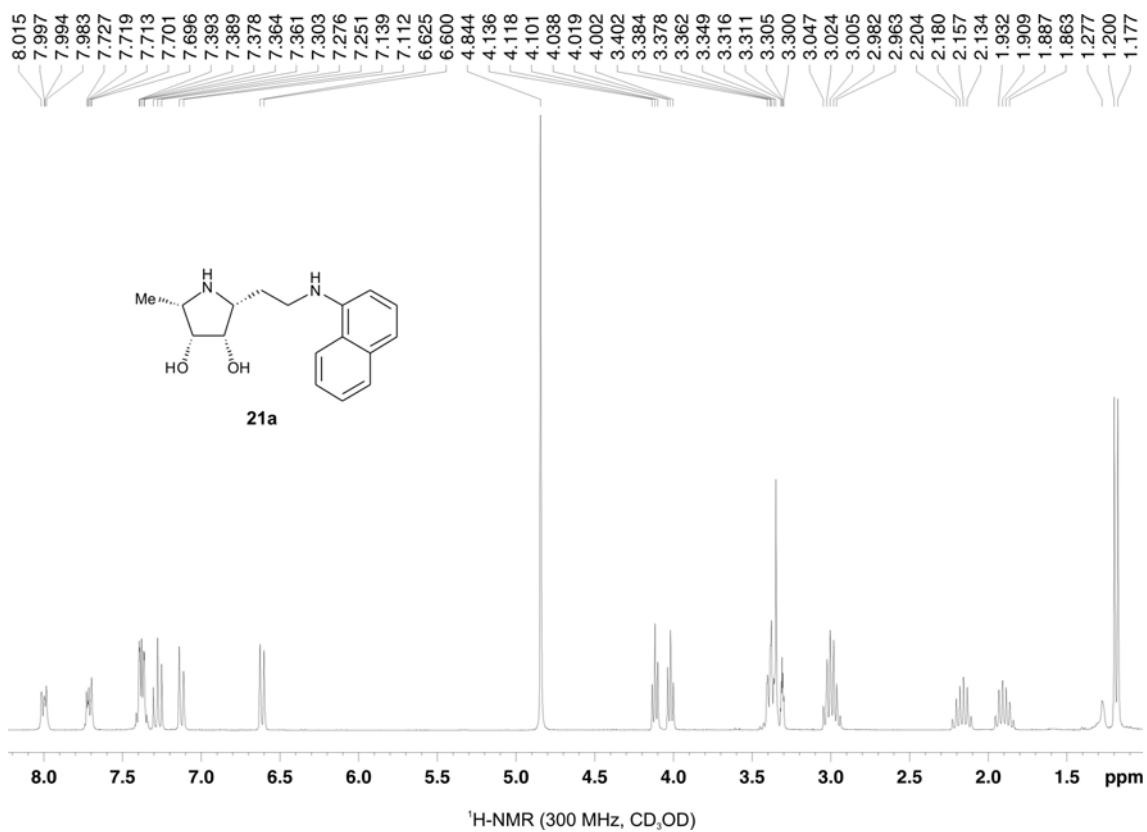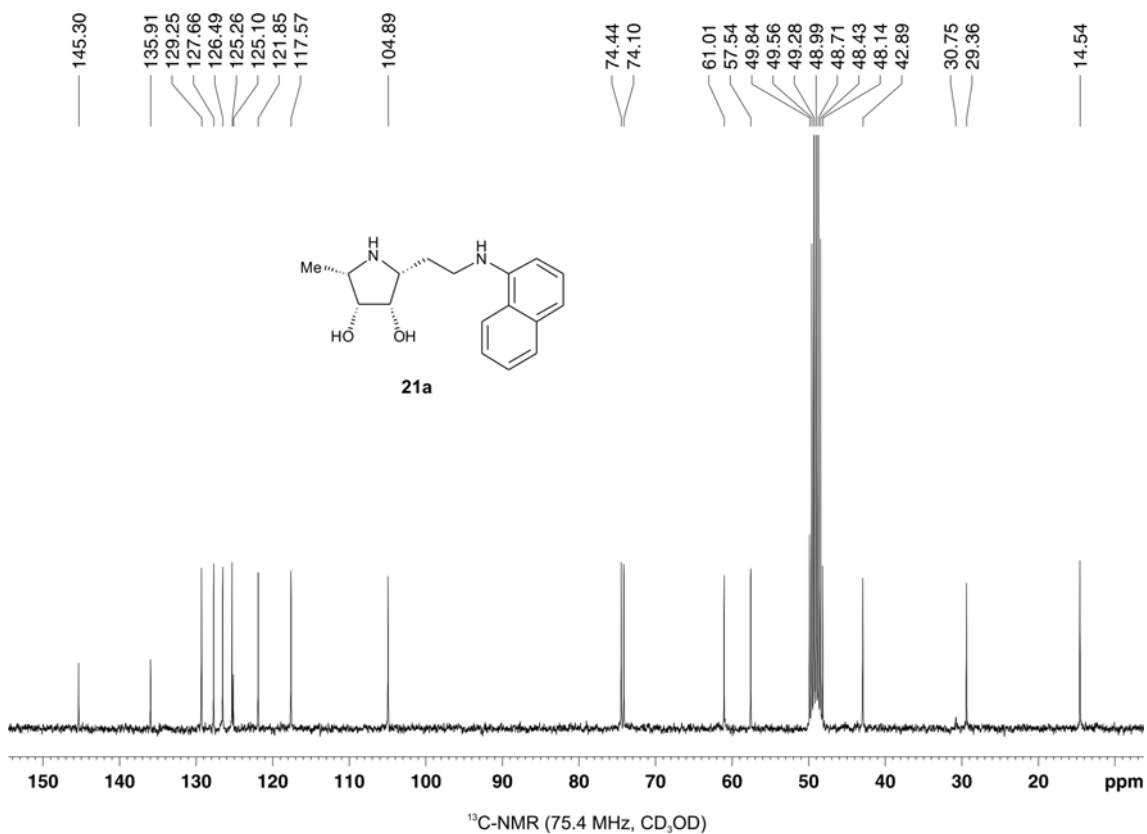

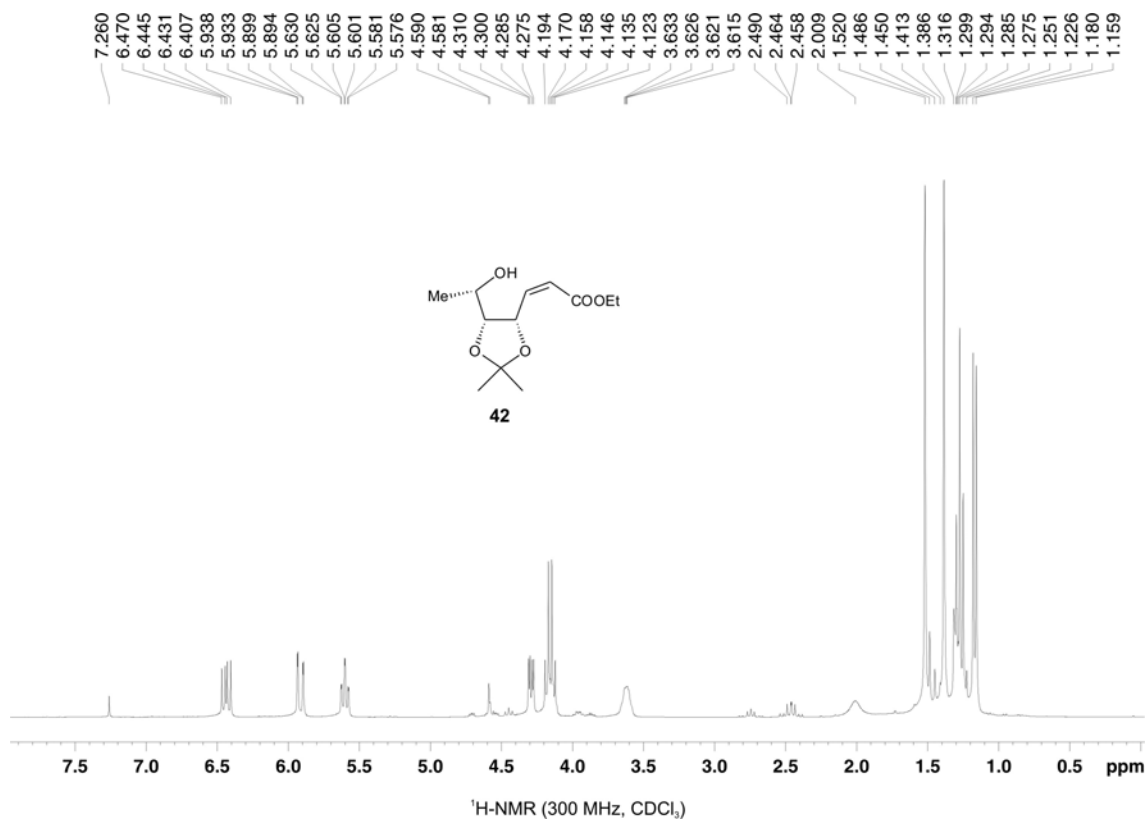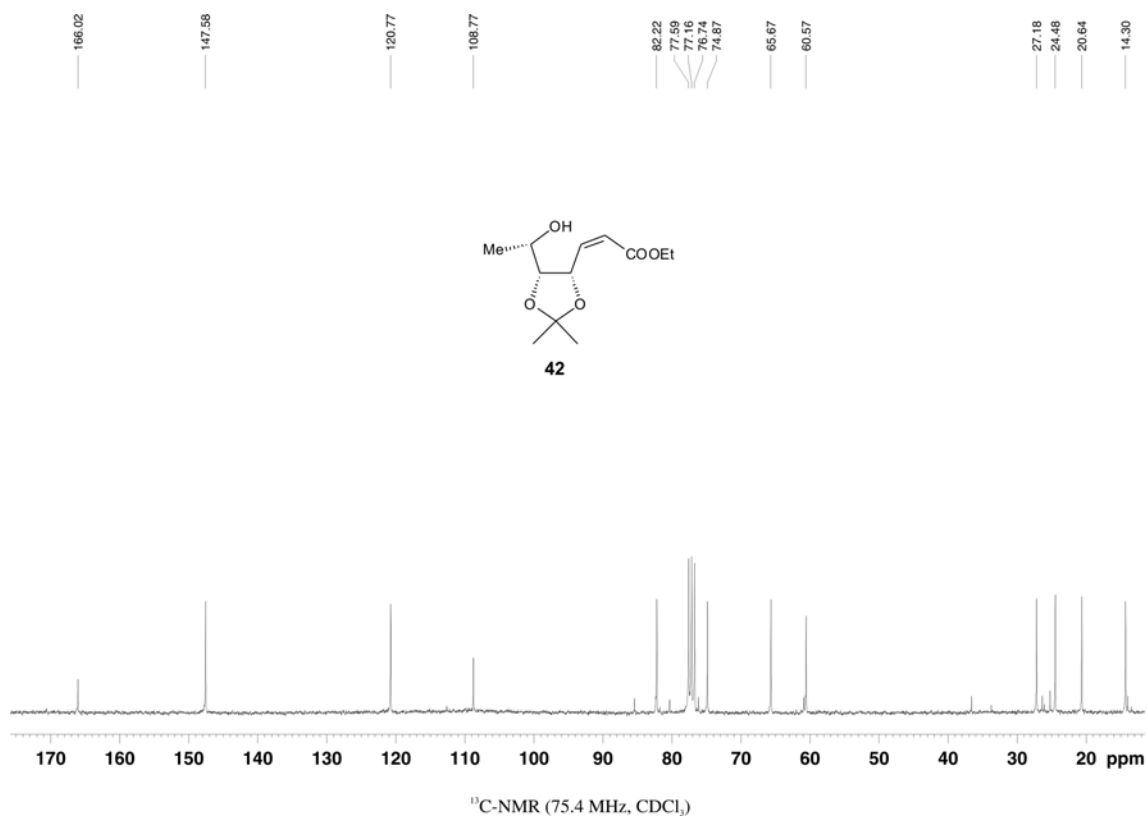

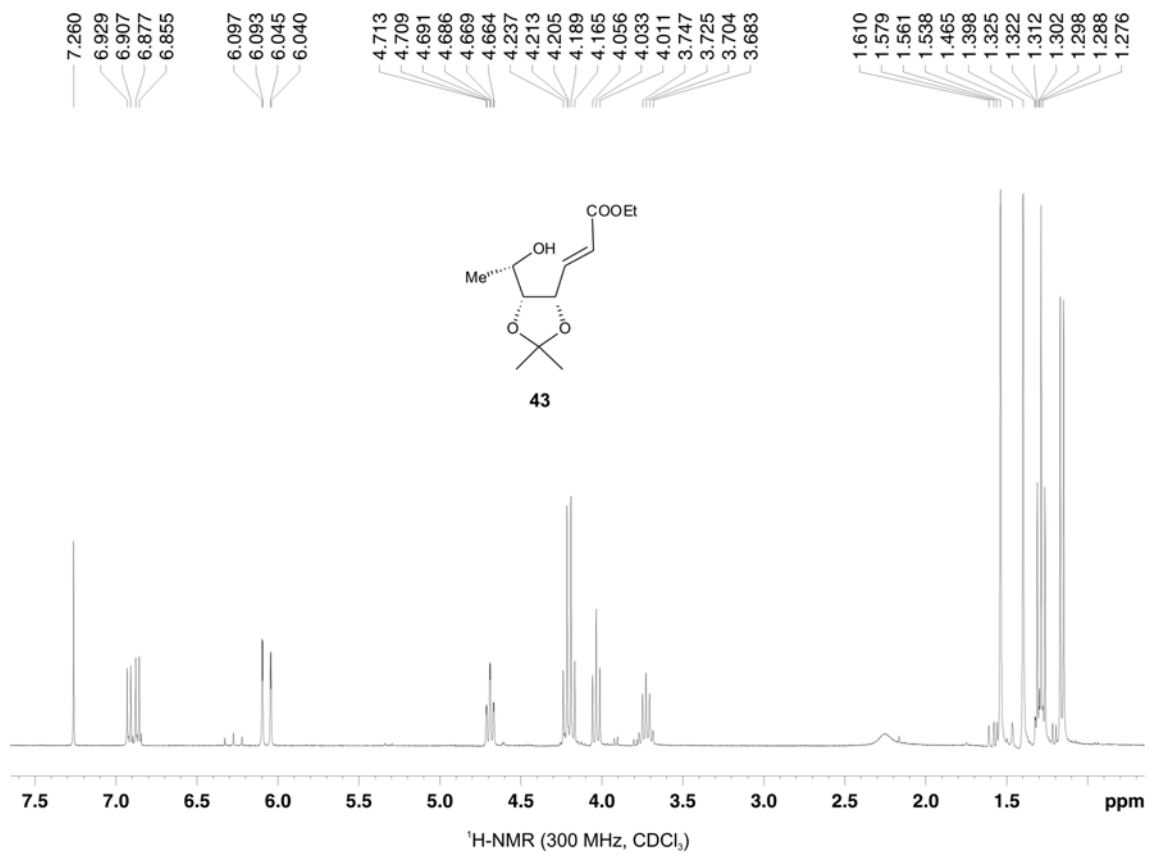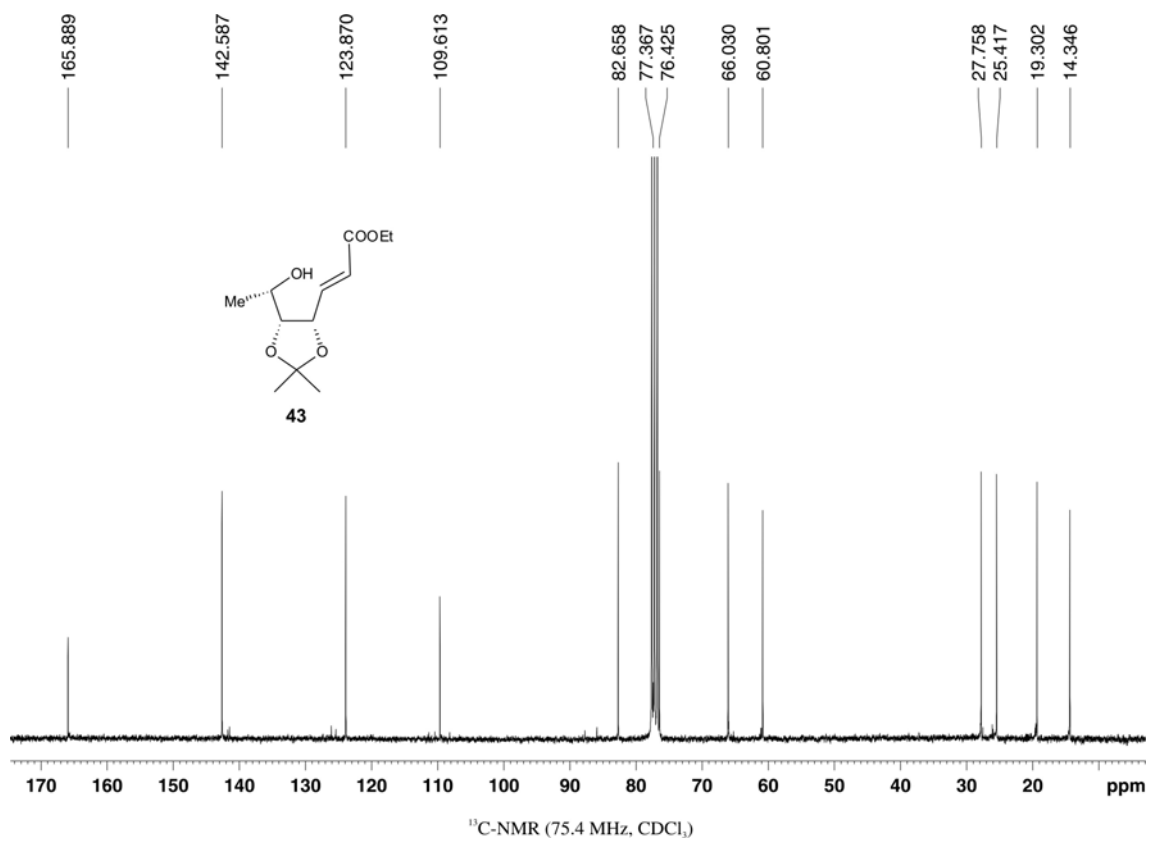

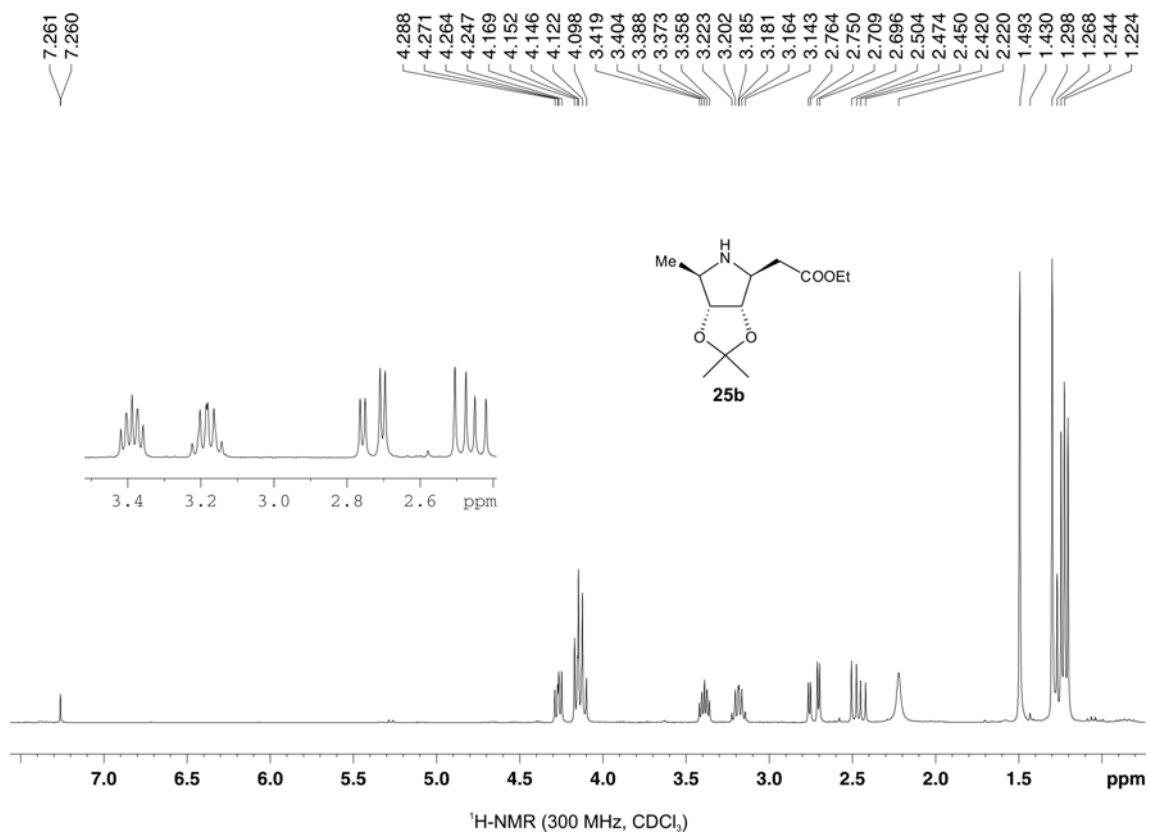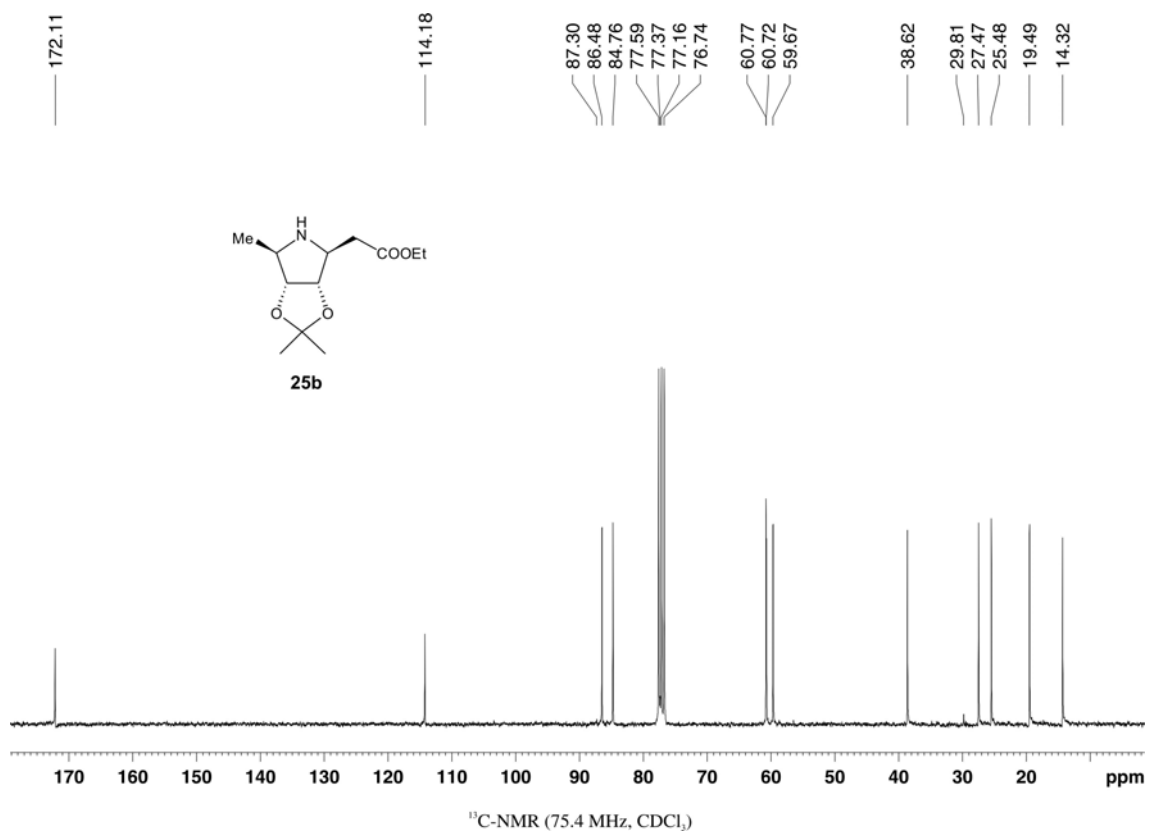

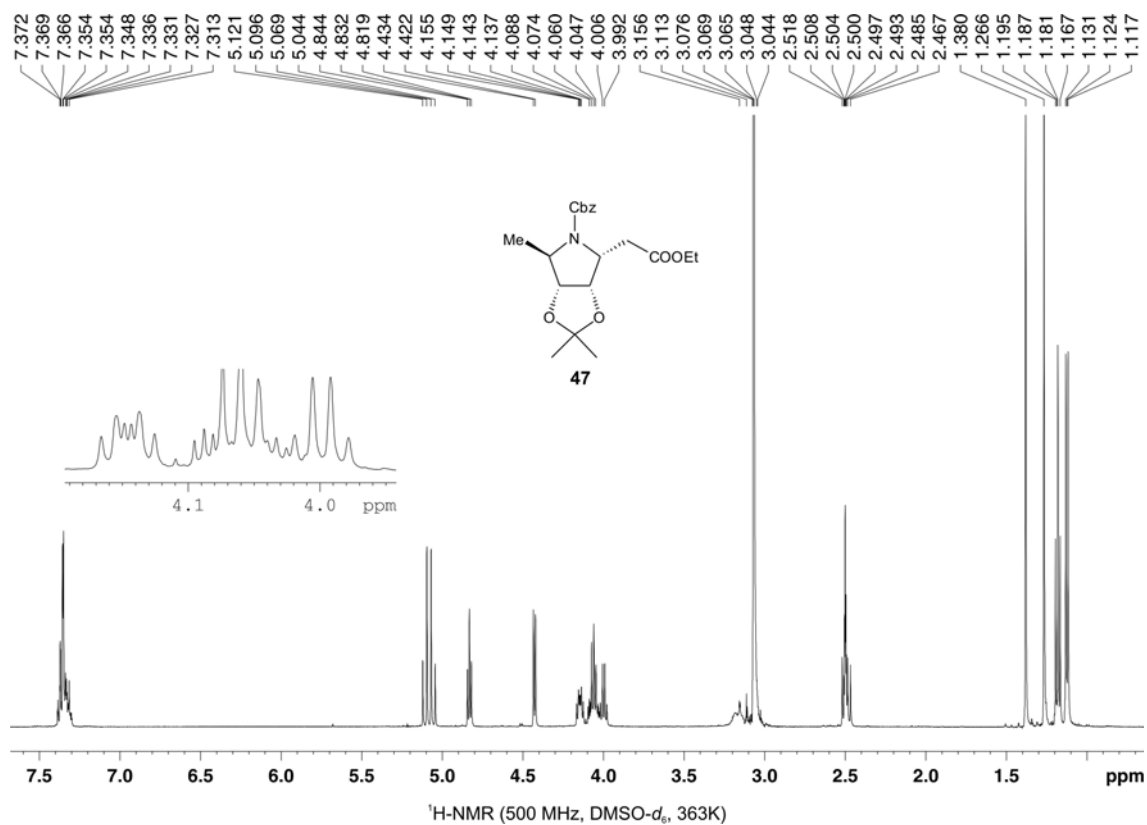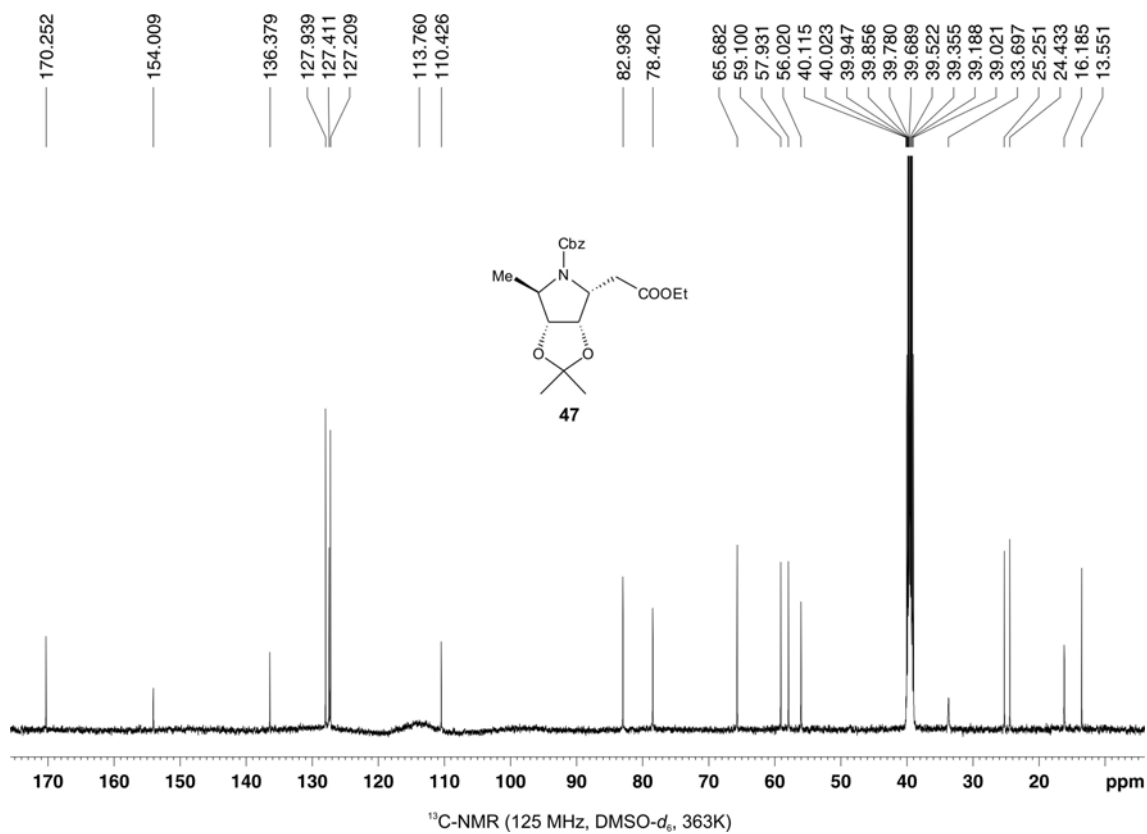

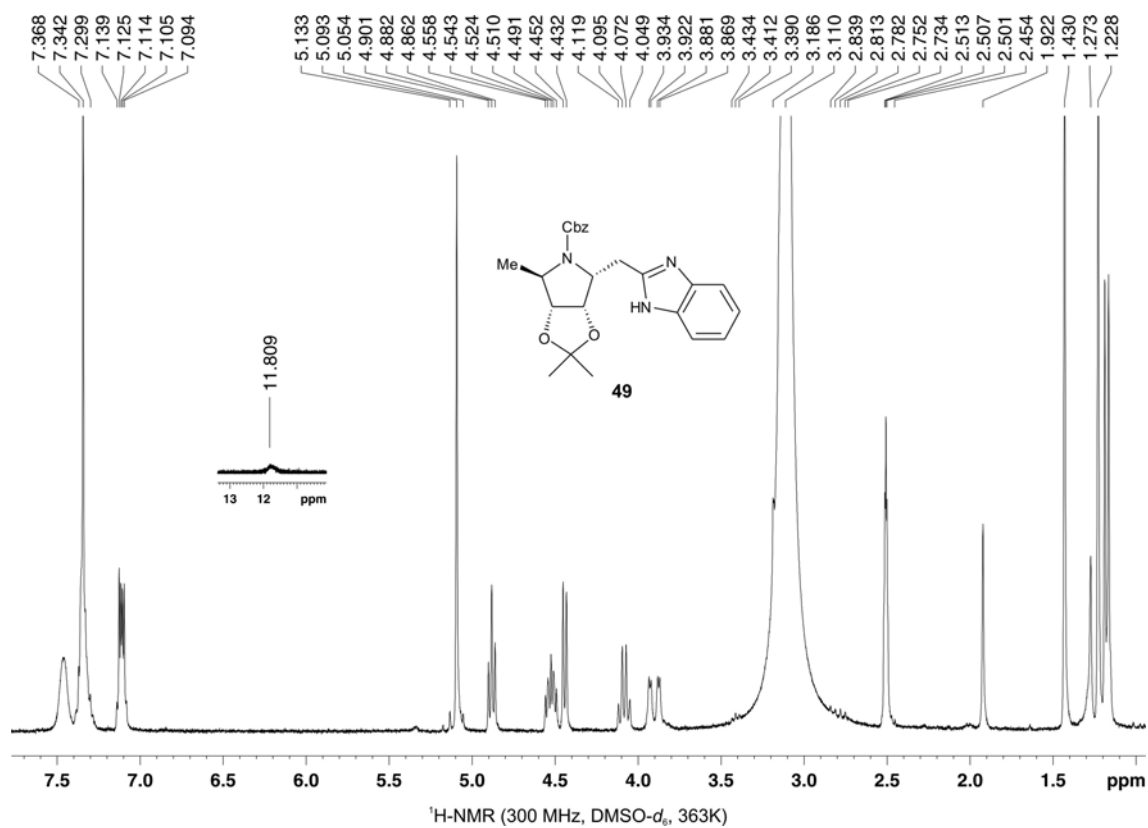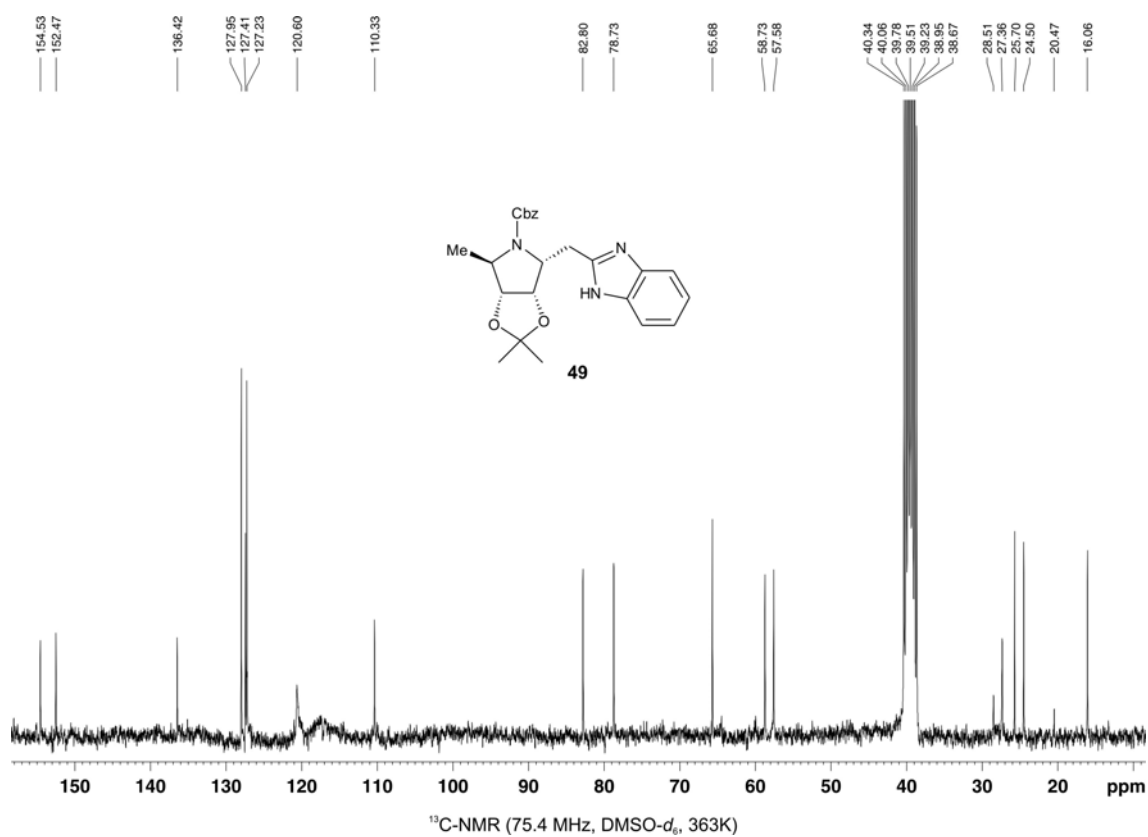

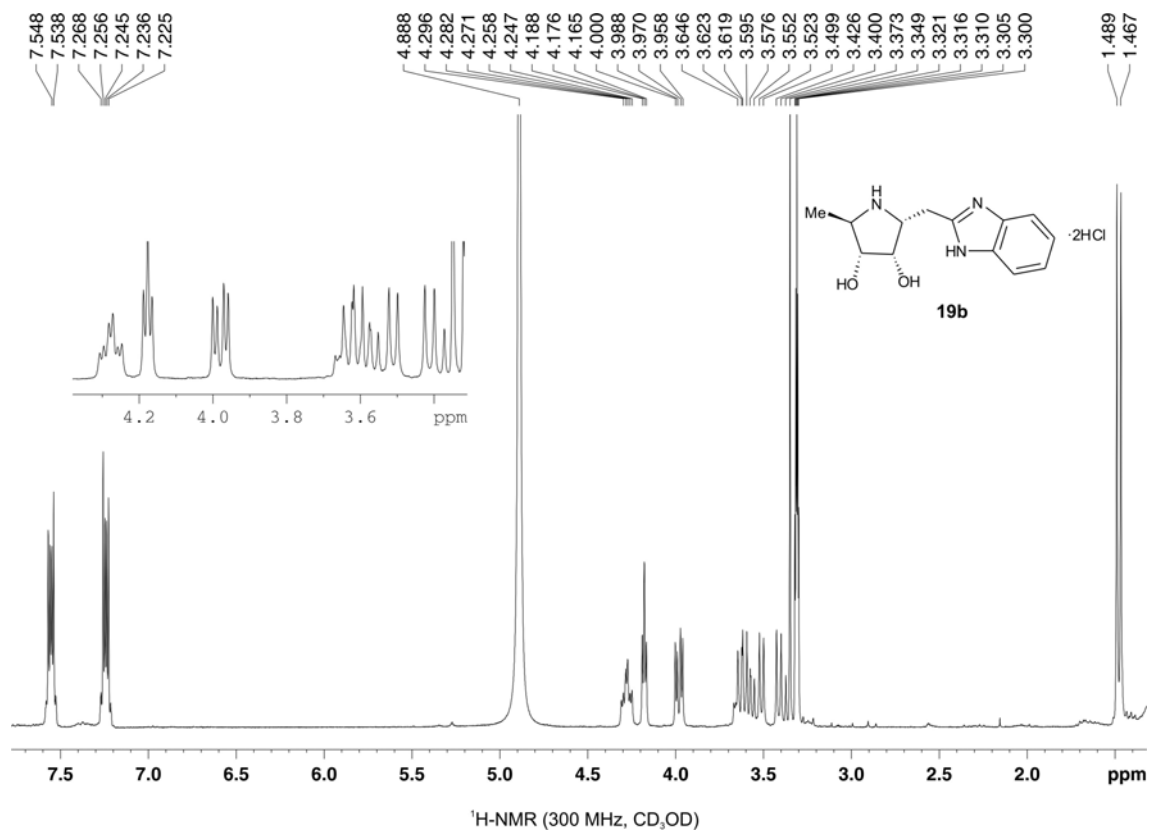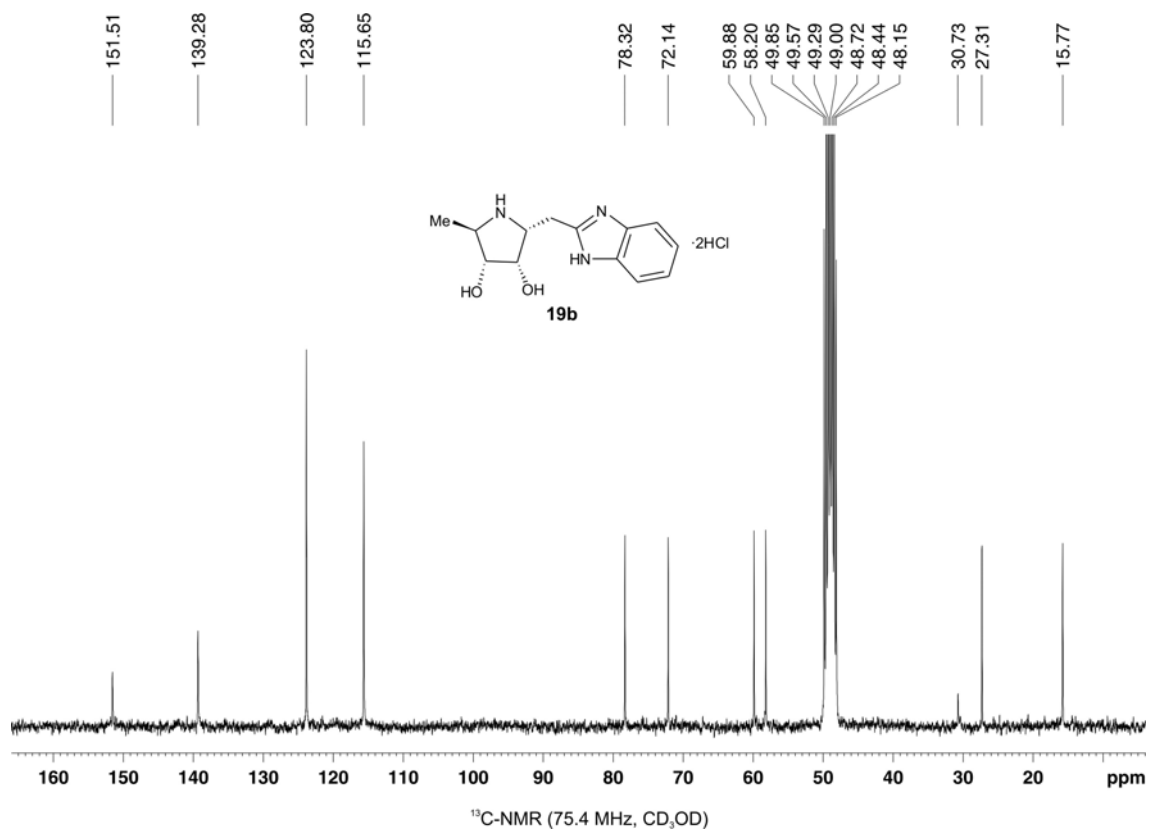

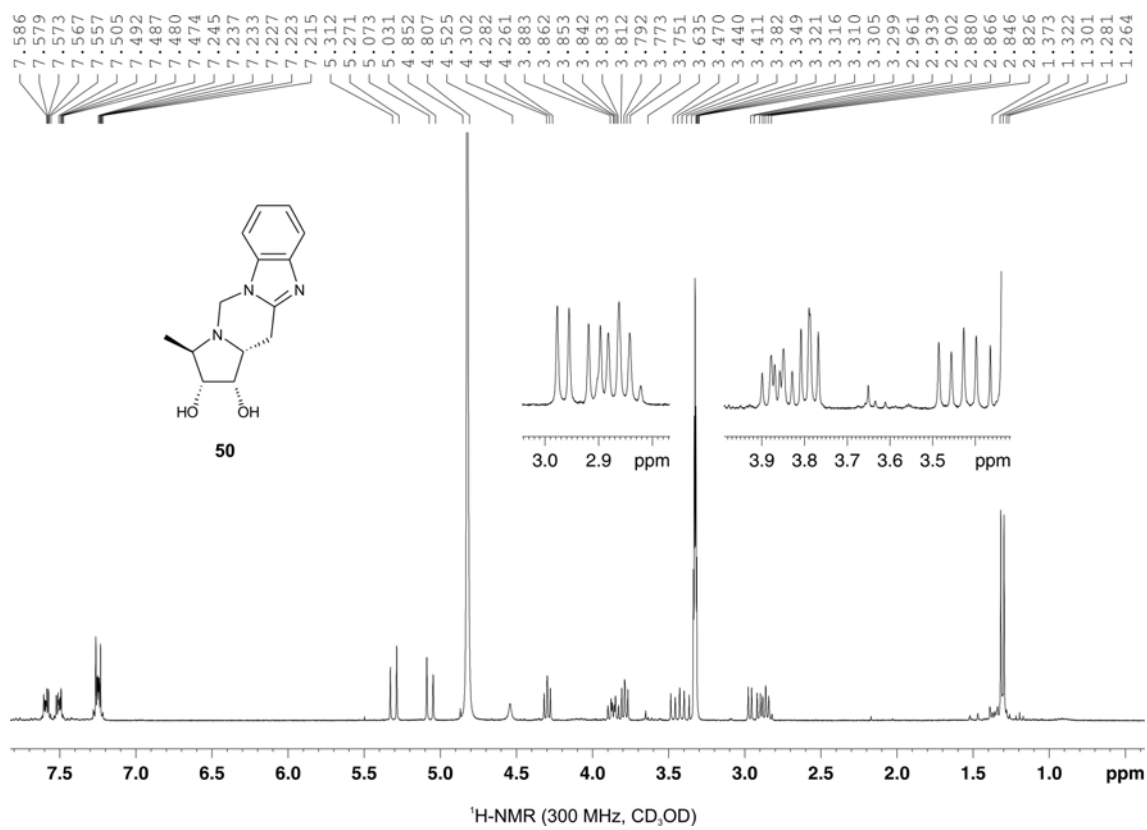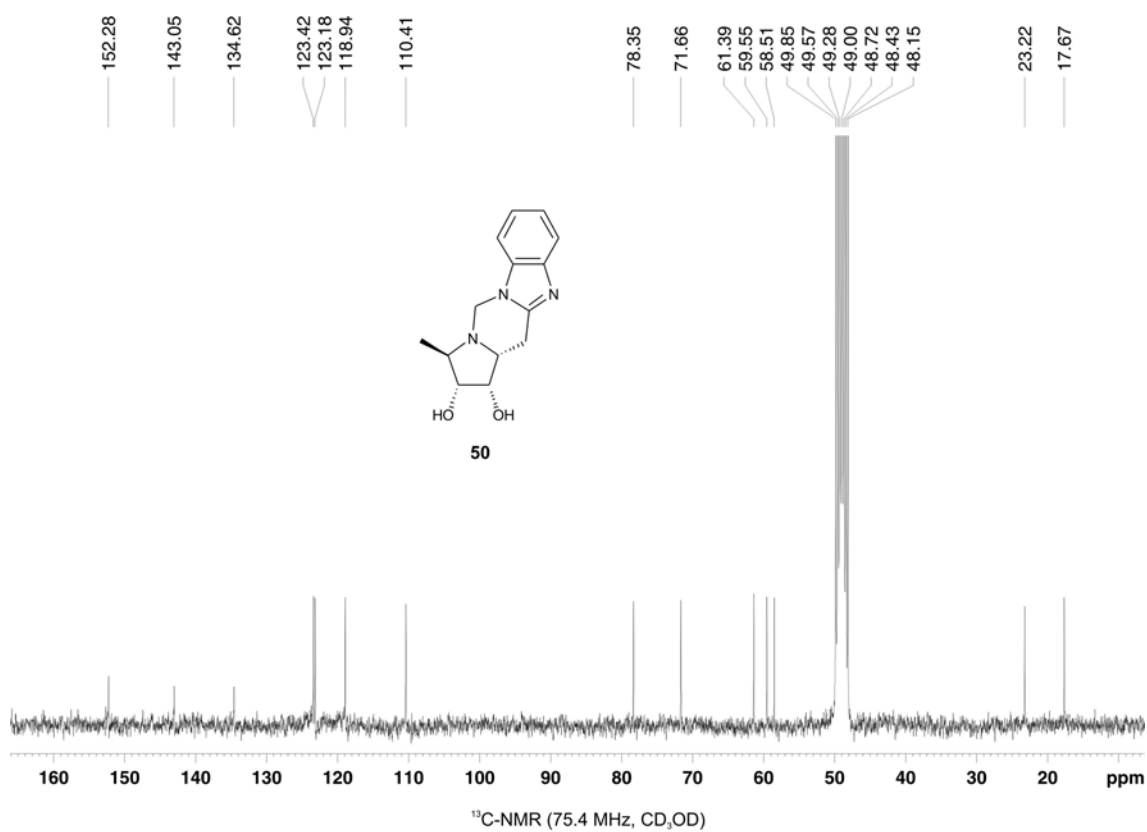



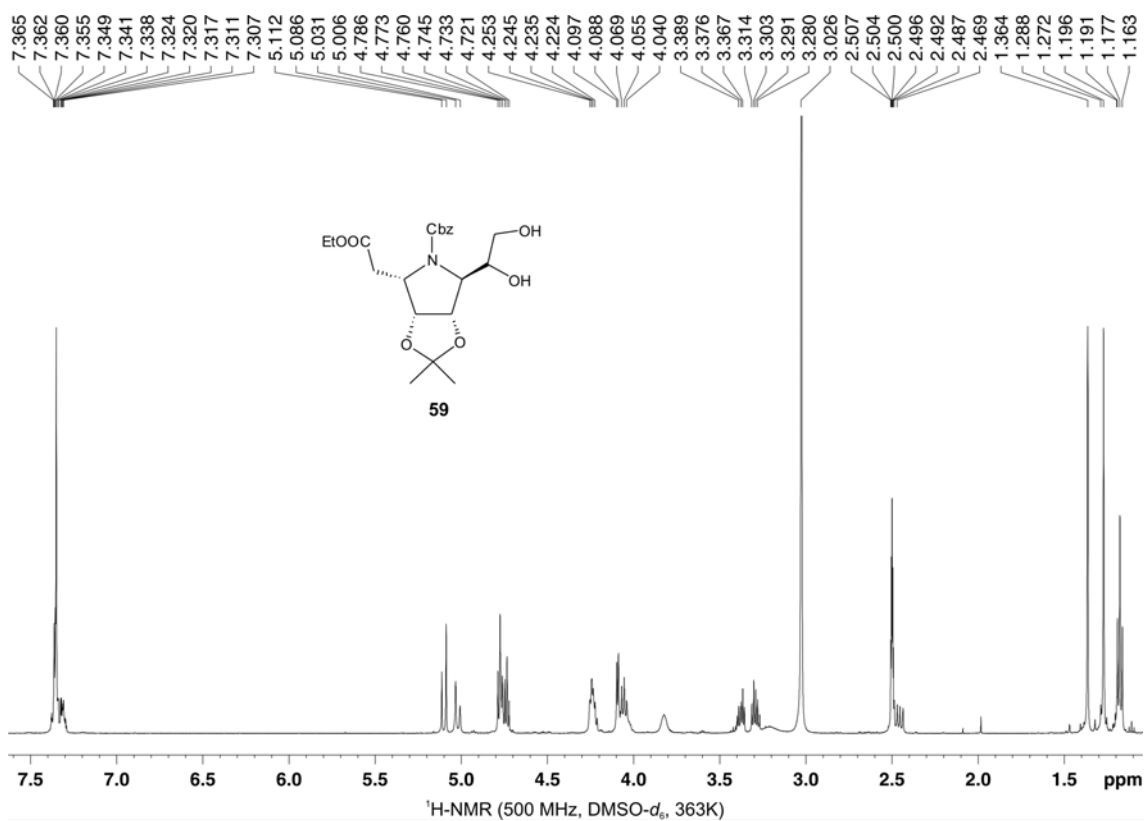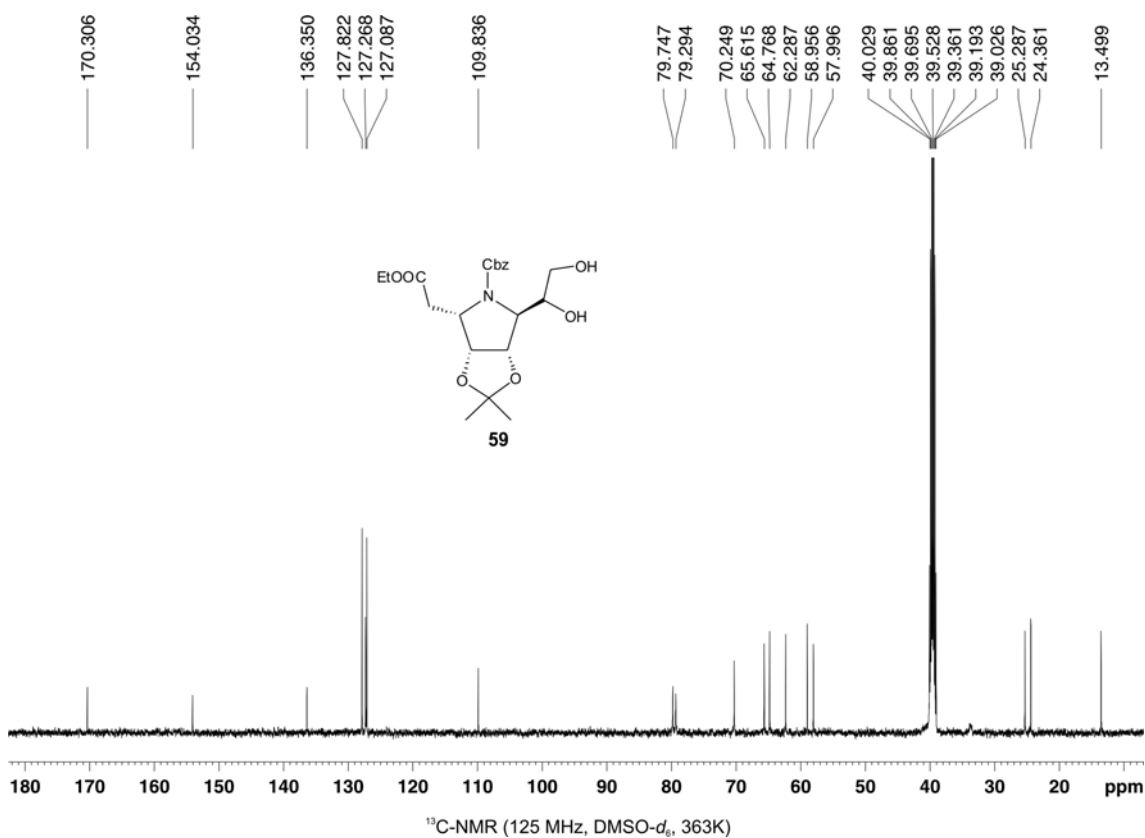

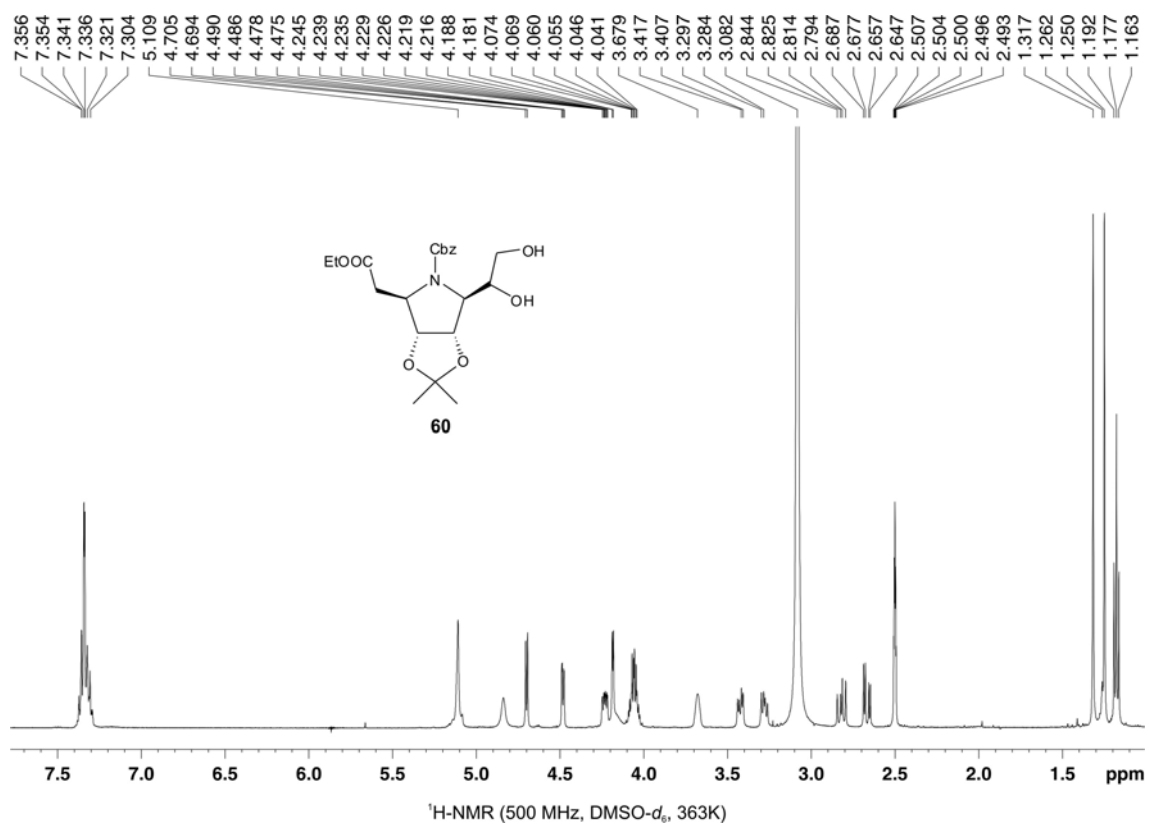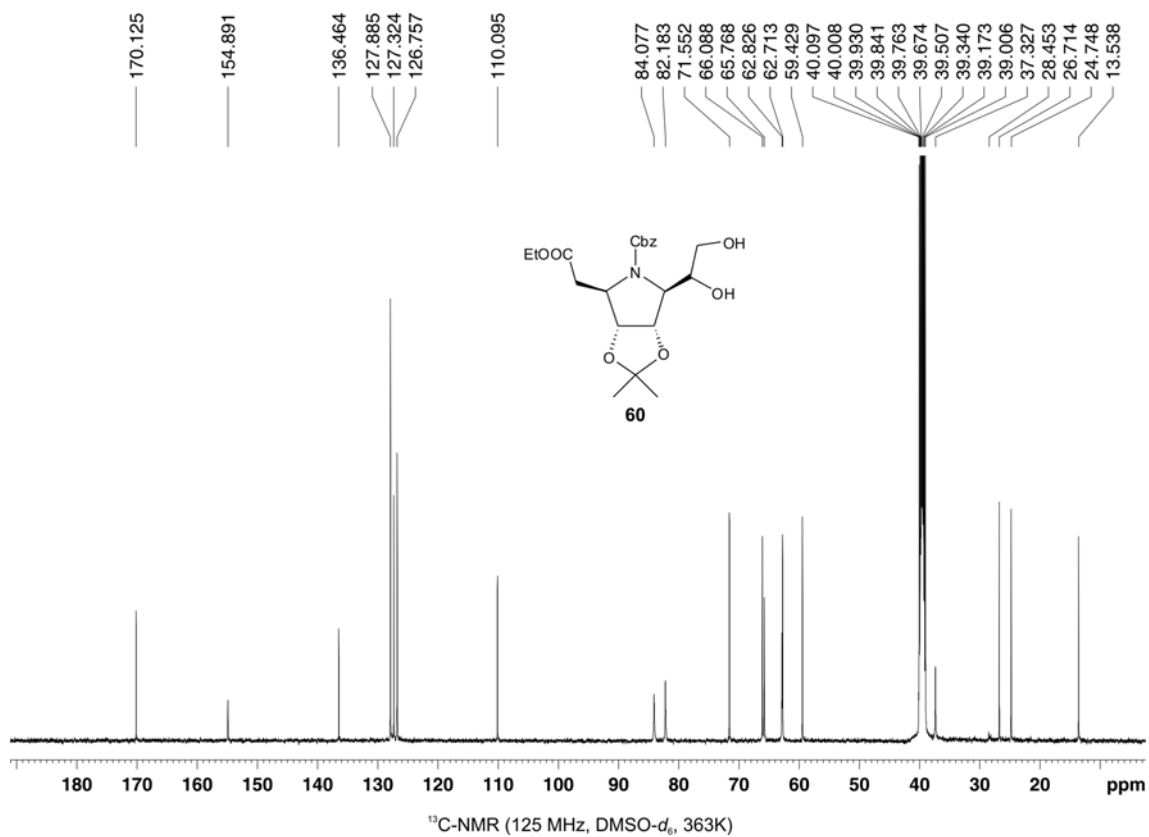

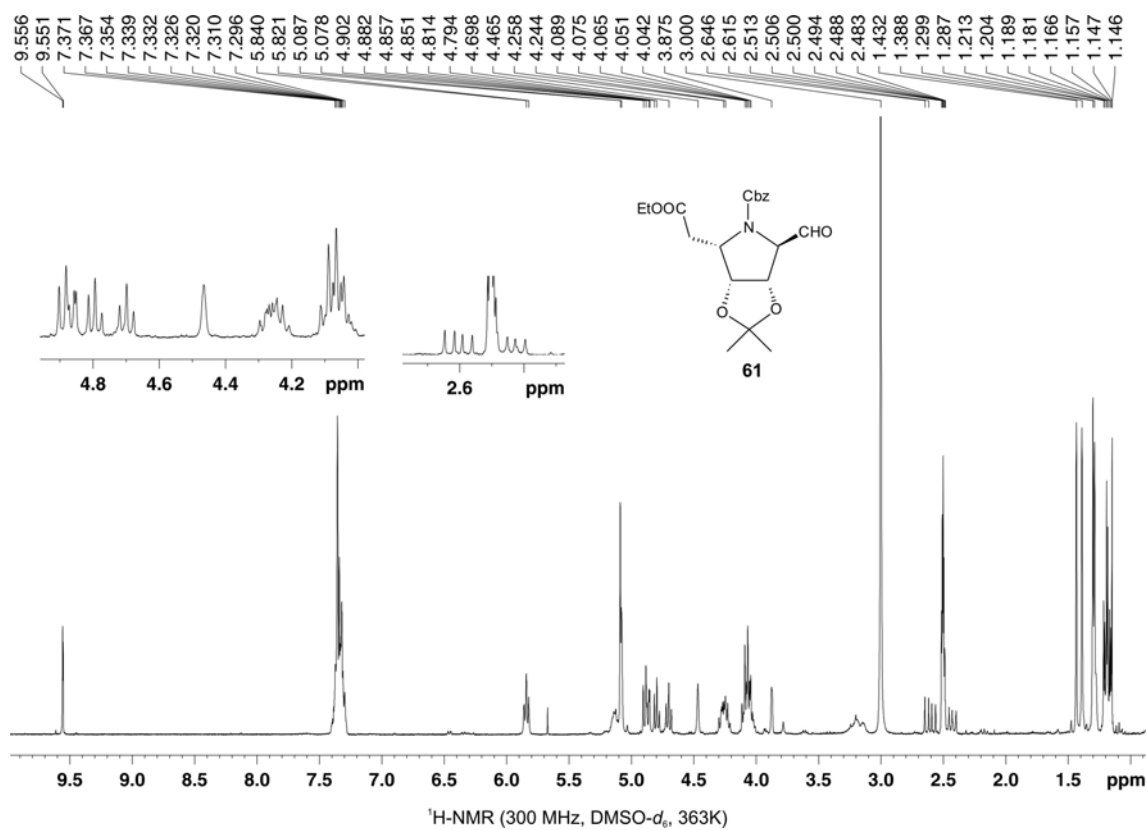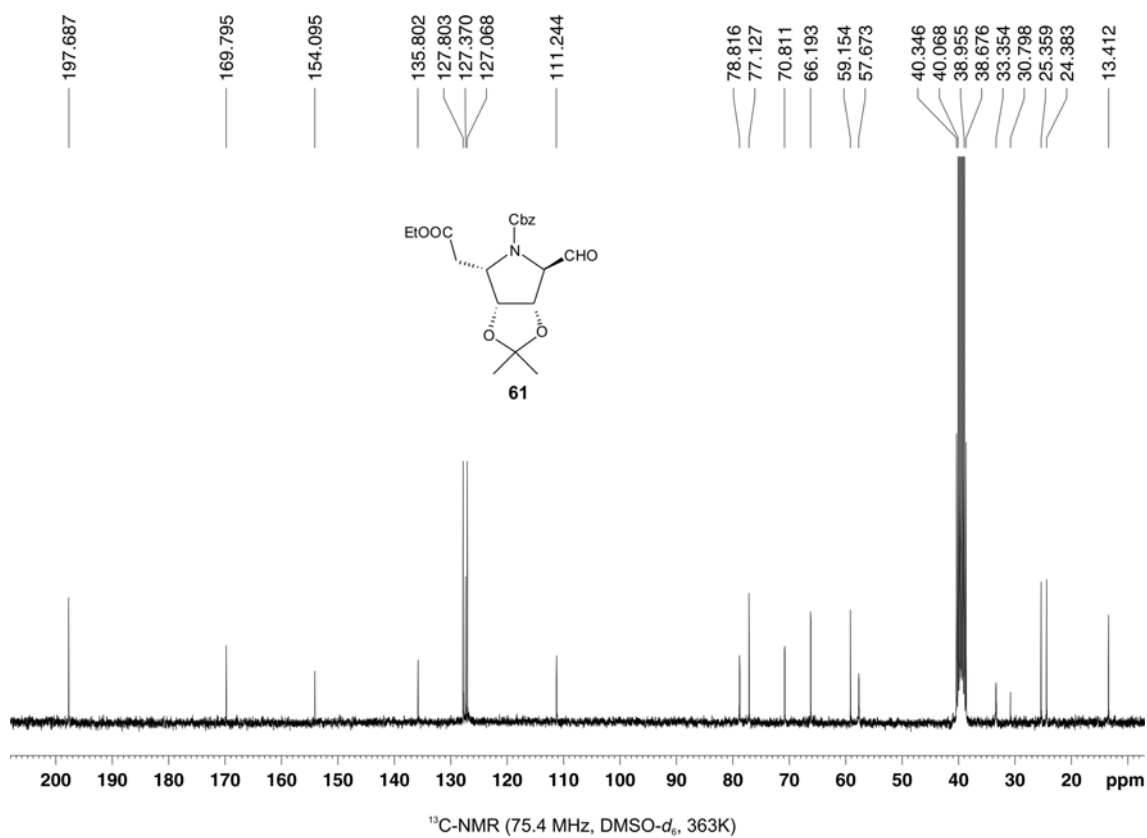

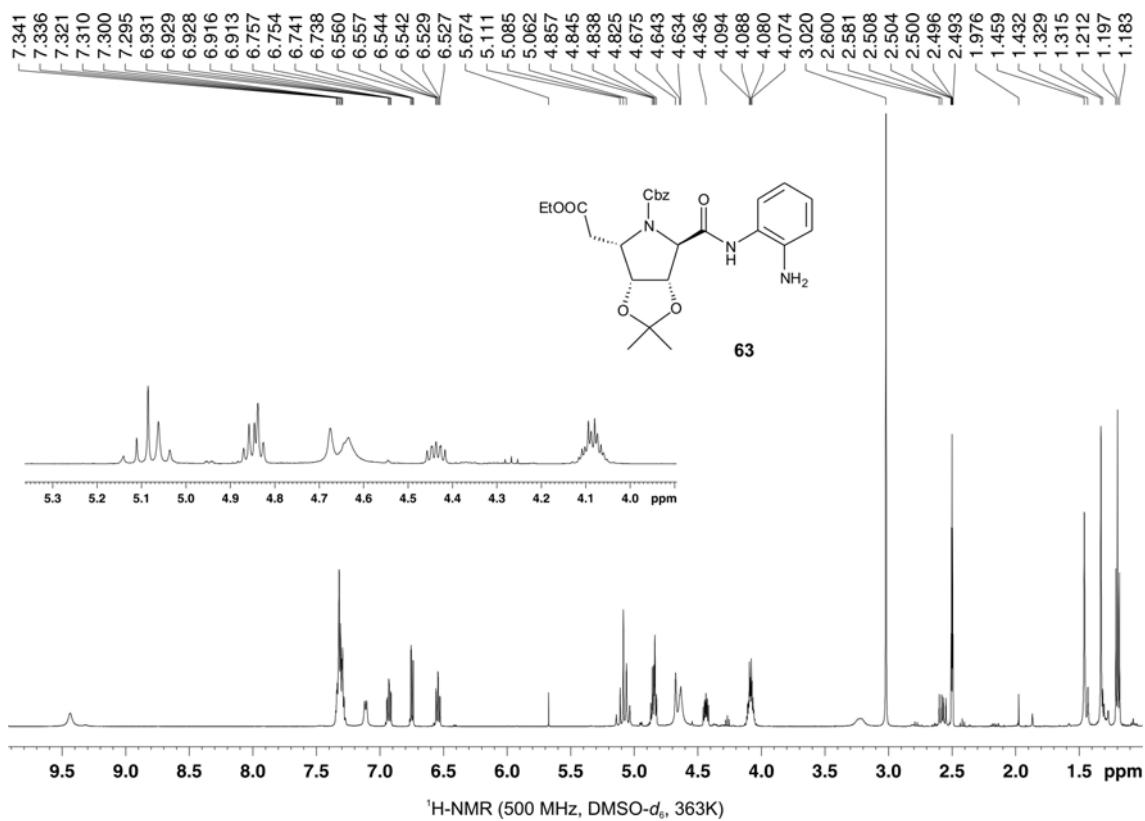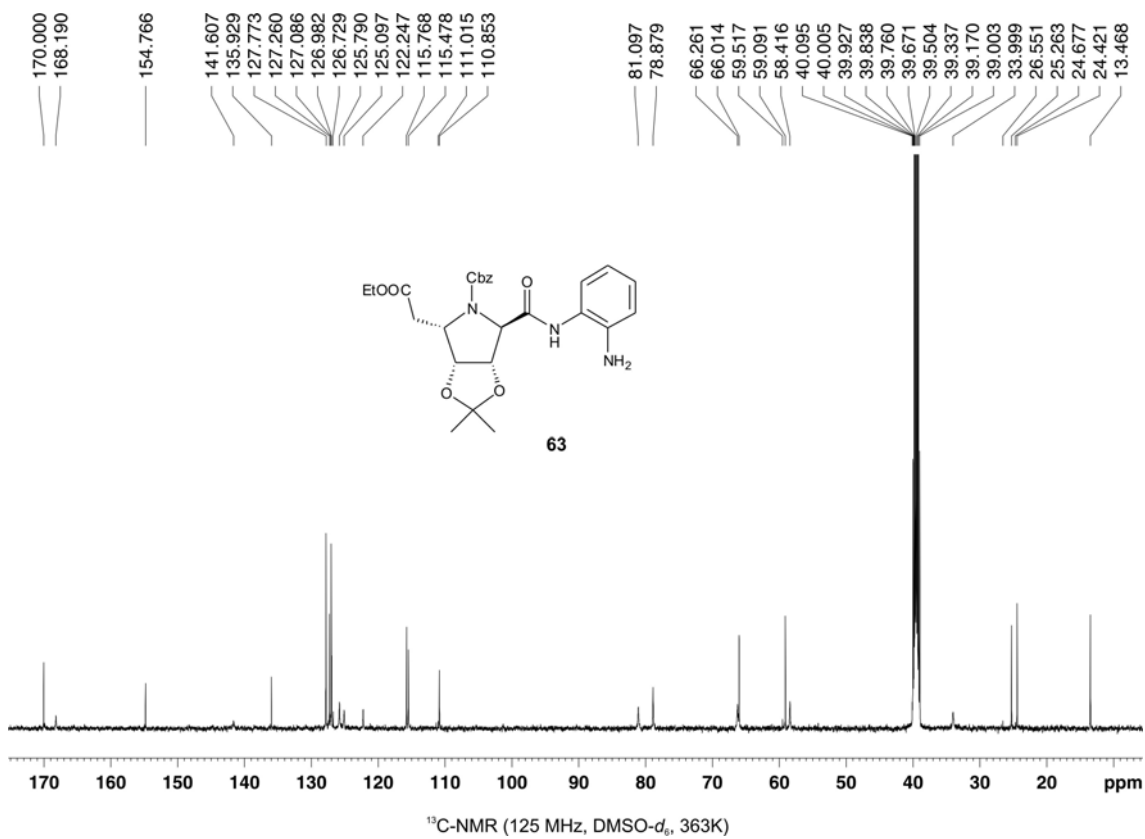

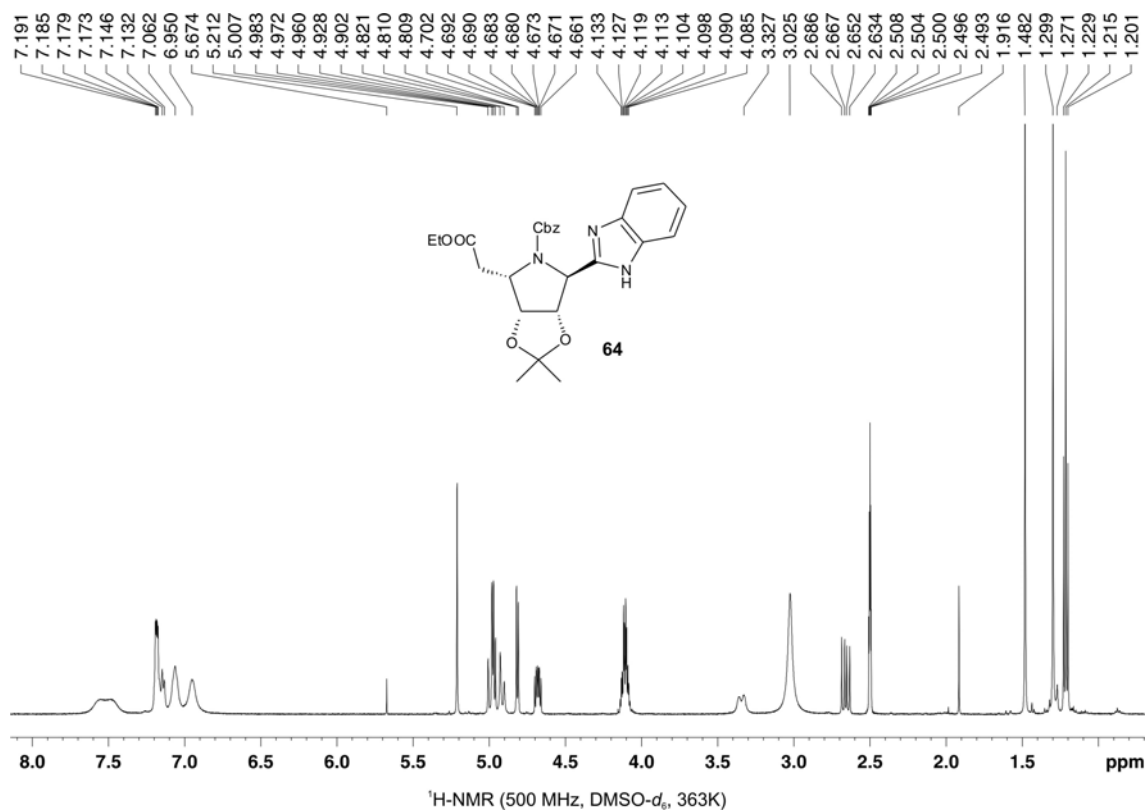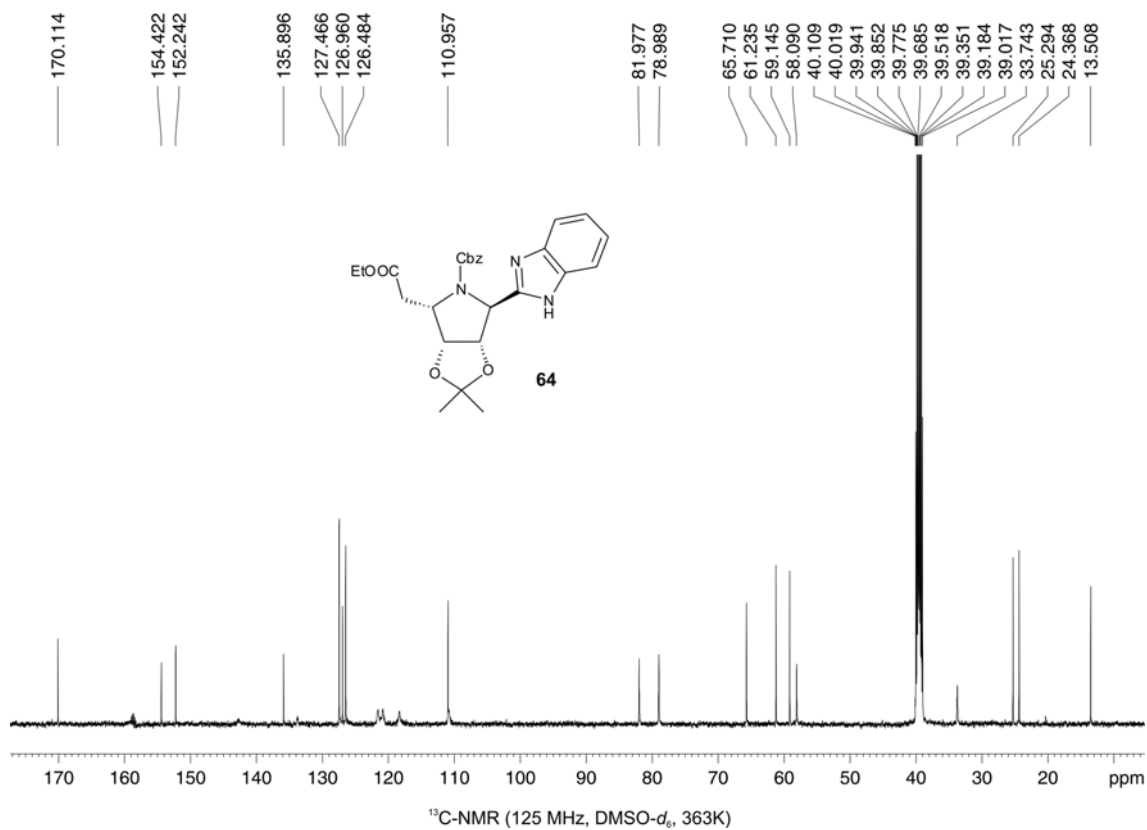

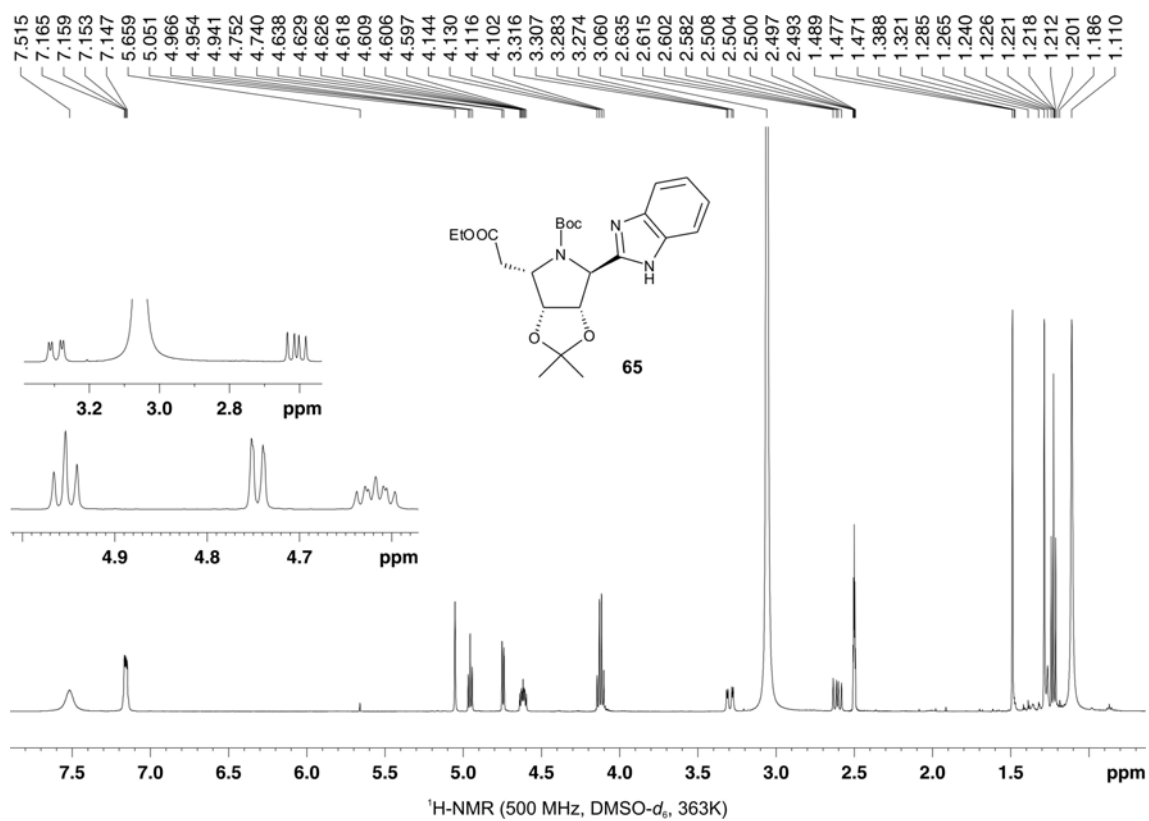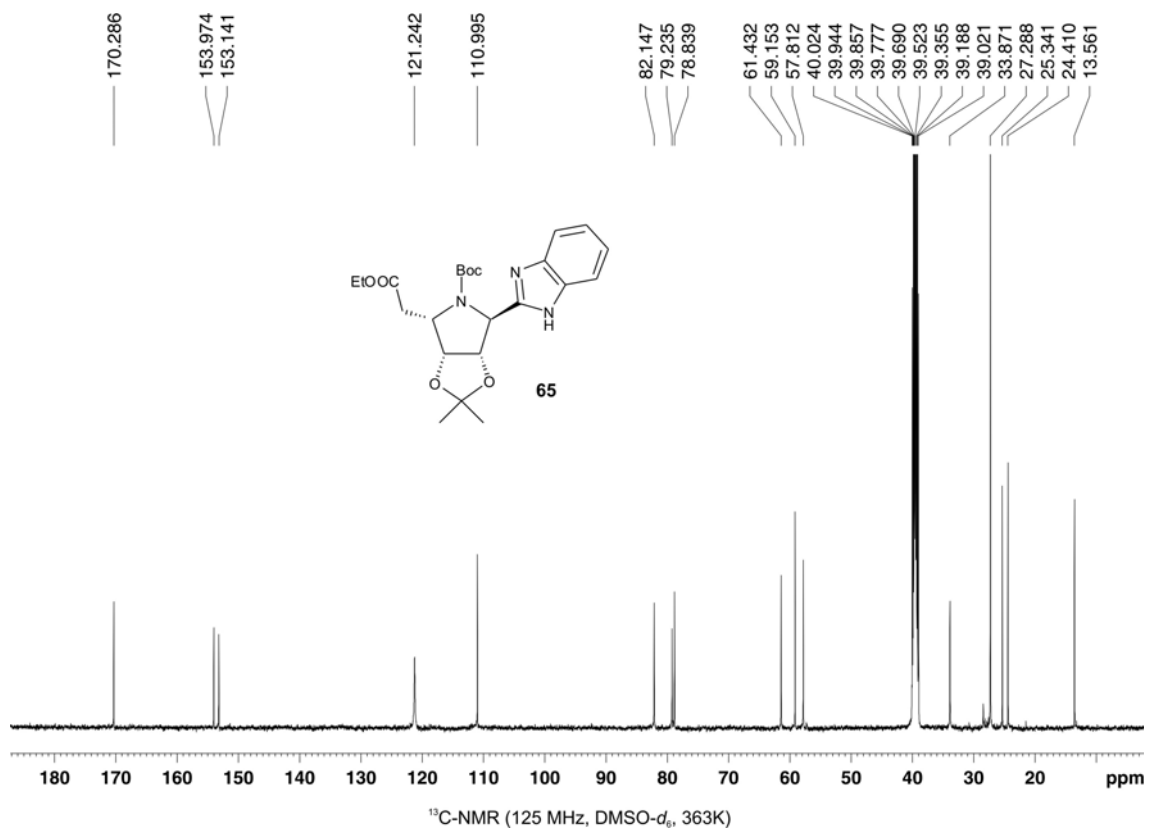

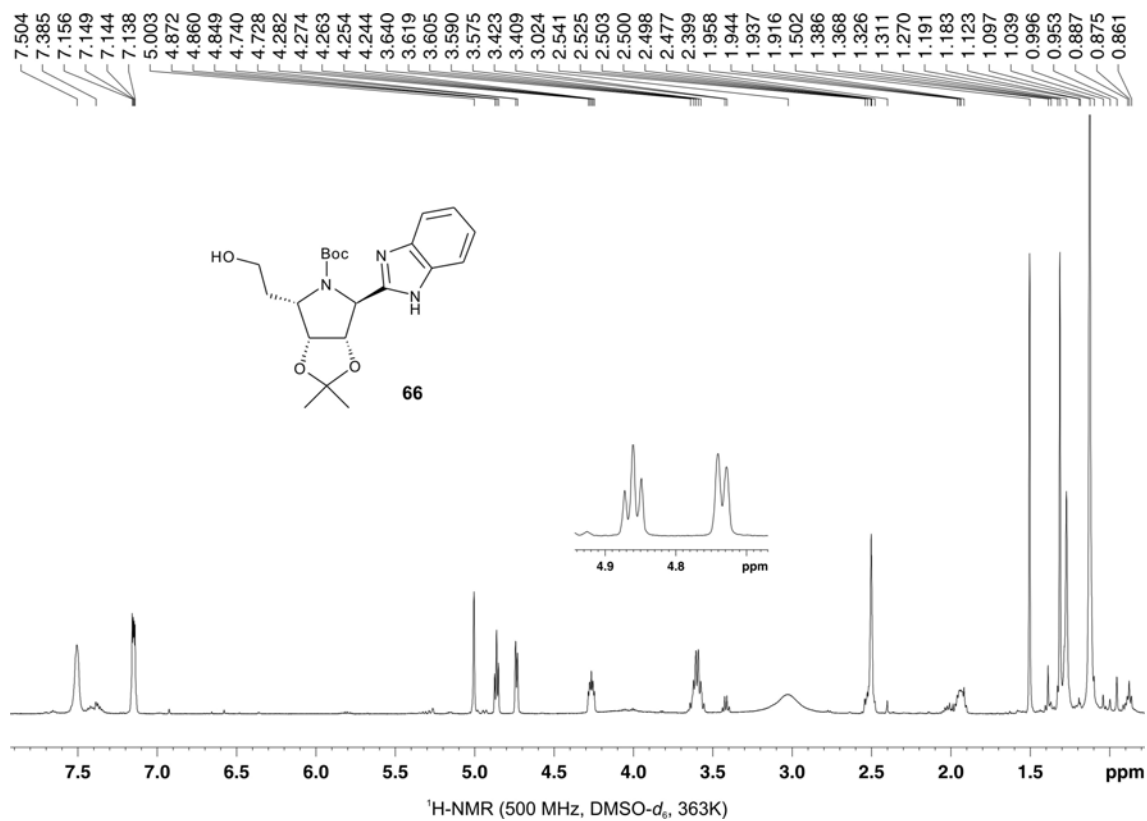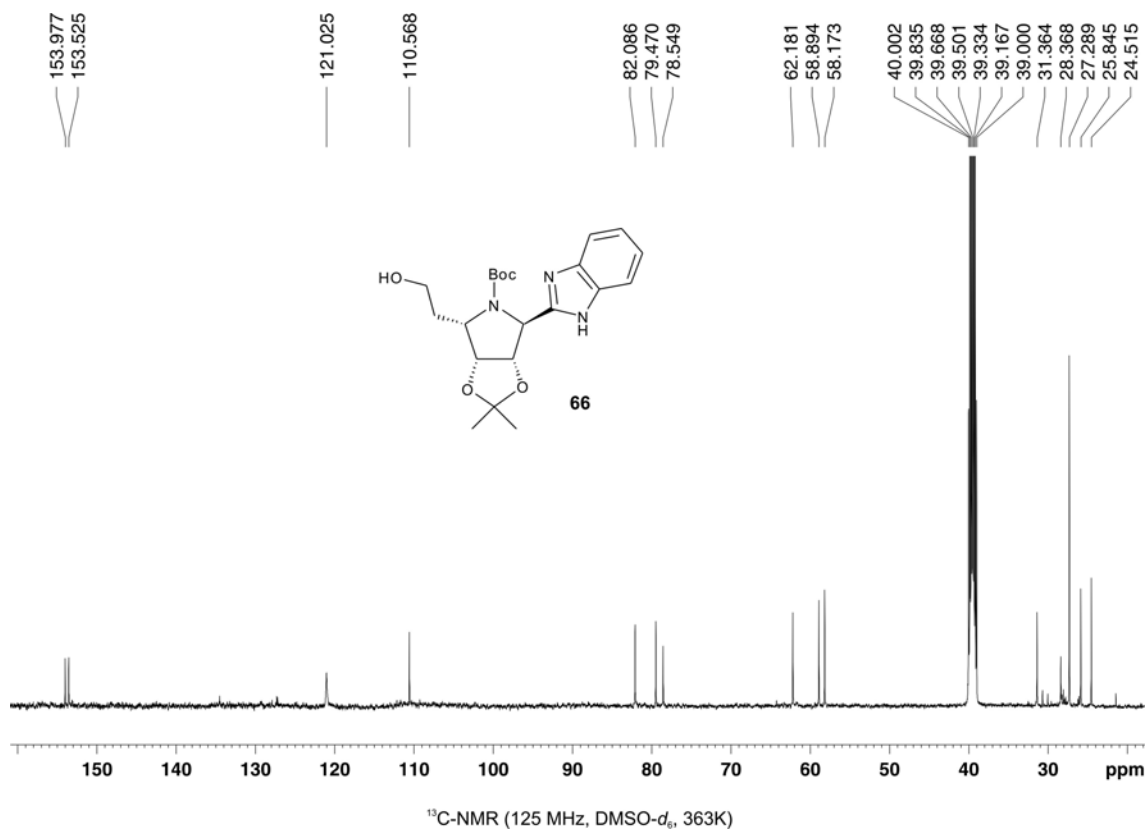

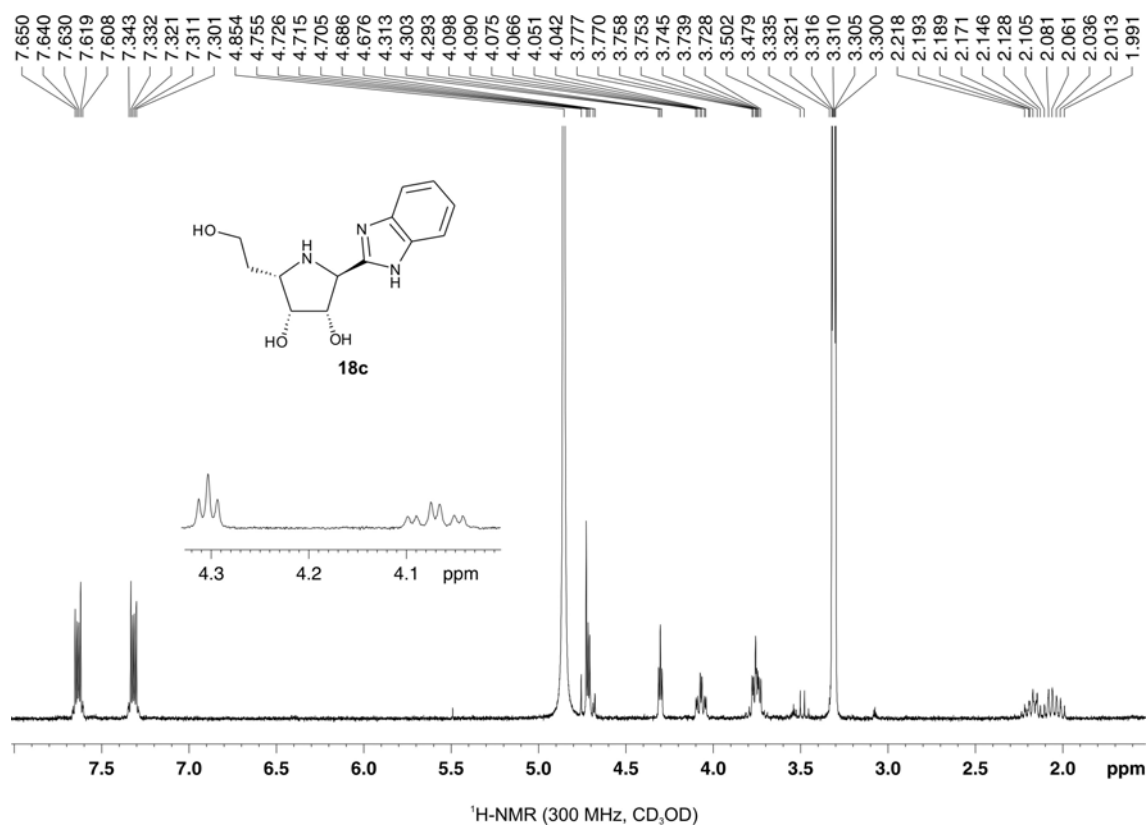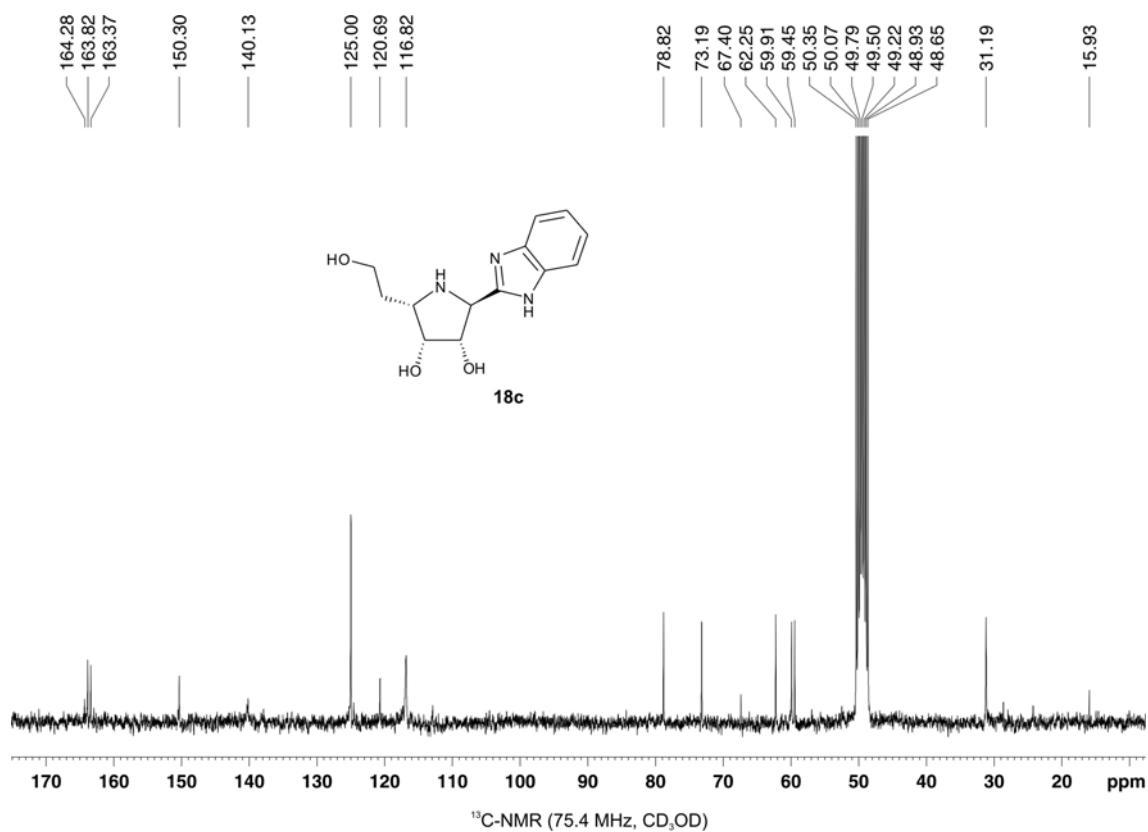



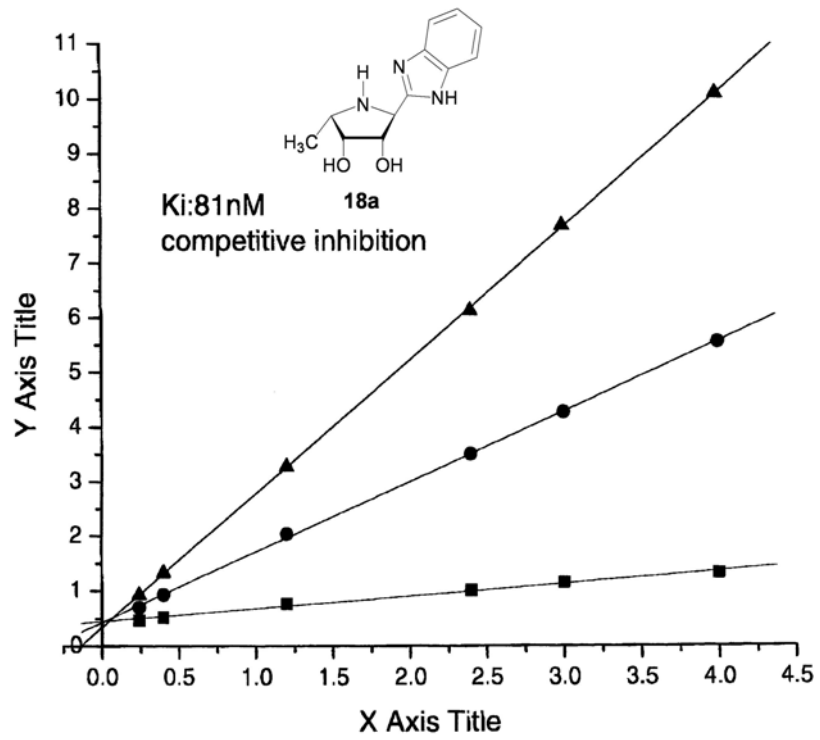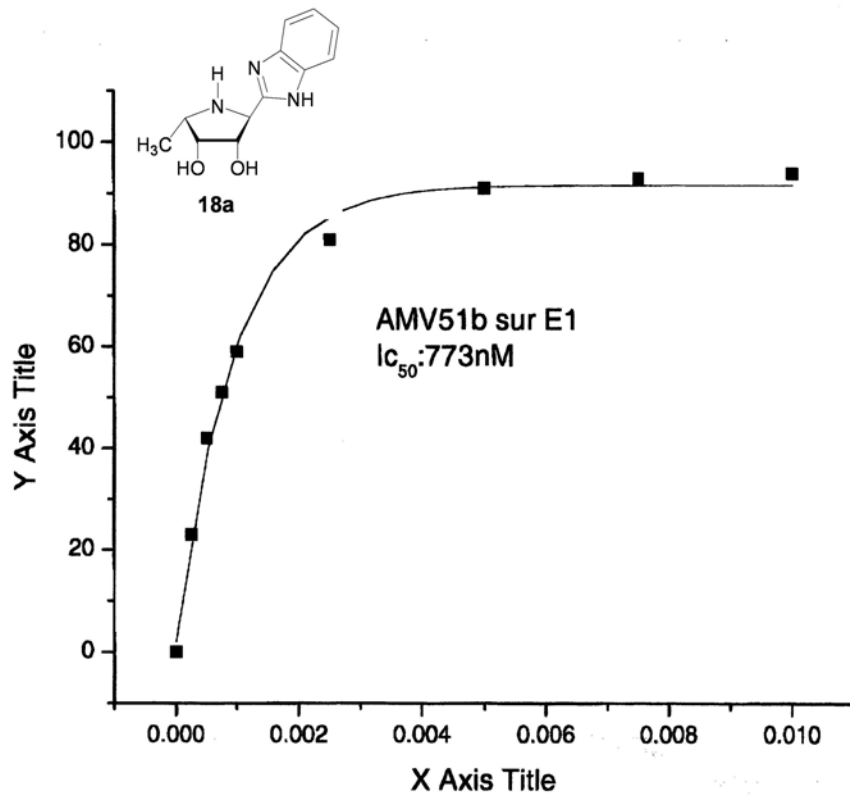

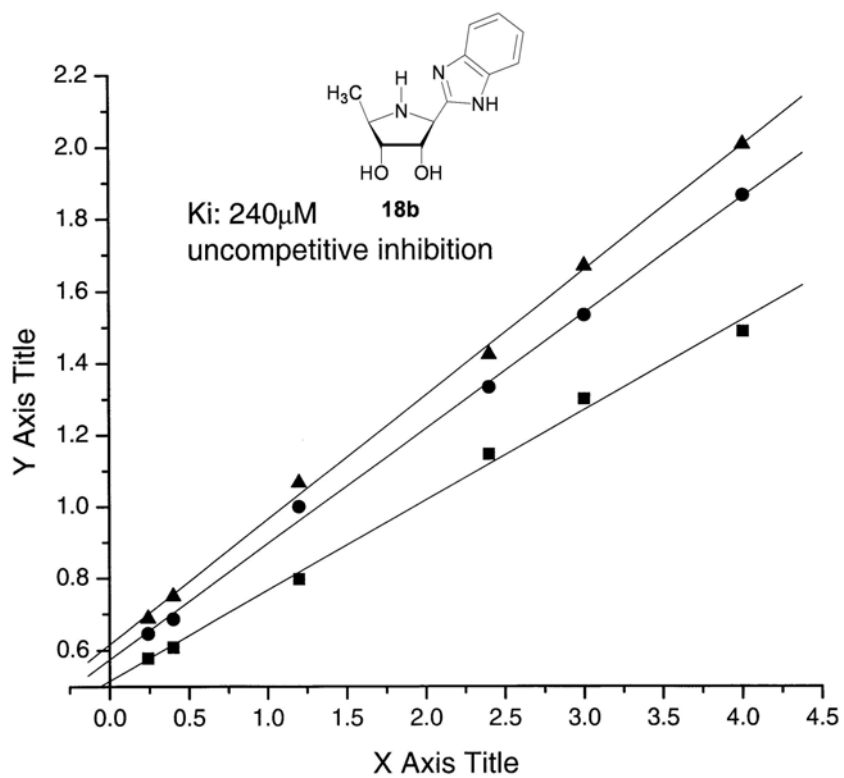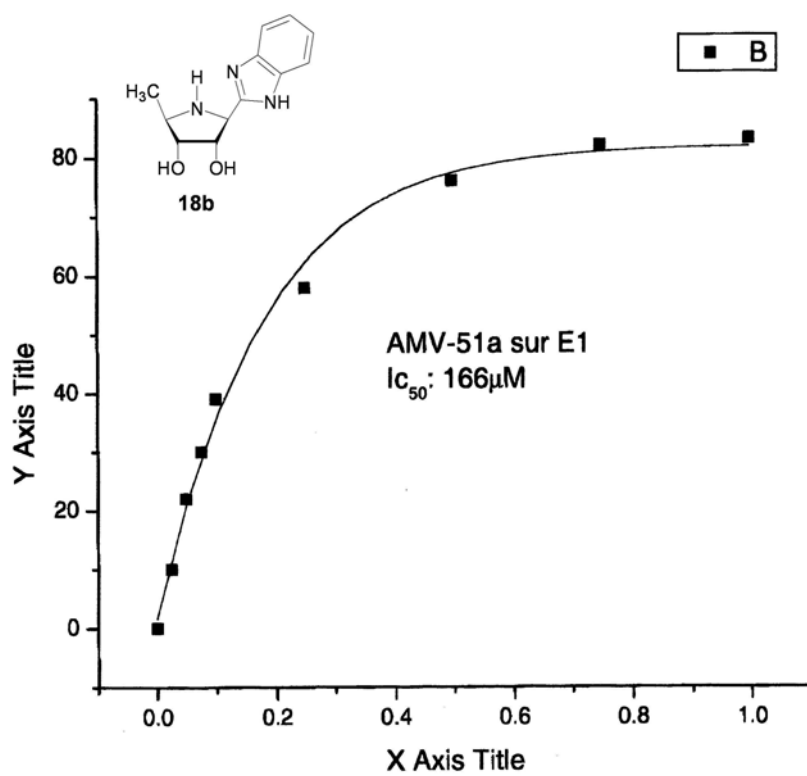

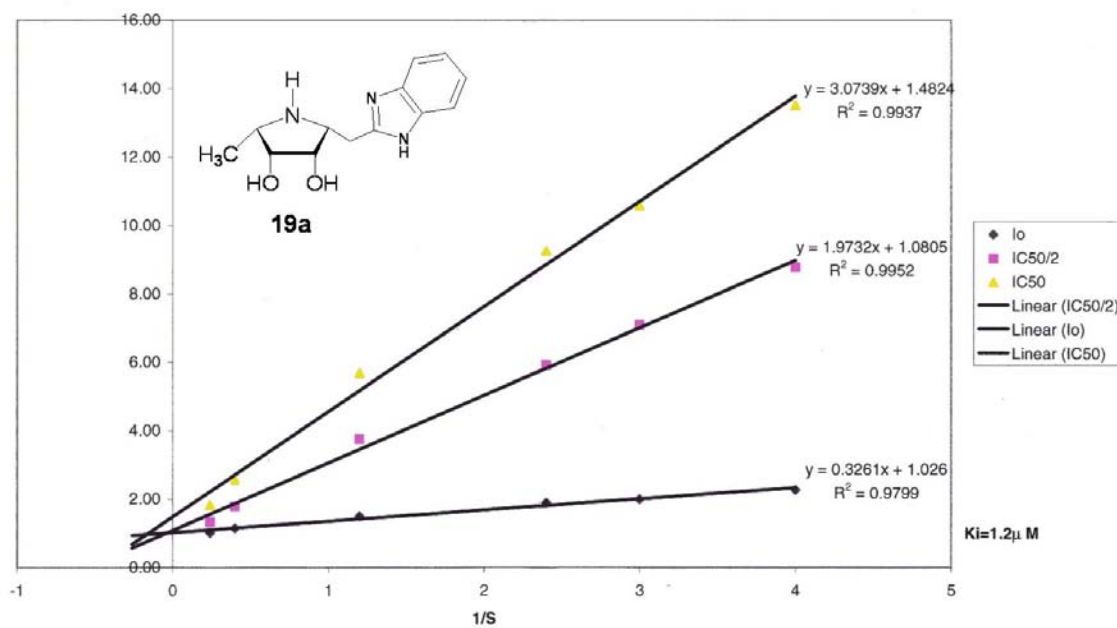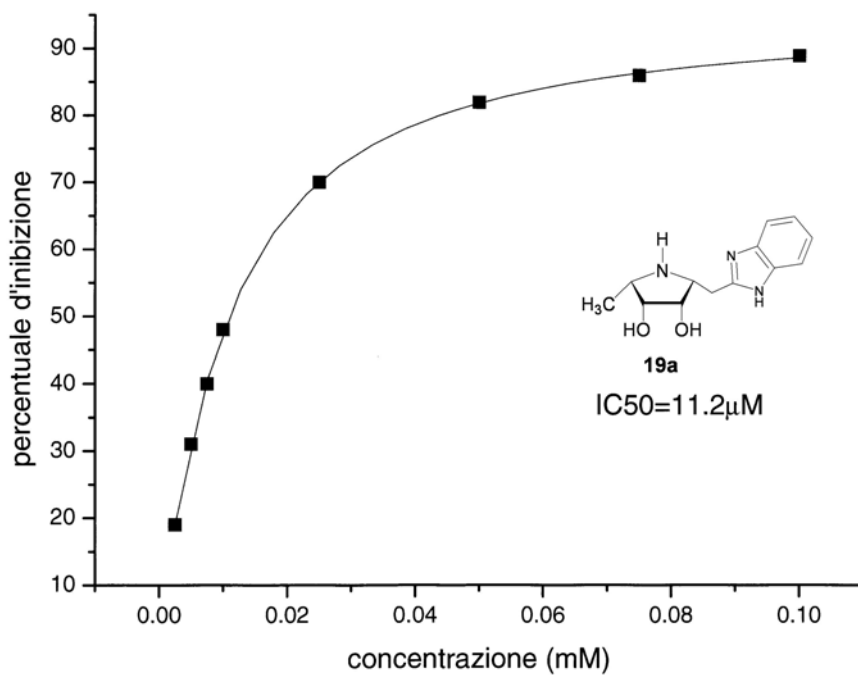

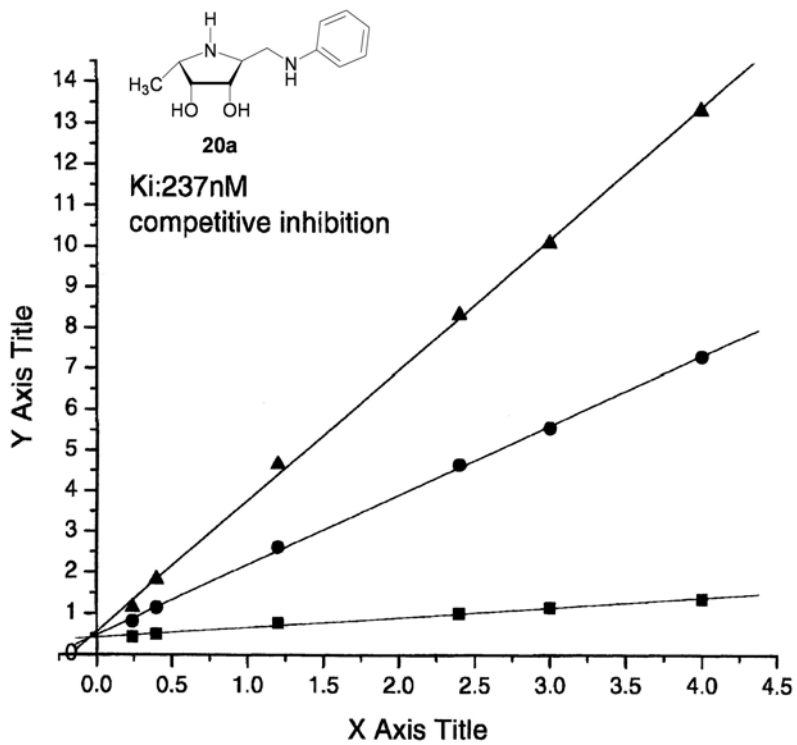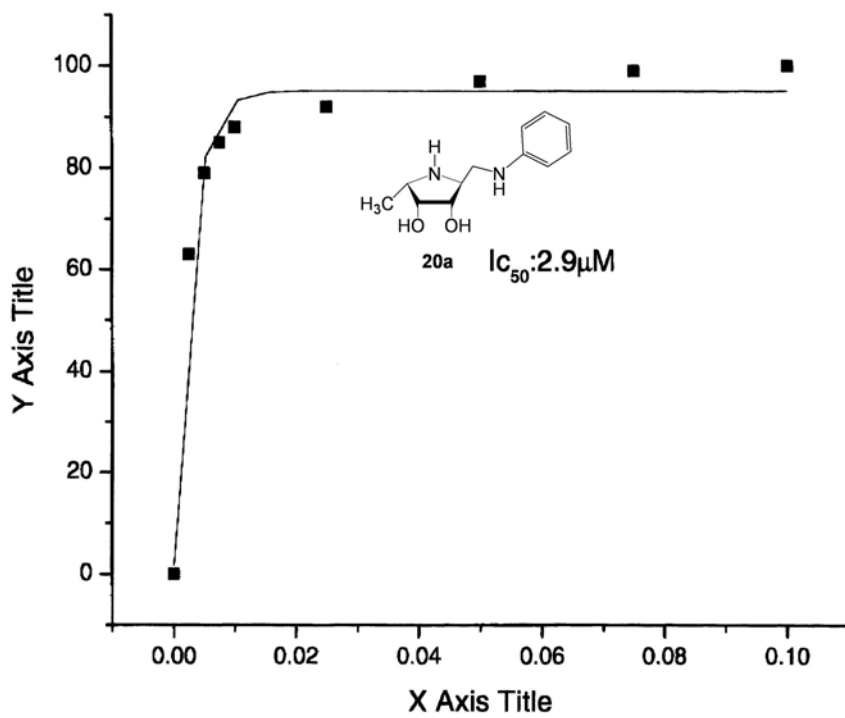

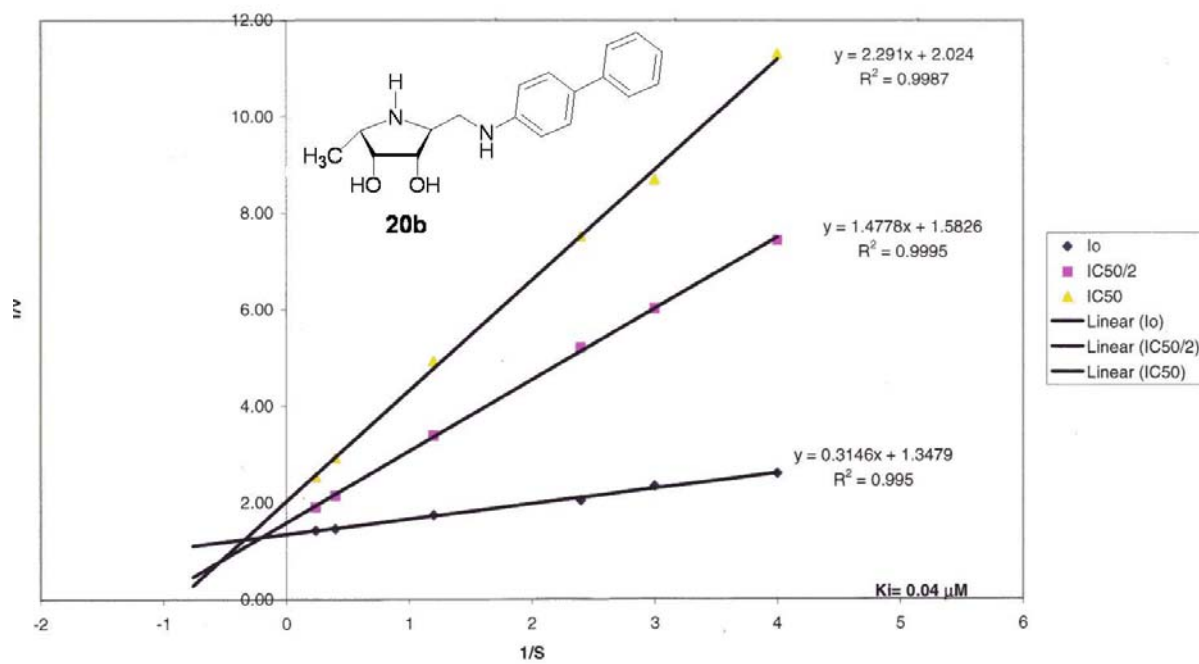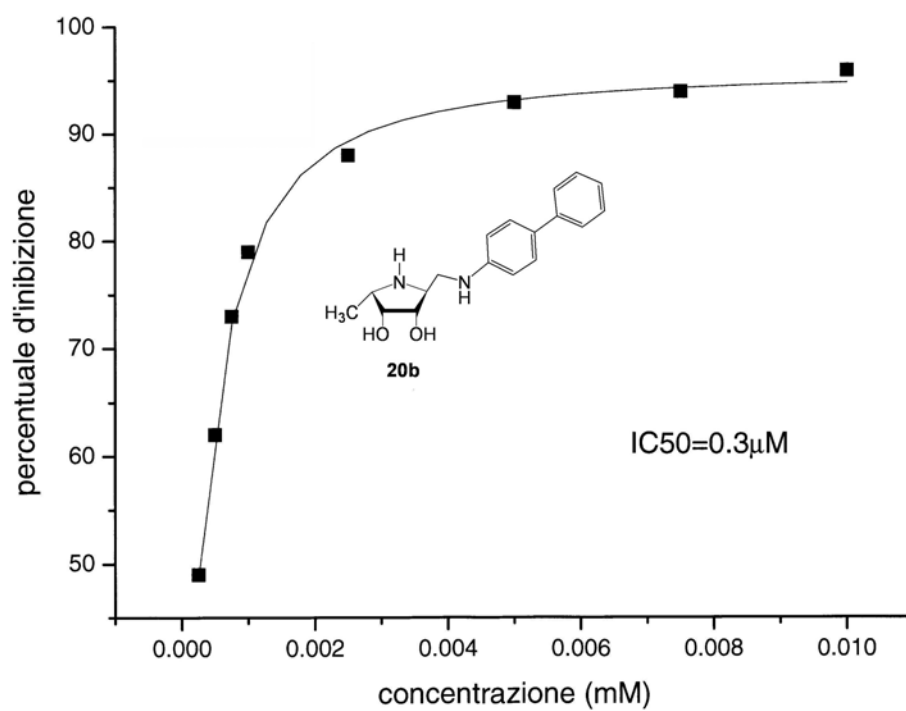

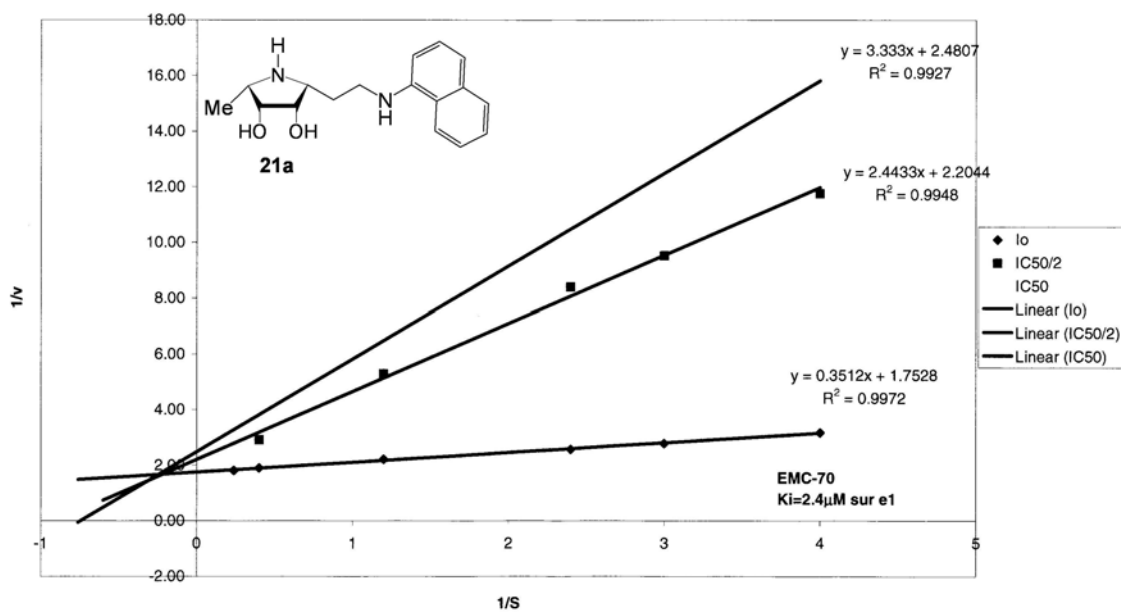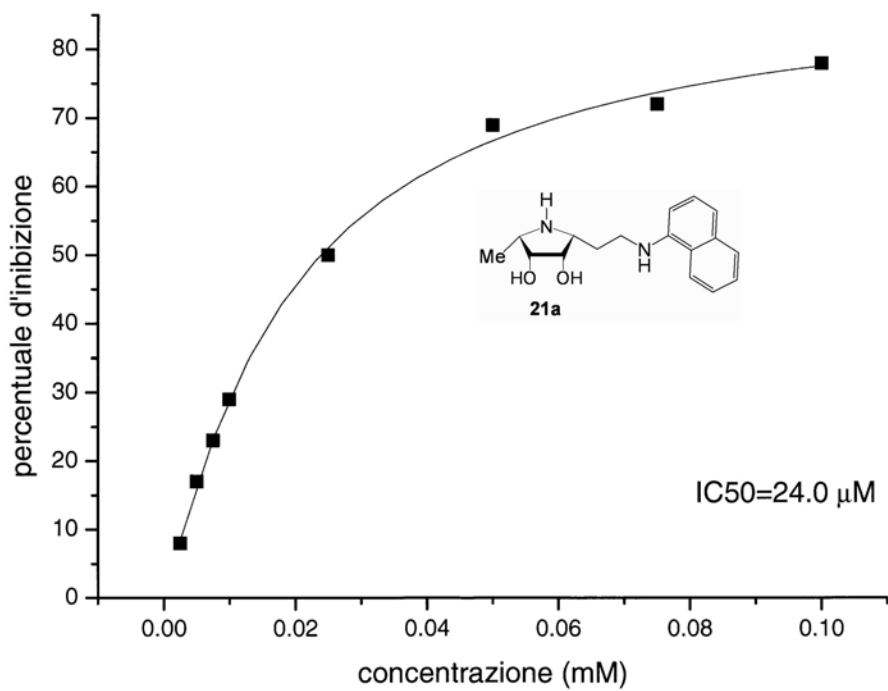

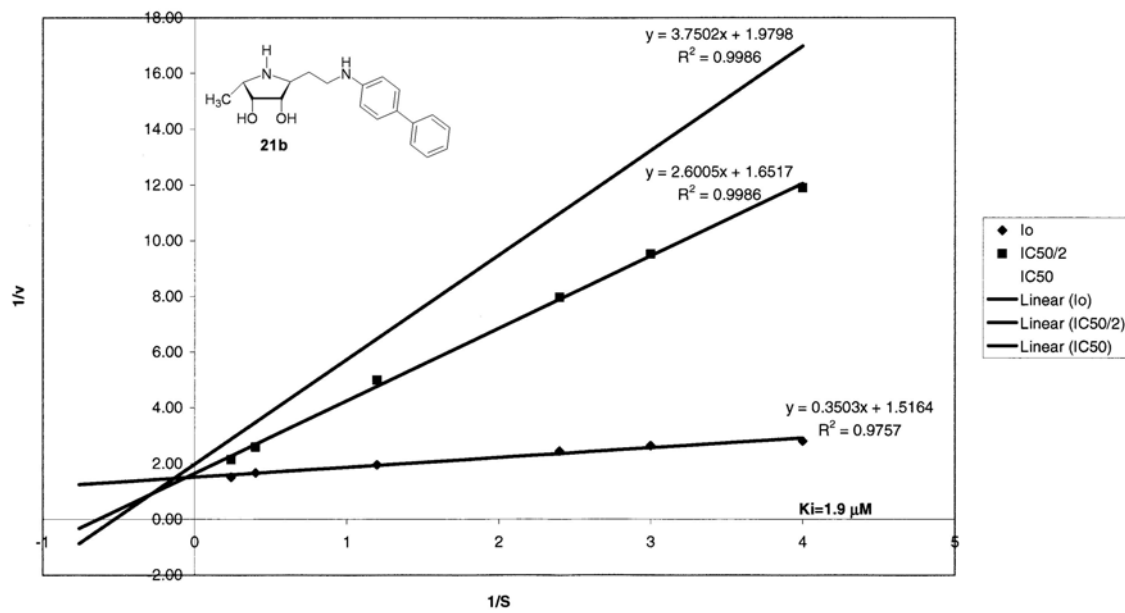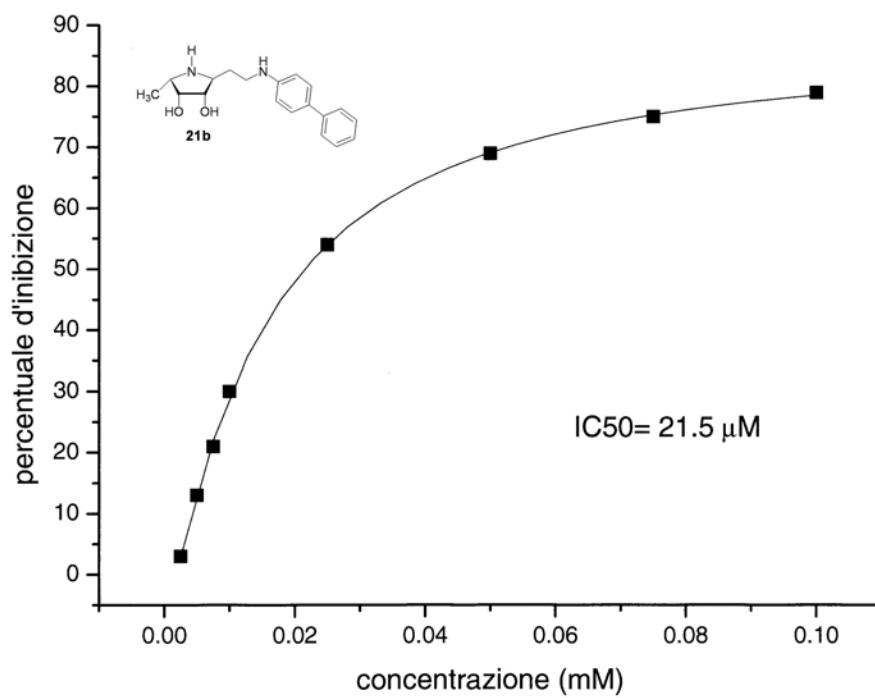

Supplement: b819867e.pdf [file b819867e.pdf]
